# Supplementary material for: Effect of bovine respiratory disease on the respiratory microbiome: a meta-analysis
Source: Front Cell Infect Microbiol. 2023 Sep 8;13:1223090. doi: 10.3389/fcimb.2023.1223090 (PMC10516580; doi:10.3389/fcimb.2023.1223090)
Supplement: Supplementary file 4 [file Table_1.xlsx]

## Sheet: Suppl. Table 1
Supplementary Table 1. Alpha diveristy analysis full database
author	pub_year	count	paper_num	sample.type	time	location	age	data acquisition	data format	healthy_sample	BRD_sample	healthy_mean_shannon	health_sd_shannon	BRD_mean_shannon	BRD_sd_shannon	healthy_mean_obs	health_sd_obs	BRD_mean_num	BRD_sd_num	healthy_mean_chao	health_sd_chao	BRD_mean_chao	BRD_sd_chao
Holman et al., 2015	2015	1	1	NPS	entry	upper	post-weaning	published	mean and sd	5	5	4.74	0.37	3.87	0.7	140.2	49.5	68.6	30.6	NA	NA	NA	NA
Holman et al., 2015	2015	2	1	NPS	end	upper	post-weaning	published	mean and sd	5	5	4.38	0.7	3.75	0.45	98.4	23.3	54.8	21.4	NA	NA	NA	NA
Lima et al., 2016	2016	3	2	NPS	d3	upper	pre-weaning	webplotdigitizer	mean and SEM	64	37	6.36364	2.67045	5.65341	3.0241	80978.3	27173.9	89402.2	25620.3	3293.79	666.667	3548.02	747.458
Lima et al., 2016	2016	4	2	NPS	d14	upper	pre-weaning	webplotdigitizer	mean and SEM	64	37	4.77273	1.42045	4.26136	1.38245	90896.7	46195.7	80978.3	46695.1	2686.44	745.763	2596.05	738.867
Lima et al., 2016	2016	5	2	NPS	d28	upper	pre-weaning	webplotdigitizer	mean and SEM	64	37	5.90909	2.10227	5.12784	1.90086	92527.2	26087	85190.2	27273.3	2827.68	745.763	2977.4	713.092
Lima et al., 2016	2016	6	2	NPS	d35	upper	pre-weaning	webplotdigitizer	mean and SEM	64	37	6.40625	1.81818	6.60511	1.77126	108288	88587	124728	89671.2	3177.97	779.661	3468.93	781.824
Zeineldin et al., 2017	2017	7	3	NPS	entry	upper	post-weaning	published	mean and sd	46	20	NA	NA	NA	NA	30.83	13.39	41.16	23.17	36.58	23.19	49.12	27.57
Zeineldin et al., 2017	2017	8	3	NPS	onset	upper	post-weaning	published	mean and sd	10	22	NA	NA	NA	NA	36.11	33.89	30.88	15.08	42.99	41.65	36.01	17.72
Nicola et al., 2017	2017	9	4	NS	onset	upper	post-weaning	published	Individual	6	5	4.66333	1.90944	5.682	1.742	344.067	167.395	450.92	146.793	624.067	222.103	827.44	222.946
Nicola et al., 2017	2017	10	4	TTA	onset	lower	post-weaning	published	Individual	10	7	1.334	0.67612	1.64571	1.09898	39.27	25.2965	42.5286	51.6602	91.7	55.8667	90.8857	109.785
Johnston et al., 2017	2017	11	5	lung	post-mortem	lower	any	analyzed	analyzed	12	37	3.64314	1.36841	2.11301	1.42286	37.3333	23.9937	21.7297	22.1556	39.2708	25.8211	24.7125	26.7779
Timsit et al., 2018	2018	12	6	TTA	onset	lower	post-weaning	webplotdigitizer	Median, IQR	60	60	2.94	0.67	2.65	0.46	NA	NA	NA	NA	142.11	58.01	65.94	23.18
Timsit et al., 2018	2018	13	6	NS	onset	upper	post-weaning	webplotdigitizer	Median, IQR	60	60	3.39	0.75	2.96	0.56	NA	NA	NA	NA	259.76	263.98	128.75	104.65
McMullen et al., 2019	2019	14	7	NPS	onset	upper	post-weaning	webplotdigitizer	Median, IQR	82	82	1.57	0.7	1.72	0.69	55.01	44.43	41.42	30.64	NA	NA	NA	NA
McMullen et al., 2020	2020	15	8	NPS	entry	upper	post-weaning	webplotdigitizer	Individual values	9	15	1.81345	1.09603	1.79167	0.510703	NA	NA	NA	NA	NA	NA	NA	NA
McMullen et al., 2020	2020	16	8	NPS	onset	upper	post-weaning	webplotdigitizer	Individual values	9	15	1.8597	0.526974	1.70036	0.707523	NA	NA	NA	NA	NA	NA	NA	NA
McMullen et al., 2020	2020	17	8	TTW	onset	lower	post-weaning	webplotdigitizer	Individual values	9	15	1.37527	0.668091	1.46117	0.522103	NA	NA	NA	NA	NA	NA	NA	NA
Zeineldin et al., 2020	2020	18	9	NPS	onset	upper	post-weaning	published	mean and sd	9	9	3.66	0.48	3.07	0.28	NA	NA	NA	NA	77.82	16.4	44.34	7.55
Raabis et al., 2021	2021	19	10	NPS	onset	upper	pre-weaning	published	median, IQR	40	8	2.52	0.76	2.36	0.96	NA	NA	NA	NA	587.86	298.22	415.43	220.88
Centeno-Martinez et al., 2022	2022	20	11	NS	onset	upper	post-weaning	published	mean and SEM	75	57	NA	NA	NA	NA	1039.77	693.804	860.227	664.9	1084.22	743.23	896.59	692.2
Li et al., 2022	2022	21	12	NPS	post-mortem	upper	post-weaning	webplotdigitizer	median, IQR	8	32	4.8	0.31	4.07	0.84	143.46	30.87	96.7	63.98	NA	NA	NA	NA
Li et al., 2022	2022	22	12	trachea	post-mortem	lower	post-weaning	webplotdigitizer	median, IQR	8	31	4.53	0.31	3.58	0.96	110.31	34.99	64.84	63.79	NA	NA	NA	NA
Li et al., 2022	2022	23	12	lung	post-mortem	lower	post-weaning	webplotdigitizer	median, IQR	8	32	4.12	1.56	2.71	0.7	133.32	240.4	22.79	5.59	NA	NA	NA	NA
Zhang et al., 2022	2022	24	13	NS	onset	upper	post-weaning	webplotdigitizer	median, IQR	11	15	7.9603	0.87	7.7542	0.84	2803.45	712.46	2897.94	662.11	3989.73	1163.7	4556.35	1613.26
PRJNA	not published	25	14	NS	onset	upper	post-weaning	analyzed	analyzed	12	28	2.96395	1.04684	3.21997	1.03501	79.5833	43.2823	73.9286	41.3512	183.142	124.109	135.699	80.9839
PRJNA	not published	26	14	NPS	onset	upper	post-weaning	analyzed	analyzed	12	27	2.10364	1.36973	2.05315	1.36615	65.5833	80.021	55.1482	61.0301	113.644	138.738	102.78	100.567
PRJNA	not published	27	14	BAL	onset	lower	post-weaning	analyzed	analyzed	10	22	5.2007	2.06017	5.57781	2.30925	178	97.7832	239.318	239.318	236.1	115.411	347.868	162.819

## Sheet: Suppl. Table 2
Supplementary Table 2. Sparse Estimation of Correlations among Microbiomes (SECOM) Distance Matrix quantifying non-linear relationships between taxa in bovine nasal cavity (full table)
	Values are distance correlation coefficients
	Non-zero values indicate general dependency/relationship between taxa (P < 0.05)
	Zeroes indicate no dependency/relationships exist between taxa
num		ASV1_Mycoplasma_hyorhinis	ASV10_Histophilus_somni	ASV100_Jeotgalicoccus_psychrophilus	ASV1005_Peptococcaceae_Niigata-25	ASV1009_Clostridiaceae_Clostridium	ASV101_Corynebacteriaceae_Corynebacterium	ASV1012_Rhodobacteraceae_Paracoccus	ASV1013_Pseudomonadaceae_unclassified	ASV102_[Weeksellaceae]_unclassified	ASV1027_S24-7_unclassified	ASV103_Rhodobacteraceae_unclassified	ASV1030_PRR-11_unclassified	ASV1033_Succinivibrionaceae_unclassified	ASV1036_[Saprospirales]_unclassified	ASV104_Micrococcaceae_Arthrobacter	ASV105_Olsenella_umbonata	ASV1052_[Paraprevotellaceae]_YRC22	ASV1054_Gordoniaceae_Gordonia	ASV106_Pasteurellaceae_unclassified	ASV1063_Anaerolinaceae_T78	ASV1071_Porphyromonadaceae_Paludibacter	ASV1073_Clostridiaceae_Clostridium	ASV1082_Ruminococcus_bromii	ASV1083_Pseudomonadaceae_Pseudomonas	ASV1084_Spirochaetaceae_Treponema	ASV1086_Flavobacteriaceae_unclassified	ASV109_Carnobacteriaceae_Trichococcus	ASV1095_Bacteria_unclassified	ASV1098_Thermovum_composti	ASV11_Enterobacteriaceae_unclassified	ASV1102_Sphingobacterium_mizutaii	ASV1108_Acholeplasma_laidlawii	ASV111_Prevotellaceae_Prevotella	ASV1110_Pseudomonadaceae_unclassified	ASV1114_Bacteroidaceae_Bacteroides	ASV1120_Sphingobacteriaceae_unclassified	ASV1121_Xanthomonadaceae_Luteimonas	ASV113_Corynebacterium_stationis	ASV1130_Intrasporangiaceae_unclassified	ASV1131_[Tissierellaceae]_unclassified	ASV1137_Porphyromonadaceae_Paludibacter	ASV1149_Rhodobacteraceae_unclassified	ASV115_Moraxellaceae_Acinetobacter	ASV1157_[Weeksellaceae]_unclassified	ASV116_Turicibacteraceae_Turicibacter	ASV1160_Intrasporangiaceae_unclassified	ASV1164_Lachnospiraceae_Coprococcus	ASV117_Alcaligenaceae_Oligella
1	ASV1_Mycoplasma_hyorhinis	1	0.349628	0.324327	0	0	0.424431	0	0	0	0	0	0	0	0	0	0	0	0	0	0	0	0	0	0	0	0	0	0	0	0.346872	0	0	0.269146	0	0	0	0.654912	0	0	0	0	0	0	0	0	0	0	0
2	ASV2_Microbacteriaceae_unclassified	0.28001	0	0	0	0	0	0	0	0	0	0	0	0	0	0	0	0	0	0	0	0	0	0	0	0	0.588734	0	0	0	0	0.742594	0	0	0	0	0.582479	0	0	0	0.665478	0	0	0	0	0	0	0	0
3	ASV3_Pasteurellaceae_Aggregatibacter	0	0	0	0	0	0	0	0	0.330971	0	0.442161	0	0	0.660629	0	0	0	0	0	0	0	0	0	0	0.576425	0.715157	0	0	0	0	0	0	0	0	0.675245	0	0	0	0	0	0	0	0	0	0.296096	0	0.648595	0
4	ASV4_Pasteurellaceae_Mannheimia	0	0	0	0	0	0	0	0	0	0	0	0	0	0	0	0	0	0	0.654292	0	0	0	0	0	0	0	0	0	0	0	0	0	0	0	0	0	0	0	0	0	0	0	0	0	0	0	0	0
5	ASV5_Mycoplasmataceae_Mycoplasma	0.433682	0.52168	0	0	0	0	0	0	0	0	0.414826	0	0	0	0	0	0	0	0	0	0	0	0.674871	0	0	0	0	0	0	0	0	0	0	0	0	0	0	0	0	0	0	0	0	0	0	0	0	0
7	ASV7_Mycoplasmataceae_Mycoplasma	0.338039	0.29776	0	0	0	0.437288	0	0	0	0	0	0	0	0	0	0	0	0	0	0	0	0	0	0	0	0	0	0	0	0	0	0	0	0	0	0	0.691926	0	0.815359	0	0	0	0	0	0	0	0	0
8	ASV8_Pasteurellaceae_Pasteurella	0.28183	0	0	0	0	0	0	0	0	0	0	0	0	0	0	0	0	0	0	0	0	0	0	0	0	0	0	0	0.566485	0	0	0	0.290792	0	0	0	0	0	0	0	0	0	0	0	0	0	0	0
9	ASV9_Moraxellaceae_Moraxella	0	0	0	0	0	0	0	0	0	0	0	0	0	0	0	0	0	0	0	0	0	0	0	0	0	0	0	0	0	0	0	0	0.537582	0	0	0	0	0	0	0	0	0	0	0	0.470098	0	0	0
10	ASV10_Histophilus_somni	0.349628	1	0	0	0	0	0	0	0	0	0	0	0	0	0	0	0	0	0	0	0	0	0	0	0	0	0	0	0	0	0	0	0	0	0	0	0	0	0	0	0	0	0	0	0	0	0	0
11	ASV11_Enterobacteriaceae_unclassified	0.346872	0	0	0	0	0	0	0	0	0	0	0	0	0	0	0	0.577475	0	0	0.548144	0	0	0	0	0	0	0	0	0	1	0	0	0	0	0	0	0	0	0	0	0	0	0	0	0	0	0	0
12	ASV12_Moraxellaceae_Enhydrobacter	0	0	0	0	0	0	0	0	0	0	0	0	0	0	0	0	0	0	0	0	0	0	0	0	0	0	0	0	0	0	0	0	0	0	0	0	0	0	0	0	0	0	0	0	0	0	0.541529	0
13	ASV13_Leptotrichiaceae_unclassified	0	0.487137	0	0	0	0	0	0	0	0	0	0	0	0	0	0	0	0	0	0	0	0	0	0	0	0	0	0	0	0	0	0	0	0	0	0	0	0	0	0	0	0	0	0	0	0	0	0
14	ASV14_Moraxellaceae_unclassified	0	0	0.340256	0	0	0	0	0	0	0	0	0	0	0	0	0.369364	0	0	0	0	0	0	0	0	0	0	0	0	0	0	0	0.841663	0	0	0	0	0	0	0	0	0	0	0	0	0	0	0	0
15	ASV15_Streptococcaceae_Streptococcus	0	0	0	0	0	0.522941	0	0	0	0	0	0	0	0	0	0	0	0	0	0	0	0	0	0	0	0	0	0	0	0	0	0	0	0	0	0	0	0	0	0	0	0	0	0	0	0	0	0
16	ASV16_Psychrobacter_celer	0	0	0	0	0	0	0	0	0	0	0	0	0	0	0	0	0	0	0	0	0	0	0	0	0	0	0	0	0	0	0	0	0	0	0	0	0	0	0	0	0	0	0	0	0	0	0	0.537372
17	ASV17_Pasteurellaceae_Mannheimia	0	0.590848	0	0	0	0	0	0	0	0	0.645538	0	0	0	0	0	0	0	0	0	0	0	0	0	0	0	0	0	0	0	0	0	0	0	0	0	0	0	0	0	0	0	0	0	0	0	0	0
18	ASV18_[Weeksellaceae]_unclassified	0	0	0	0	0	0	0	0	0	0	0	0	0	0	0.553661	0	0	0	0	0	0	0	0	0	0	0	0	0	0	0	0	0	0	0	0	0	0	0	0	0	0	0	0	0	0	0	0	0
19	ASV19_Corynebacteriaceae_Corynebacterium	0.379826	0	0.308397	0	0	0	0	0	0	0.481317	0	0	0	0	0	0	0	0	0	0	0	0	0	0	0	0	0.263836	0	0	0.468897	0	0	0.307053	0	0	0	0	0	0	0	0	0	0.29001	0	0.314516	0	0	0
20	ASV20_Fusobacteriaceae_Fusobacterium	0	0	0	0	0	0	0	0	0	0	0	0	0	0	0	0	0	0	0	0	0	0	0	0	0	0	0	0	0	0	0	0	0	0	0	0	0	0	0	0	0	0	0	0	0	0	0	0
21	ASV21_Moraxellaceae_Moraxella	0.696416	0.660547	0	0	0	0	0	0	0	0	0	0	0	0	0	0	0	0	0	0	0	0	0	0	0	0	0	0	0	0	0	0	0	0	0	0	0	0	0	0	0	0	0	0	0	0	0	0
23	ASV23_Moraxellaceae_unclassified	0	0	0	0	0	0	0	0	0	0	0	0	0	0	0	0	0	0	0	0	0	0	0	0	0	0	0	0	0	0	0	0	0	0	0	0	0	0	0	0	0	0	0	0	0	0	0	0
24	ASV24_Veillonellaceae_Phascolarctobacterium	0.280222	0	0	0	0	0	0	0	0	0.543931	0.24398	0	0	0	0	0	0	0	0.362112	0	0	0	0	0	0	0	0	0.505819	0	0.392004	0	0.546359	0.264459	0.521157	0	0	0	0	0	0	0.595244	0	0	0.587225	0	0	0	0
25	ASV25_[Weeksellaceae]_unclassified	0	0	0	0	0	0	0	0	0	0	0	0	0	0	0	0	0	0	0	0	0	0	0	0	0	0	0	0	0	0	0	0	0	0	0	0	0	0	0	0	0	0	0	0	0	0	0	0
26	ASV26_Vibrionales_unclassified	0	0	0	0	0	0	0	0	0	0	0	0	0	0	0	0	0	0	0	0	0	0	0	0	0	0	0	0	0	0	0	0	0	0	0	0	0	0	0	0	0	0	0	0	0	0	0	0
27	ASV27_Vibrio_metschnikovii	0	0	0	0	0	0	0.52753	0	0	0	0	0	0	0	0.218862	0	0.498627	0	0	0	0	0	0	0	0	0.499371	0	0	0	0	0	0	0	0	0	0	0	0	0	0	0.497445	0	0	0	0	0	0	0
28	ASV28_Mycoplasmataceae_Ureaplasma	0	0	0	0	0	0.72196	0	0	0.614039	0	0	0	0	0	0	0	0	0	0	0	0	0	0	0	0	0	0	0	0	0	0	0	0	0	0	0	0	0	0	0	0	0	0	0	0	0	0	0
30	ASV30_Flavobacteriaceae_unclassified	0	0	0.359849	0	0	0	0	0	0	0.667334	0.2852	0	0	0.752048	0.326635	0	0	0	0	0	0	0	0	0	0	0	0.425545	0	0	0	0	0	0.274218	0.491299	0	0	0	0	0	0	0	0	0.514207	0	0	0	0	0.318237
32	ASV32_Corynebacteriaceae_Corynebacterium	0.417259	0	0.517922	0	0	0.344581	0	0	0.311124	0	0	0	0	0.451089	0.247994	0	0	0	0	0	0	0	0	0	0	0	0.541703	0	0	0	0	0	0.358745	0	0	0	0	0	0.569539	0	0	0	0.313234	0	0.289008	0	0	0
34	ASV34_Bifidobacterium_pseudolongum	0.300321	0.295282	0.283025	0	0	0.339143	0	0	0	0	0	0	0	0	0	0.245374	0	0	0	0	0	0	0	0	0	0	0.28229	0	0.480115	0.371879	0	0	0	0	0.653087	0	0	0	0.596538	0	0	0	0	0	0.280535	0	0	0
35	ASV35_Carnobacteriaceae_unclassified	0	0	0	0	0	0	0	0	0	0	0	0	0	0	0.436487	0	0	0	0	0	0	0	0	0	0	0	0	0	0	0	0	0	0	0	0	0	0	0	0	0	0	0	0	0	0	0	0	0
36	ASV36_Chitinophagaceae_unclassified	0	0	0	0	0	0	0	0	0	0	0	0	0	0	0	0	0	0	0	0	0	0	0	0	0	0	0	0	0	0	0	0	0	0	0	0	0	0	0	0	0	0	0	0	0	0	0	0
37	ASV37_Ruminococcaceae_unclassified	0.307754	0	0	0	0	0.345921	0	0	0.288464	0	0	0	0	0	0	0	0	0	0.299031	0	0	0	0	0	0.599447	0	0	0	0	0.463216	0	0	0	0.505164	0	0	0	0	0	0	0.474723	0	0	0	0.348391	0	0	0
38	ASV38_Moraxellaceae_Moraxella	0	0	0	0	0	0	0	0	0	0	0	0	0	0	0	0	0	0	0	0	0	0	0	0	0	0	0	0	0	0	0	0	0	0	0	0	0	0	0	0	0	0	0	0	0	0	0	0
39	ASV39_Corynebacteriaceae_Corynebacterium	0	0	0.489293	0	0	0	0	0	0.292518	0	0	0	0	0	0.40415	0	0	0	0	0	0	0	0	0	0	0	0.531791	0	0	0.484846	0	0	0.411109	0	0	0	0	0	0	0	0	0	0	0	0	0	0	0
40	ASV40_[Weeksellaceae]_unclassified	0	0	0	0	0	0	0	0	0	0	0	0	0	0	0	0	0	0	0	0	0	0	0	0	0	0	0	0	0	0	0	0	0.690504	0	0	0	0	0	0	0	0	0	0	0	0	0	0	0
43	ASV43_Moraxellaceae_Moraxella	0	0	0	0	0	0	0	0	0	0	0	0	0	0	0	0	0	0	0	0	0	0	0	0	0	0	0	0	0	0	0	0	0	0	0	0	0	0	0	0	0	0	0	0	0	0	0.831013	0
44	ASV44_Moraxellaceae_Enhydrobacter	0	0	0	0	0	0.775711	0	0	0	0	0.712395	0	0	0	0	0	0	0	0	0	0	0	0	0	0	0	0	0	0	0	0	0	0	0	0	0	0	0	0	0	0	0	0	0	0	0	0	0
45	ASV45_Bacteroidaceae_Bacteroides	0	0	0	0	0	0	0	0	0	0	0.552213	0	0	0	0	0	0	0	0	0	0	0	0	0	0	0	0	0	0	0	0	0	0	0	0	0	0	0	0	0	0	0	0	0	0	0	0	0
46	ASV46_Corynebacteriaceae_Corynebacterium	0	0	0.424042	0	0	0	0	0	0.291389	0	0	0.57663	0	0	0.410547	0	0	0	0	0	0	0	0	0	0	0	0.449688	0	0	0	0	0	0	0	0	0	0	0	0	0	0	0	0	0	0	0	0	0
47	ASV47_Prevotella_copri	0	0	0.465087	0	0	0	0	0	0	0	0	0	0	0	0	0	0	0	0	0	0	0	0	0	0	0	0	0	0	0	0	0	0	0	0	0	0	0	0	0	0	0	0	0	0	0	0	0
50	ASV50_Psychrobacter_sanguinis	0	0	0.491195	0.846009	0	0	0	0	0.479411	0	0	0	0	0	0.301841	0	0	0	0	0	0	0	0	0	0	0	0.585098	0	0	0	0	0	0	0	0	0	0	0	0	0	0	0	0.353648	0	0.328212	0	0	0
51	ASV51_Moraxellaceae_Acinetobacter	0	0	0	0	0	0	0	0	0	0	0	0	0	0	0	0	0	0	0	0	0	0	0	0	0	0	0	0	0	0	0	0.583236	0	0	0	0	0	0	0	0	0	0	0	0	0	0	0	0
53	ASV53_Neisseriaceae_unclassified	0	0	0	0	0	0	0	0	0	0	0	0	0	0	0	0	0	0	0	0	0	0	0	0	0	0	0	0	0	0	0	0	0	0	0	0	0	0	0	0	0	0	0	0	0	0	0	0
54	ASV54_Mycoplasmataceae_Mycoplasma	0.350259	0.334505	0	0	0	0	0	0	0	0	0	0	0	0	0	0	0	0	0	0.544126	0	0	0	0	0	0	0	0	0	0	0	0	0	0	0	0	0	0	0	0	0	0	0	0	0	0	0	0
57	ASV57_Acinetobacter_lwoffii	0	0	0.495462	0	0	0	0	0	0	0.539349	0	0	0	0	0.458776	0	0	0	0	0	0	0	0	0	0	0	0.607362	0	0	0.490257	0	0	0.351468	0.580136	0	0	0	0	0	0	0	0	0	0	0	0	0	0
58	ASV58_Veillonellaceae_Megasphaera	0	0	0	0	0	0	0	0	0	0	0	0	0	0	0	0	0	0	0	0	0	0	0	0	0	0	0	0	0	0	0	0	0	0	0	0	0	0	0	0	0	0	0	0	0	0	0	0.675037
60	ASV60_Planococcaceae_Solibacillus	0	0	0.500257	0	0	0	0	0	0	0	0	0	0	0.738031	0	0.387116	0	0	0	0	0	0	0	0	0	0	0.468666	0	0	0	0	0.674206	0	0	0.955553	0	0.719224	0	0	0	0	0	0	0	0	0	0	0
63	ASV63_[Paraprevotellaceae]_YRC22	0	0	0.580139	0	0	0.287632	0	0	0	0	0	0	0	0	0.451029	0	0	0	0	0	0	0	0	0	0.61487	0	0.502608	0	0	0	0	0	0	0	0	0	0	0	0	0	0	0	0	0.595275	0	0	0	0
64	ASV64_Ruminococcaceae_unclassified	0	0	0	0	0	0	0	0	0	0	0	0	0	0	0	0	0	0	0	0	0	0	0	0	0	0	0	0	0	0	0	0	0	0	0	0	0	0	0	0	0	0	0	0	0	0	0	0.382407
65	ASV65_Moraxellaceae_Acinetobacter	0.356681	0	0.402832	0	0	0.339289	0.636445	0	0	0	0.391473	0	0	0	0	0	0	0	0	0	0	0	0	0	0	0	0	0	0	0	0	0	0	0	0	0	0	0.444931	0	0	0.679521	0	0	0	0	0	0	0
69	ASV69_SR1_unclassified	0.405318	0	0.594421	0	0	0	0	0	0.343163	0	0.366289	0	0	0	0	0	0	0	0	0.608766	0	0	0.683457	0	0	0	0.428361	0	0	0	0	0.69585	0	0	0	0	0	0.447286	0	0	0	0	0	0	0	0	0	0
70	ASV70_Clostridium_celatum	0.260706	0	0	0	0	0.295283	0	0	0.267764	0	0	0	0	0	0	0.223791	0	0	0.34254	0	0	0	0	0	0	0	0.274006	0.52247	0	0.365622	0	0.483387	0	0.657837	0	0	0	0	0	0	0	0	0	0	0.390535	0	0.550735	0
71	ASV71_[Weeksellaceae]_Weeksella	0	0	0.383744	0	0	0.406137	0.63769	0	0.296575	0	0	0	0	0	0.510129	0	0	0	0	0	0	0	0	0	0	0	0.534976	0	0	0	0	0	0.325283	0	0	0	0	0	0	0	0	0	0.396733	0	0	0	0	0.273511
72	ASV72_Lactobacillaceae_Lactobacillus	0	0	0	0	0	0.612516	0	0	0.640011	0	0	0	0	0	0.487175	0.385351	0	0	0	0	0	0	0	0	0	0	0	0	0	0	0	0	0	0	0	0	0	0	0	0	0	0	0	0	0.569497	0	0	0
73	ASV73_Ruminococcaceae_unclassified	0	0	0	0	0.605931	0	0.701125	0	0	0	0	0	0	0	0	0	0	0	0	0	0	0	0	0	0	0	0	0	0	0	0	0	0	0	0.800845	0	0	0	0	0	0.707881	0	0	0	0	0	0	0.334649
74	ASV74_Prevotella_copri	0	0	0.276672	0	0	0	0	0	0.321121	0	0	0	0	0	0	0.290049	0	0.834664	0	0	0	0	0	0.455027	0	0	0.281864	0	0	0	0	0	0.53673	0	0	0	0	0	0	0	0	0	0	0	0	0	0	0
75	ASV75_Peptostreptococcaceae_unclassified	0	0	0	0	0	0	0	0	0.298414	0	0	0	0	0	0	0	0	0	0	0	0	0	0	0	0	0	0	0	0	0	0	0	0	0	0.584659	0	0	0	0	0	0	0	0	0	0.374128	0	0	0
76	ASV76_Carnobacteriaceae_Trichococcus	0.332194	0	0.647798	0.604661	0	0.346288	0	0	0.267453	0	0	0	0	0	0.462849	0	0	0	0	0	0.567605	0	0	0	0	0	0.642435	0	0	0	0	0	0.421127	0	0	0	0	0	0	0	0	0	0.343666	0	0	0	0	0
77	ASV77_Mycoplasmataceae_Mycoplasma	0.476413	0	0	0	0	0.635543	0	0	0	0	0	0	0	0	0	0	0	0	0	0	0	0	0	0	0	0	0	0	0	0	0	0	0	0	0	0	0	0	0	0	0	0	0	0	0	0	0	0
79	ASV79_[Weeksellaceae]_Wautersiella	0	0	0.314531	0.594432	0.605196	0	0	0	0.39484	0	0.464325	0.583498	0	0	0	0	0	0	0	0	0	0	0	0	0	0	0.274304	0	0	0.351028	0	0	0	0	0	0	0	0	0	0.686849	0	0	0.296666	0	0	0	0	0
81	ASV81_Chitinophagaceae_unclassified	0	0	0	0	0	0	0	0	0	0	0	0	0	0	0	0	0	0	0	0	0	0	0	0	0	0	0	0	0	0	0	0	0.425614	0	0	0	0	0	0	0	0	0	0	0	0	0	0	0
82	ASV82_Streptococcus_luteciae	0	0	0	0	0	0	0	0	0	0	0	0	0	0	0	0	0	0	0	0	0	0	0	0	0	0	0	0	0	0	0	0	0	0	0	0	0	0	0	0	0	0	0	0	0	0	0	0
83	ASV83_Streptococcus_alactolyticus	0	0	0	0	0	0	0	0	0	0	0	0	0	0	0	0	0	0	0	0	0	0	0	0	0	0	0	0	0	0	0	0	0	0	0	0	0	0	0	0	0	0	0	0	0	0	0	0
84	ASV84_Halomonadaceae_Halomonas	0	0	0	0	0	0	0	0	0	0	0	0	0	0	0	0	0	0	0	0	0	0	0	0	0	0	0	0	0	0	0	0	0	0	0	0	0	0	0	0	0	0.667794	0	0	0	0	0	0
85	ASV85_Methanobacteriaceae_Methanobrevibacter	0	0	0	0	0	0	0	0	0	0.518691	0	0	0	0	0	0.275258	0	0	0.397036	0	0	0	0	0	0	0	0	0	0	0	0	0	0	0	0	0	0	0	0	0	0	0	0	0	0	0	0	0
87	ASV87_Prevotella_stercorea	0	0	0	0	0	0	0	0	0	0	0	0	0	0	0	0	0	0	0	0	0	0	0	0	0	0	0	0	0	0	0	0	0	0	0	0	0	0	0	0	0	0	0	0	0	0	0	0
88	ASV88_Planococcaceae_unclassified	0	0	0.566723	0	0	0.436087	0	0	0.350967	0	0.357535	0	0	0	0	0	0	0	0	0	0	0	0	0	0	0	0.341008	0	0	0	0	0	0.445743	0	0	0	0	0	0	0	0	0	0	0	0.251085	0	0	0
90	ASV90_Aerococcaceae_unclassified	0	0	0.280294	0.691676	0	0	0	0	0.317151	0	0	0	0	0	0	0	0	0	0.340192	0	0	0	0	0	0	0	0	0	0	0	0	0	0	0	0	0	0	0	0	0.540205	0	0	0	0	0.297131	0	0.634164	0
95	ASV95_Prevotellaceae_Prevotella	0	0	0	0	0	0	0	0	0	0.548138	0.316863	0	0	0	0	0	0	0	0	0	0	0	0	0	0	0	0	0	0	0	0	0	0	0	0	0	0	0	0	0.719243	0	0	0	0	0	0	0	0
99	ASV99_Ruminococcaceae_unclassified	0	0	0	0	0	0	0	0	0	0	0.314877	0	0	0	0	0	0	0	0	0	0	0	0	0	0	0	0	0	0	0	0	0	0.369861	0	0	0	0.63859	0	0	0	0	0	0	0	0	0	0	0
100	ASV100_Jeotgalicoccus_psychrophilus	0.324327	0	1	0	0	0.440889	0	0	0.384952	0	0.328088	0	0	0	0.399541	0	0	0	0	0	0	0	0	0.573655	0	0	0.599737	0	0	0	0	0	0.372625	0	0	0	0.759372	0	0	0	0	0	0	0	0	0	0	0
101	ASV101_Corynebacteriaceae_Corynebacterium	0.424431	0	0.440889	0	0	1	0	0	0.343827	0	0	0	0	0	0	0.453795	0	0	0	0	0	0	0	0	0	0	0	0	0	0	0	0	0.325062	0	0	0	0	0.361523	0	0	0	0	0	0	0	0	0	0
102	ASV102_[Weeksellaceae]_unclassified	0	0	0.384952	0	0	0.343827	0	0	1	0	0.329524	0	0	0	0.298583	0	0	0	0	0	0	0	0	0	0	0	0.430815	0	0	0	0	0	0.34891	0	0	0	0	0.296728	0	0.673967	0	0	0	0	0	0	0	0
103	ASV103_Rhodobacteraceae_unclassified	0	0	0.328088	0	0	0	0	0	0.329524	0	1	0	0	0	0	0	0	0	0	0	0.559204	0	0	0	0	0	0	0	0	0	0	0	0	0	0	0	0	0	0	0	0	0	0	0	0	0	0	0.264381
104	ASV104_Micrococcaceae_Arthrobacter	0	0	0.399541	0	0	0	0	0	0.298583	0	0	0	0	0	1	0	0	0	0	0	0	0	0	0	0	0	0.534866	0.524464	0	0	0	0	0.36936	0	0	0	0	0	0	0	0	0	0	0	0	0.6999	0	0
105	ASV105_Olsenella_umbonata	0	0	0	0	0	0.453795	0	0	0	0.555655	0	0	0	0	0	1	0	0	0	0	0	0	0	0.633181	0	0	0	0	0	0	0	0	0	0	0	0	0	0	0	0	0	0	0	0	0	0	0	0
106	ASV106_Pasteurellaceae_unclassified	0	0	0	0	0	0	0	0	0	0	0	0	0	0	0	0	0	0	1	0	0	0	0.593568	0	0	0	0	0	0	0	0	0	0	0	0	0	0.672734	0	0	0	0	0	0	0	0	0	0	0
109	ASV109_Carnobacteriaceae_Trichococcus	0	0	0.599737	0	0	0	0	0.592754	0.430815	0	0	0	0	0	0.534866	0	0	0	0	0	0	0	0	0	0	0	1	0	0	0	0	0	0.361177	0	0	0	0.678919	0	0	0	0	0	0.415476	0	0	0	0	0
111	ASV111_Prevotellaceae_Prevotella	0.269146	0	0.372625	0	0	0.325062	0	0.535672	0.34891	0	0	0	0	0	0.36936	0	0	0	0	0	0	0	0	0	0	0	0.361177	0	0	0	0	0	1	0	0	0	0	0	0	0	0	0	0	0	0	0	0	0
113	ASV113_Corynebacterium_stationis	0	0	0	0	0	0.361523	0	0	0.296728	0	0	0	0	0	0	0	0	0	0	0	0	0	0	0	0	0	0	0	0	0	0	0	0	0	0	0	0	1	0	0	0	0	0	0	0	0	0	0
115	ASV115_Moraxellaceae_Acinetobacter	0	0	0	0	0	0	0.539244	0	0	0	0	0.622913	0	0.810487	0	0	0	0	0	0	0.623493	0	0	0	0	0	0.415476	0	0	0	0	0	0	0	0	0	0	0	0	0	0	0	1	0	0	0	0	0
116	ASV116_Turicibacteraceae_Turicibacter	0	0	0	0	0	0	0	0	0	0	0	0.579869	0	0	0	0	0	0	0	0	0	0	0	0	0	0	0	0	0	0	0	0	0	0	0	0	0	0	0	0	0	0	0	0.606875	1	0	0	0
117	ASV117_Alcaligenaceae_Oligella	0	0	0	0	0	0	0	0	0	0	0.264381	0	0	0	0	0	0	0	0	0	0	0.670345	0	0	0	0	0	0	0	0	0	0	0	0	0	0	0	0	0	0	0	0	0	0	0	0	0	1
118	ASV118_Staphylococcus_sciuri	0.322847	0	0.396709	0	0	0.314287	0	0	0.304627	0	0	0	0	0	0	0	0	0	0	0	0	0	0.661518	0	0	0	0.428428	0	0	0	0	0.814586	0	0	0	0	0	0	0	0	0	0	0	0	0	0	0.619024	0
119	ASV119_Comamonadaceae_Comamonas	0.355745	0	0.444439	0	0	0	0.661521	0	0	0	0.417498	0	0	0	0	0	0.497236	0	0	0	0	0	0	0	0	0	0	0	0	0	0	0	0.346454	0	0	0	0	0	0	0	0	0	0	0	0	0	0	0
121	ASV121_Veillonellaceae_Phascolarctobacterium	0	0	0.492096	0	0	0	0	0	0	0	0	0	0.665212	0	0	0	0	0	0	0	0	0	0	0	0	0	0.372381	0	0	0	0	0	0	0	0	0	0	0	0	0	0	0	0.377967	0	0	0	0	0.261677
122	ASV122_Pseudomonadaceae_Pseudomonas	0	0	0	0	0	0	0	0	0	0	0	0	0	0	0	0	0	0	0	0	0.716383	0	0	0	0	0	0.336538	0	0	0	0	0	0	0	0	0	0	0	0	0	0	0	0	0	0	0	0	0
123	ASV123_Enterobacteriaceae_unclassified	0	0	0	0	0	0	0	0	0	0	0	0	0	0	0	0	0	0	0	0	0	0	0	0	0	0	0	0	0	0	0	0	0	0	0	0	0	0	0	0	0	0	0	0	0	0	0	0
126	ASV126_[Paraprevotellaceae]_[Prevotella]	0	0	0	0	0	0	0	0	0	0	0	0	0	0	0	0	0	0	0	0	0	0	0	0	0	0	0	0	0	0	0	0	0.402404	0	0	0	0.554705	0	0	0.494553	0	0	0	0	0	0	0	0
129	ASV129_Clostridiaceae_unclassified	0	0	0	0	0	0	0	0	0	0	0	0	0	0	0	0	0	0	0	0	0	0	0	0	0	0	0	0	0	0	0	0	0	0	0	0	0	0	0	0	0	0	0	0	0	0	0	0
130	ASV130_Clostridiales_unclassified	0	0	0	0	0	0	0	0	0.38385	0	0	0	0	0	0	0	0	0	0	0	0	0	0	0	0	0	0	0.639021	0	0	0	0	0.299822	0	0	0	0	0	0	0	0	0	0	0	0	0	0	0
131	ASV131_S24-7_unclassified	0	0	0	0	0	0	0	0	0	0	0	0	0	0	0	0	0	0	0.486558	0	0	0	0	0	0	0	0	0	0	0	0	0	0.37597	0	0	0	0	0	0	0	0	0	0	0	0	0	0	0
133	ASV133_Veillonellaceae_vadinHB04	0.400688	0	0	0	0	0	0	0	0	0	0	0	0	0	0.362604	0	0	0	0	0	0	0	0	0	0	0	0	0	0	0	0	0	0	0	0	0	0	0	0	0	0	0	0	0	0	0	0	0
134	ASV134_Lactobacillaceae_Lactobacillus	0	0	0	0	0	0	0	0	0.593152	0	0	0	0	0	0.506773	0	0	0	0	0	0	0	0	0	0	0	0	0	0	0	0	0	0	0	0	0	0	0	0	0	0	0	0	0	0	0	0	0
135	ASV135_Comamonadaceae_Comamonas	0	0	0	0	0	0	0	0	0	0	0	0	0	0	0.419402	0	0	0	0	0	0	0	0	0	0	0	0.447565	0	0	0	0	0	0	0	0	0	0	0.369611	0	0	0.746658	0	0	0	0	0	0	0
136	ASV136_Porphyromonadaceae_unclassified	0.307911	0	0.278637	0	0.58003	0	0	0	0	0	0	0	0	0	0.260028	0	0	0	0	0	0	0.632381	0	0	0	0	0	0.507109	0	0	0	0	0	0	0	0	0	0.342191	0	0	0	0	0	0	0.237499	0	0	0
137	ASV137_Actinomycetaceae_N09	0	0	0	0	0.668865	0	0	0	0	0	0	0	0.63359	0	0	0	0	0	0	0	0	0	0	0	0	0	0.36935	0	0	0	0	0.583441	0.372213	0	0	0.636996	0	0	0	0	0	0	0	0	0	0	0	0
138	ASV138_Pseudomonadaceae_Pseudomonas	0	0	0.422769	0	0	0	0	0	0	0	0	0	0.680343	0.552166	0	0.340378	0	0	0	0	0	0	0	0	0	0	0.358362	0	0	0	0	0	0	0	0	0	0	0	0	0	0	0	0	0	0	0	0	0
140	ASV140_Pusillimonas_noertemannii	0	0	0	0	0	0.371506	0	0	0	0	0	0	0	0	0	0	0	0	0	0	0	0	0	0	0	0	0.433496	0	0	0	0	0	0.396712	0	0	0	0	0	0	0	0.726049	0	0	0	0	0	0	0
141	ASV141_Prevotellaceae_Prevotella	0	0	0	0	0	0	0	0	0.322426	0	0.286258	0	0	0	0	0	0	0	0	0	0	0	0.599614	0	0	0	0.374031	0	0	0	0	0	0.546989	0	0	0	0	0	0	0	0	0	0	0	0	0	0	0
144	ASV144_Arcobacter_cryaerophilus	0	0	0	0	0	0	0	0	0	0	0	0	0	0	0	0	0	0	0	0	0	0	0	0	0	0	0.376671	0	0	0	0	0	0.351405	0	0	0	0	0	0	0	0	0	0	0	0	0	0.615633	0
145	ASV145_Veillonellaceae_Anaerovibrio	0	0	0.438387	0	0	0	0	0	0	0	0	0	0	0	0	0	0	0	0	0	0	0	0	0	0	0	0	0	0	0	0	0	0	0	0	0	0	0	0	0	0	0	0	0	0	0	0	0
152	ASV152_[Clostridium]_sordellii	0	0	0	0	0	0	0	0	0.417223	0	0	0	0	0	0	0	0	0	0	0	0	0	0	0	0.782177	0	0	0	0	0	0	0.835265	0	0	0	0	0	0	0	0	0	0	0	0	0	0.806818	0	0
154	ASV154_Rhizobiaceae_Agrobacterium	0.442462	0.609246	0	0	0	0	0	0	0.447237	0	0	0.601085	0	0	0	0	0	0	0	0	0	0	0	0	0	0	0	0	0	0	0	0	0	0	0	0	0	0	0	0.632531	0	0	0	0	0	0	0	0
156	ASV156_[Weeksellaceae]_Wautersiella	0	0	0	0	0	0	0	0	0	0	0	0	0	0	0	0	0	0	0	0	0	0	0	0	0	0	0	0	0	0	0	0	0	0	0	0	0	0	0	0	0	0	0.459355	0	0	0	0	0
157	ASV157_Jonesiaceae_unclassified	0	0	0.402635	0	0	0	0	0	0	0	0.411823	0	0	0	0.332473	0.290126	0	0	0	0	0	0	0	0	0	0	0	0	0	0	0	0	0	0	0	0	0	0	0	0	0	0	0	0	0	0	0	0.250913
158	ASV158_Clostridiales_unclassified	0	0	0.482264	0.596723	0	0	0	0	0	0	0	0	0	0	0	0	0	0	0	0	0	0	0	0	0.73958	0	0.359644	0	0	0.611937	0.746363	0.62672	0	0	0	0	0	0	0	0	0.72404	0	0	0	0	0	0	0
159	ASV159_Dietziaceae_Dietzia	0	0	0	0.740077	0	0	0	0	0	0	0	0	0	0	0	0	0	0	0	0	0	0	0	0	0	0	0	0	0	0	0	0	0	0	0	0	0	0	0	0	0	0	0	0	0	0	0	0
161	ASV161_Lachnospiraceae_Butyrivibrio	0	0.402371	0	0	0	0	0	0	0	0	0	0.835795	0	0	0.40063	0	0	0	0	0	0	0	0	0	0	0	0	0	0	0	0	0	0.34836	0	0	0.588136	0	0	0	0	0	0	0	0	0.355542	0	0	0
165	ASV165_Sphingobacteriaceae_unclassified	0	0	0	0.469125	0	0.300762	0	0	0.398611	0.557547	0.345927	0.613224	0	0	0	0	0	0	0	0	0	0	0	0	0	0	0	0	0	0	0	0	0	0	0	0	0	0	0	0	0	0	0	0	0	0	0	0
168	ASV168_Enterococcaceae_unclassified	0.364986	0	0.303446	0	0	0	0	0	0.424222	0	0	0	0	0	0	0	0	0	0.594054	0	0	0	0	0	0	0	0.523475	0	0	0	0	0	0	0	0	0	0	0	0	0	0	0	0	0	0	0	0	0.301798
171	ASV171_[Mogibacteriaceae]_Mogibacterium	0	0	0	0	0	0	0	0	0	0	0	0	0	0	0	0	0	0	0	0	0	0	0	0	0	0	0	0	0	0	0	0	0	0	0	0	0	0	0	0	0	0	0	0	0	0	0	0
172	ASV172_Prevotella_copri	0	0	0	0	0	0	0	0	0	0	0	0	0	0	0	0	0	0	0	0	0	0	0	0	0	0	0	0	0	0	0	0	0	0	0	0	0	0	0	0	0	0	0	0	0	0	0	0
173	ASV173_Idiomarinaceae_Idiomarina	0	0	0	0	0	0	0	0	0	0	0	0	0	0	0	0	0	0	0	0	0	0	0	0	0	0	0	0	0	0	0	0	0	0	0	0	0	0	0	0	0	0	0	0	0	0	0	0
175	ASV175_Clostridiaceae_Clostridium	0.436859	0	0	0	0	0.406201	0	0	0.440089	0	0	0	0	0	0.364299	0	0	0	0	0	0.663914	0	0	0	0	0	0.450151	0	0	0	0	0	0	0	0	0	0	0	0	0	0	0	0	0.768334	0.356403	0	0	0
176	ASV176_Dietziaceae_Dietzia	0	0	0	0	0	0.365107	0	0	0.295214	0	0	0	0	0	0	0	0	0	0	0	0	0	0	0	0	0	0	0	0	0	0	0	0	0	0	0	0.72195	0	0	0.596651	0	0	0	0	0	0	0	0
179	ASV179_JG30-KF-CM45_unclassified	0	0	0	0	0	0	0	0	0	0	0.426835	0	0	0	0	0	0	0	0	0	0	0	0	0	0	0	0	0	0	0.439447	0	0	0	0	0	0	0	0	0	0	0	0	0	0.676151	0.403612	0.618876	0	0
183	ASV183_Intrasporangiaceae_unclassified	0	0	0	0	0	0	0	0	0	0	0	0	0	0.651692	0	0	0	0	0	0.707792	0	0	0	0	0	0	0	0	0	0	0	0	0	0	0	0	0	0	0	0	0	0	0	0	0	0	0	0
184	ASV184_Moraxellaceae_Acinetobacter	0	0	0	0	0	0	0	0	0	0	0	0.638116	0	0	0	0	0	0	0	0.648424	0	0	0	0	0	0	0	0	0	0	0	0	0.391435	0	0	0	0	0.45071	0	0	0	0.840534	0	0	0	0	0	0
185	ASV185_Prevotellaceae_Prevotella	0	0	0	0	0	0	0	0	0	0	0	0	0	0	0	0	0	0	0	0	0.574945	0	0	0	0	0	0	0	0	0	0	0	0.309675	0.578505	0	0	0	0	0	0	0	0.785257	0	0	0	0	0	0
186	ASV186_Streptococcaceae_Streptococcus	0	0	0	0	0	0	0	0	0	0	0.502266	0	0	0.491999	0.305468	0	0	0	0	0	0	0	0	0	0	0.660927	0	0	0	0	0	0	0	0	0	0	0	0	0	0	0	0	0	0	0.300933	0	0	0
188	ASV188_Dietziaceae_Dietzia	0	0	0.366206	0	0	0	0	0	0.27704	0	0	0	0.570706	0	0	0	0	0	0	0	0	0	0	0	0	0	0	0	0	0	0	0	0	0	0	0	0	0	0	0	0	0	0	0	0.40667	0	0	0
189	ASV189_Aerococcaceae_Aerococcus	0	0	0	0	0	0	0	0	0	0	0	0	0	0	0	0	0	0	0	0	0	0	0	0	0	0	0	0	0	0	0.622168	0	0	0	0	0.647298	0	0	0	0	0	0	0	0	0	0	0	0
190	ASV190_Porphyromonadaceae_unclassified	0	0	0	0	0	0	0	0	0	0	0	0	0	0	0	0	0	0	0	0	0	0	0	0	0	0	0.330634	0	0	0	0	0	0	0	0	0	0	0	0	0	0	0.537242	0	0	0	0	0	0
191	ASV191_[Paraprevotellaceae]_CF231	0	0	0	0	0	0	0	0	0	0	0	0	0	0	0	0	0	0	0	0	0	0	0	0	0	0	0	0	0	0	0	0	0	0	0	0	0	0	0	0	0	0	0	0	0	0	0	0
193	ASV193_Cryomorphaceae_Fluviicola	0	0	0	0	0	0	0	0	0	0	0.315271	0	0	0	0	0.364388	0	0	0	0	0	0	0	0	0	0	0	0	0	0	0	0	0	0	0	0	0.610433	0	0	0	0	0	0.391711	0	0	0	0.623486	0
194	ASV194_Promicromonosporaceae_unclassified	0	0	0.445756	0	0	0.462647	0	0	0	0	0	0	0	0	0	0	0	0	0.387163	0	0	0	0	0	0	0	0.42241	0	0	0	0	0	0	0	0	0	0	0	0	0	0	0	0	0	0	0	0	0
196	ASV196_[Tissierellaceae]_Helcococcus	0	0	0	0	0	0.318406	0	0	0.449157	0	0	0	0	0	0	0	0	0	0	0	0	0	0	0	0	0	0	0	0	0	0	0	0	0	0	0	0	0	0	0	0	0	0	0	0.344282	0	0	0
200	ASV200_Lachnospiraceae_Butyrivibrio	0	0	0	0	0	0	0	0	0	0	0	0.734993	0	0	0	0	0	0	0.422478	0	0	0	0	0	0	0	0	0	0	0	0	0	0	0	0	0.655976	0	0	0	0	0	0	0	0	0	0	0	0
201	ASV201_Prevotellaceae_Prevotella	0	0	0	0	0	0	0	0	0	0	0.306711	0	0	0	0	0	0	0.78908	0	0	0	0	0	0	0	0	0	0	0	0	0	0	0	0	0	0.61222	0	0	0.559683	0	0.584604	0	0	0	0	0	0	0
202	ASV202_Staphylococcus_equorum	0	0	0.506096	0	0	0	0	0	0	0	0	0	0	0	0	0	0	0	0	0	0	0	0	0	0	0	0	0	0	0	0	0	0	0	0	0	0	0	0	0	0	0	0	0	0	0	0	0
205	ASV205_Verrucomicrobiaceae_Akkermansia	0	0	0	0	0	0	0	0	0	0	0	0	0	0	0	0	0	0	0	0	0	0	0	0	0	0	0	0	0	0	0	0	0	0	0	0	0	0	0	0	0	0	0	0	0	0	0	0
208	ASV208_Micrococcaceae_Arthrobacter	0	0	0	0	0	0	0	0	0	0	0	0	0	0	0.347928	0	0	0	0.366675	0.592423	0	0	0	0	0	0	0.268706	0	0	0	0	0	0	0	0	0	0	0	0	0	0	0	0.347205	0.773139	0	0	0	0
210	ASV210_Alcaligenaceae_unclassified	0.346929	0	0	0	0	0	0	0	0	0	0	0	0	0	0	0	0	0	0	0.570542	0	0	0	0	0	0.613455	0	0	0	0.50428	0	0	0	0	0	0	0	0	0	0	0	0	0	0	0.280494	0	0	0
212	ASV212_Prevotellaceae_Prevotella	0	0.333156	0	0	0	0	0	0	0.322392	0	0	0	0	0	0	0	0	0	0	0.512939	0.559145	0	0	0	0	0	0	0	0	0	0	0	0.408016	0	0	0	0	0.473658	0	0	0	0.708752	0	0	0	0	0	0
213	ASV213_Methanobacteriaceae_Methanobrevibacter	0	0	0	0	0	0	0	0	0	0	0	0	0	0	0	0	0	0	0	0	0	0	0	0	0	0	0	0	0	0	0	0	0.509094	0	0	0	0	0	0	0	0	0	0	0	0	0	0	0
214	ASV214_Bacteroidaceae_5-7N15	0.369861	0	0	0	0	0	0	0	0	0	0.389342	0	0	0	0	0	0.656596	0	0	0	0	0	0	0	0	0	0	0	0	0	0	0	0.375393	0	0	0	0	0	0	0	0	0	0	0	0	0	0	0
215	ASV215_Phyllobacteriaceae_unclassified	0.633591	0	0	0.695954	0.749431	0.455872	0	0	0	0	0	0.665651	0	0	0	0	0	0	0	0	0.659572	0	0	0	0	0.566345	0	0.678458	0	0	0	0	0	0	0	0	0	0	0	0	0	0	0	0	0.342587	0	0	0
217	ASV217_Mycoplasmataceae_Mycoplasma	0	0	0	0	0	0	0	0	0	0	0	0	0	0	0.598759	0	0	0	0	0	0	0	0	0	0	0	0	0	0	0	0	0	0	0	0	0	0	0	0	0	0	0	0	0	0	0	0	0
218	ASV218_Porphyromonadaceae_unclassified	0	0	0	0.721	0	0	0	0	0	0	0	0.741269	0	0	0	0	0	0	0	0	0	0	0	0	0	0	0	0	0	0	0	0	0	0	0	0	0	0	0	0	0	0	0	0	0	0	0	0
220	ASV220_Prevotella_copri	0	0	0	0	0	0	0	0	0	0	0	0	0	0	0	0	0	0	0	0	0	0	0	0	0	0	0	0	0	0	0	0	0	0	0	0	0.663664	0	0	0	0	0	0	0	0.340853	0	0	0
221	ASV221_Cryomorphaceae_Fluviicola	0	0	0	0	0.660754	0	0	0	0	0	0	0	0	0	0	0	0	0.516964	0	0	0	0	0	0	0	0	0.39861	0	0	0	0	0	0	0	0	0	0	0	0	0	0	0	0	0	0	0	0	0.355697
222	ASV222_Phyllobacteriaceae_unclassified	0.431741	0	0	0	0	0.357268	0	0	0.410529	0	0.395142	0	0	0	0	0	0	0	0	0	0	0	0	0	0	0	0	0	0.618274	0	0	0	0.361103	0	0	0	0	0	0	0	0	0	0	0	0.297413	0	0	0.284043
224	ASV224_Alcaligenaceae_Oligella	0	0	0	0	0	0	0	0	0	0	0	0	0	0	0	0	0	0	0	0	0	0	0	0	0	0	0	0	0	0	0	0	0	0	0	0	0	0	0	0	0	0	0	0	0	0	0	0
225	ASV225_[Acidaminobacteraceae]_Guggenheimella	0	0	0	0.610821	0.655317	0	0	0	0.356237	0	0	0	0	0	0.371733	0	0	0	0	0	0	0.622889	0	0	0	0	0.342663	0	0	0	0	0	0	0	0	0	0	0	0	0	0	0	0	0	0	0	0	0.39809
228	ASV228_Lachnospiraceae_[Ruminococcus]	0	0	0	0	0	0	0	0	0	0	0	0	0	0	0	0	0	0	0	0	0	0	0	0	0	0	0	0	0	0	0	0	0	0	0	0	0	0	0	0	0	0	0	0	0	0	0	0
231	ASV231_Prevotella_copri	0	0	0	0	0	0	0	0	0	0	0	0	0	0	0	0	0	0	0	0	0	0	0	0	0	0	0	0	0	0	0	0	0.360427	0	0	0	0.574148	0	0	0	0	0	0	0	0	0	0	0
232	ASV232_Coriobacteriaceae_unclassified	0	0	0	0	0.652682	0	0	0	0	0	0	0	0	0	0	0	0	0	0	0	0	0	0	0	0	0	0	0	0	0	0	0	0	0	0	0	0	0	0	0	0	0	0	0	0	0	0	0
236	ASV236_Alteromonadaceae_Marinobacter	0	0	0	0	0	0	0	0	0	0	0	0	0	0	0	0	0	0	0	0	0	0	0	0	0	0	0	0	0	0	0	0	0	0	0	0	0.737865	0	0	0	0	0	0	0	0	0	0	0
237	ASV237_Bacteroidaceae_unclassified	0.385564	0	0	0	0.703845	0	0	0	0.297189	0	0	0	0	0	0.345569	0	0	0	0	0.493501	0	0	0	0	0	0	0	0	0	0	0	0	0	0	0	0	0	0	0	0	0	0	0	0	0	0	0	0
238	ASV238_Faecalibacterium_prausnitzii	0	0	0	0	0	0	0	0	0	0	0	0	0	0	0	0	0	0	0	0	0	0	0	0	0	0	0	0	0	0	0	0	0	0	0	0	0	0.644386	0	0	0	0	0	0	0	0	0	0
239	ASV239_Bifidobacteriaceae_Bifidobacterium	0	0	0	0	0	0	0	0	0	0	0	0	0	0	0	0	0	0.910776	0	0	0	0	0	0	0	0	0	0	0	0	0.665837	0	0	0	0	0	0	0	0	0	0	0	0	0	0	0	0	0
243	ASV243_Flavobacteriaceae_unclassified	0	0	0	0	0	0	0	0	0	0	0	0	0	0	0	0	0	0	0	0.531975	0	0	0	0	0	0	0	0	0	0	0	0	0	0	0	0	0	0	0	0	0	0	0	0	0	0	0	0
247	ASV247_Brevibacteriaceae_Brevibacterium	0	0	0.294368	0	0	0	0	0	0	0	0	0	0	0	0	0	0	0	0	0	0	0	0.67042	0	0	0	0	0	0	0	0	0	0	0	0	0	0	0	0	0	0	0	0	0	0	0	0.688529	0
248	ASV248_Porphyromonadaceae_unclassified	0	0	0	0	0	0	0	0	0	0	0	0	0	0	0	0	0	0	0	0	0	0	0	0	0	0	0	0	0	0	0	0	0	0	0	0	0	0	0	0	0	0	0	0	0	0	0	0.389114
249	ASV249_Succinivibrionaceae_Succinivibrio	0	0	0	0	0	0	0	0	0	0	0	0	0	0	0.341792	0	0	0	0	0	0	0	0	0	0	0	0.361915	0	0	0	0	0	0.399042	0	0	0	0	0	0	0	0	0	0	0	0.538945	0	0	0.377654
250	ASV250_Prevotellaceae_Prevotella	0.265655	0	0	0	0	0	0	0	0	0.650543	0	0	0	0	0	0	0	0	0.407108	0	0	0	0	0	0	0	0	0	0	0	0	0	0.321334	0	0	0	0	0	0	0	0	0	0	0	0	0	0	0
253	ASV253_Pirellulaceae_unclassified	0	0	0	0.665874	0	0	0	0	0	0	0	0.697208	0	0	0	0	0	0	0	0	0	0	0	0	0	0	0	0	0	0	0	0	0	0	0	0	0	0	0	0	0	0	0	0	0	0	0	0
254	ASV254_Corynebacteriaceae_Corynebacterium	0	0	0	0	0	0	0	0	0	0	0	0	0	0	0	0	0	0	0	0.529459	0	0	0	0	0	0	0	0	0	0	0	0	0.448306	0	0	0	0	0	0	0	0.733098	0	0	0	0	0	0	0
255	ASV255_Bacteroidales_unclassified	0	0	0	0	0	0	0	0	0	0	0	0	0	0	0	0	0	0	0	0	0	0	0	0	0	0	0	0	0	0	0	0	0	0	0	0	0	0	0	0	0	0.850115	0	0	0	0	0	0
256	ASV256_Jonesiaceae_Jonesia	0	0.474353	0	0	0	0	0	0	0	0	0	0	0	0	0	0	0	0	0	0	0	0	0	0	0	0	0	0	0	0	0	0	0	0	0	0	0	0	0	0	0	0	0	0	0	0	0	0
258	ASV258_Comamonadaceae_unclassified	0.443019	0	0	0	0	0	0	0	0	0	0	0.702601	0	0	0	0	0	0	0	0	0	0	0	0	0	0	0	0	0.639726	0	0	0	0.561287	0	0	0	0	0	0	0	0	0.944615	0	0	0	0.770718	0	0
259	ASV259_Staphylococcaceae_Jeotgalicoccus	0	0	0.454958	0	0.66702	0	0	0	0.321217	0	0	0.744685	0	0	0	0	0	0	0	0	0	0	0	0	0	0	0	0.569159	0	0	0	0	0	0	0	0	0	0.399111	0	0	0	0	0	0	0	0	0	0
262	ASV262_Spirochaetaceae_Treponema	0	0	0	0	0	0	0	0	0.38537	0	0	0	0	0	0	0	0	0	0	0	0	0	0	0	0	0	0	0	0	0	0	0	0	0	0	0	0	0	0	0	0	0.722255	0.336796	0	0	0	0	0.427811
266	ASV266_Ruminococcaceae_unclassified	0	0	0	0	0	0	0	0	0	0	0	0	0	0	0	0	0	0	0	0	0	0	0	0	0	0	0	0	0	0	0	0	0	0	0	0	0	0	0	0	0	0	0	0	0	0	0	0
268	ASV268_Peptostreptococcaceae_unclassified	0	0	0	0	0	0	0	0	0	0	0.395912	0	0	0	0	0	0	0	0	0	0	0	0	0	0	0	0	0	0	0	0	0	0	0	0	0	0	0	0	0	0	0	0	0	0	0	0	0
269	ASV269_Prevotellaceae_Prevotella	0	0	0.352888	0	0	0	0	0	0	0.520236	0	0	0	0	0	0	0	0	0	0	0	0	0	0	0	0	0.375109	0	0	0	0	0	0.410288	0	0	0	0	0	0	0	0	0	0	0	0	0	0	0
270	ASV270_[Paraprevotellaceae]_CF231	0	0	0	0	0	0	0	0	0	0	0.387669	0	0	0	0	0	0	0	0	0	0	0	0	0	0	0.709502	0	0	0	0	0	0	0.450834	0	0	0	0	0.629679	0	0	0	0	0	0	0	0	0	0
274	ASV274_Spirochaetaceae_Treponema	0	0	0	0	0	0	0	0	0	0	0	0	0	0	0	0	0	0	0	0	0	0	0	0	0	0	0	0	0	0	0	0	0	0	0	0	0.613318	0	0	0	0	0	0	0	0	0	0	0
277	ASV277_[Paraprevotellaceae]_[Prevotella]	0	0	0.331983	0	0	0	0	0	0	0	0	0	0	0	0.366719	0.35709	0	0	0.458144	0	0	0	0	0	0	0	0	0	0	0	0	0	0.535712	0	0	0	0	0	0	0	0	0	0	0	0	0	0	0
281	ASV281_Bacillales_unclassified	0	0	0	0	0	0	0	0	0	0	0	0	0	0.561251	0	0	0	0	0	0	0	0	0	0	0	0	0.601597	0	0	0	0	0	0	0	0	0	0	0	0	0	0	0	0	0	0	0	0	0
287	ASV287_Prevotellaceae_Prevotella	0	0	0	0	0	0	0	0	0	0	0	0	0	0	0	0.48965	0	0	0	0	0	0	0	0.72043	0	0	0	0	0	0	0	0	0.405184	0	0	0	0	0	0	0	0	0	0	0	0	0	0	0
290	ASV290_Staphylococcaceae_Jeotgalicoccus	0	0	0	0	0	0	0	0	0	0	0	0	0	0	0	0	0	0	0	0	0	0	0.758229	0	0	0	0	0	0	0	0	0	0	0	0	0	0.654073	0	0	0	0	0	0	0	0	0	0	0
291	ASV291_Porphyromonadaceae_unclassified	0	0	0	0	0	0	0	0	0	0	0	0	0	0	0	0	0	0	0	0	0	0	0	0	0	0	0	0	0	0	0	0	0	0	0	0	0	0	0.58222	0	0	0.612301	0	0	0	0	0	0
292	ASV292_Clostridiales_unclassified	0.422939	0	0	0	0	0	0.75193	0	0	0	0	0	0	0	0	0	0	0	0	0	0	0	0	0	0	0	0.439287	0	0	0	0	0	0	0	0	0	0	0	0	0	0	0	0	0	0	0	0	0
295	ASV295_Roseburia_faecis	0	0	0	0	0	0	0	0	0	0	0.627587	0	0	0	0	0	0	0	0	0	0	0	0	0	0	0	0	0	0	0.621907	0	0	0	0	0	0	0	0	0	0	0	0	0	0	0	0	0	0
296	ASV296_Micrococcaceae_unclassified	0	0	0	0	0	0	0	0	0	0	0	0	0	0	0	0	0	0	0	0	0	0	0	0	0	0	0	0	0	0	0	0	0	0	0	0	0	0	0	0	0	0	0	0	0	0	0	0
297	ASV297_Prevotellaceae_Prevotella	0	0	0	0	0	0	0	0	0	0	0	0	0	0	0	0	0	0	0	0	0	0	0	0	0	0	0	0	0	0	0	0	0	0	0	0	0	0.555132	0	0	0	0	0	0	0	0	0	0
298	ASV298_Verrucomicrobiaceae_unclassified	0	0	0	0	0	0	0.639674	0	0	0	0	0	0	0	0	0	0	0	0	0	0	0	0	0	0	0	0	0	0	0	0	0.643672	0	0	0	0	0	0	0	0	0	0	0	0	0	0	0	0
302	ASV302_Alteromonadaceae_Cellvibrio	0	0	0.40816	0	0	0	0	0	0	0	0.38694	0	0	0	0	0	0	0	0	1	0	0	0	0	0	0	0	0.709878	0	0	0	0	0	0	0	0	0	0	0	0	0	0	0.370218	0	0	0	0	0
305	ASV305_Verrucomicrobiaceae_Akkermansia	0	0	0	0	0	0	0	0	0	0	0	0	0	0	0	0	0	0	0	0	0	0	0	0	0	0	0	0	0	0.649027	0	0	0	0	0	0	0	0	0	0	0	0	0	0	0	0	0	0
311	ASV311_[Mogibacteriaceae]_Mogibacterium	0	0	0	0	0	0	0	0	0	0	0	0	0	0	0	0	0	0	0	0	0	0	0	0	0	0	0	0	0	0	0	0	0	0	0	0	0	0	0	0	0	0	0	0	0	0	0	0
312	ASV312_Clostridiales_unclassified	0.45378	0	0	0	0	0	0	0	0	0	0	0	0	0	0	0	0	0	0	0	0	0	0.702192	0	0	0	0	0	0	0	0	0	0	0	0	0	0	0	0	0	0	0	0.397817	0	0	0	0	0
321	ASV321_Corynebacteriaceae_Corynebacterium	0	0	0	0	0	0	0	0	0	0	0	0.697612	0	0	0	0	0	0	0	0	0	0	0	0	0	0	0	0	0	0	0	0	0	0	0	0	0	0	0	0	0	0	0	0	0	0	0	0
323	ASV323_Veillonellaceae_Phascolarctobacterium	0	0	0	0	0	0	0	0	0	0	0	0	0	0	0	0	0	0	0	0	0	0	0	0	0	0	0	0	0	0	0	0	0	0	0	0	0	0	0	0	0	0	0	0	0	0	0	0
324	ASV324_Intrasporangiaceae_Serinicoccus	0	0	0	0	0	0	0	0	0	0	0	0	0	0	0	0	0	0	0	0	0	0	0	0	0	0	0	0	0	0	0	0	0	0	0	0	0	0	0	0	0	0	0	0	0	0	0	0
325	ASV325_Pseudoclavibacter_bifida	0.334096	0	0.410744	0	0	0	0.614902	0	0	0	0	0	0	0	0	0	0	0	0	0	0.486415	0	0	0	0	0	0.357661	0	0	0	0	0	0	0	0	0	0	0	0	0	0	0	0.385123	0	0	0	0	0
326	ASV326_Clostridiales_unclassified	0	0	0	0	0	0	0	0	0	0	0	0	0	0	0.597766	0	0	0	0	0	0	0	0	0	0	0	0	0	0	0	0	0	0.66576	0	0	0	0	0	0	0	0	0	0	0	0	0	0	0.638568
327	ASV327_Fibrobacter_succinogenes	0	0	0	0	0	0	0	0	0	0	0	0	0	0	0	0	0	0	0	0	0	0	0	0	0	0	0	0	0	0	0	0	0	0	0	0	0	0	0	0	0	0	0	0	0	0	0	0.478301
330	ASV330_[Weeksellaceae]_Wautersiella	0	0	0	0	0	0	0	0	0.581675	0	0.338115	0	0	0	0	0	0	0	0	0	0	0	0	0	0	0	0.436922	0	0	0	0	0	0	0	0	0	0	0	0	0	0.704918	0	0	0	0	0	0	0
331	ASV331_JG30-KF-CM45_unclassified	0.532262	0	0	0	0	0	0	0	0	0	0	0	0	0	0	0.390382	0	0	0	0.653387	0	0	0	0	0	0	0	0	0	0	0	0	0	0	0	0	0	0	0	0	0	0	0	0	0	0	0	0
336	ASV336_Xanthomonadaceae_Stenotrophomonas	0	0	0	0	0	0	0	0	0	0	0.497698	0	0	0	0	0	0	0	0	0	0	0	0	0	0	0	0	0	0	0	0	0	0	0	0	0	0	0	0	0	0	0	0.446934	0	0	0	0	0
338	ASV338_[Weeksellaceae]_unclassified	0	0	0	0	0	0	0	0	0	0	0.416845	0	0	0	0.333192	0	0	0	0	0	0	0	0	0	0	0	0	0	0	0	0	0	0	0	0	0	0	0	0	0	0	0	0	0	0	0	0	0.4283
339	ASV339_Bacteroidaceae_5-7N15	0	0	0	0	0	0	0	0	0	0	0	0	0	0	0	0	0	0	0	0	0	0	0	0	0	0	0	0	0	0	0	0	0	0	0	0	0	0	0	0	0	0	0	0	0	0	0	0
343	ASV343_Bifidobacteriaceae_unclassified	0	0	0	0	0	0	0	0	0	0	0	0	0	0	0	0	0	0	0	0	0	0	0	0	0	0	0	0	0	0	0	0	0	0	0	0	0	0	0	0	0	0	0	0	0	0	0	0.516832
346	ASV346_Mycoplasmataceae_Mycoplasma	0	0	0	0	0	0	0	0	0	0	0	0	0	0	0	0	0	0	0	0	0	0	0	0	0	0	0	0	0	0	0	0	0	0	0	0	0	0	0	0	0	0	0	0	0	0	0	0
352	ASV352_Phyllobacteriaceae_Aminobacter	0.403284	0	0	0.672059	0.79468	0	0	0	0	0	0	0	0	0	0	0	0	0	0	0	0	0	0	0	0	0	0	0	0	0	0	0	0	0	0	0	0	0	0	0	0	0	0.406561	0	0	0	0	0
353	ASV353_Dietziaceae_Dietzia	0	0	0	0	0	0	0	0	0	0	0	0	0	0	0	0.407832	0	0	0	0	0	0	0	0	0	0	0	0	0	0	0	0	0.397752	0	0	0	0	0	0	0	0	0	0	0	0	0	0	0
354	ASV354_Moraxellaceae_Acinetobacter	0	0	0	0	0	0	0	0	0.624809	0	0.388488	0	0	0	0	0	0	0	0	0	0	0	0	0	0	0	0.473071	0	0	0	0	0	0	0	0	0	0	0	0	0	0	0	0	0	0	0	0	0
356	ASV356_Clostridiales_unclassified	0	0	0	0	0	0	0	0.818521	0	0	0	0	0.732557	0	0	0	0	0	0	0	0	0.629378	0	0	0	0	0	0	0	0	0	0	0	0	0	0	0	0	0	0	0	0	0	0	0	0	0	0
357	ASV357_Coriobacteriaceae_unclassified	0	0	0	0	0	0.449279	0	0	0	0	0.500735	0	0	0	0	0.477572	0	0	0	0	0	0	0	0	0	0	0	0	0	0	0	0	0	0	0	0	0	0.493791	0	0	0	0	0	0	0	0	0	0
358	ASV358_Clostridiaceae_Clostridium	0.395641	0	0.504559	0	0	0	0	0	0	0	0	0	0	0	0	0	0	0	0.447783	0	0	0	0	0	0	0	0.509016	0	0	0	0	0	0	0	0	0	0	0	0	0	0	0	0.482699	0	0	0	0	0
360	ASV360_Dermabacteraceae_Brachybacterium	0	0	0	0	0	0	0	0	0	0	0	0	0	0	0	0	0	0	0	0.592808	0	0	0	0	0	0	0	0	0	0	0	0	0	0	0	0	0	0	0	0	0	0	0	0	0	0	0	0
361	ASV361_Veillonellaceae_Anaerovibrio	0	0	0.369832	0	0	0	0	0	0	0	0	0	0.719426	0	0	0.490003	0	0	0	0	0	0	0.671921	0	0	0	0	0	0	0	0	0	0	0	0	0	0	0	0	0	0	0	0	0	0	0	0	0
362	ASV362_Chitinophagaceae_unclassified	0.439088	0	0	0	0	0	0	0	0	0	0	0	0	0	0	0	0	0	0	0	0	0	0	0	0	0	0	0	0	0	0	0	0	0	0	0	0	0	0	0	0	0	0	0	0	0	0	0
363	ASV363_Bacteroidaceae_Bacteroides	0	0	0	0	0	0	0	0	0.361729	0	0	0	0	0	0	0	0	0	0	0.602362	0	0	0	0	0	0	0	0	0	0	0	0	0	0	0	0	0	0	0	0	0	0	0	0	0	0	0	0
365	ASV365_Nocardioidaceae_unclassified	0	0	0	0	0	0	0	0	0	0	0	0	0	0	0	0	0	0	0	0	0.785254	0	0	0	0	0	0	0	0	0	0	0	0	0	0	0	0	0	0	0	0	0	0	0	0	0	0	0.407437
368	ASV368_Corynebacteriaceae_Corynebacterium	0.581962	0	0	0	0	0	0	0	0	0	0	0	0	0	0	0	0	0	0	0	0	0	0	0	0	0	0	0	0	0	0	0	0	0	0	0	0	0	0	0	0	0	0	0	0	0	0	0
372	ASV372_Proteocatella_sphenisci	0	0	0	0	0	0	0	0	0	0	0	0	0	0	0	0	0	0	0	0	0	0	0	0	0.658776	0	0	0	0	0	0	0	0	0	0	0	0	0	0	0	0	0	0	0	0	0	0	0.366387
373	ASV373_Sphingobacteriaceae_unclassified	0.331278	0	0	0	0	0	0	0	0.347506	0	0.385278	0	0	0	0	0	0.569794	0	0	0	0	0	0	0	0	0.54448	0	0	0.622899	0	0.559844	0	0	0	0	0	0	0	0	0	0	0	0	0.702014	0	0	0	0.383156
374	ASV374_Rhizobiaceae_Agrobacterium	0	0	0	0	0	0	0	0	0	0	0	0	0	0	0	0	0	0	0	0	0	0	0	0	0	0	0	0	0	0.523338	0	0	0	0	0	0	0	0	0	0	0	0	0	0	0	0	0	0
375	ASV375_[Chromatiaceae]_Alishewanella	0	0	0	0	0	0	0	0	0	0	0	0	0	0	0	0	0	0	0	0	0	0	0	0	0	0	0	0	0	0	0	0	0	0	0	0	0	0	0	0	0	0	0	0	0	0	0	0
376	ASV376_Mycoplasmataceae_Mycoplasma	0	0	0	0	0	0	0	0	0	0	0	0	0	0	0	0	0	0	0	0	0	0	0	0	0	0	0	0	0	0	0	0	0	0	0	0	0	0	0	0	0	0	0	0	0	0	0	0
377	ASV377_Methanobacteriaceae_Methanobrevibacter	0	0	0	0	0	0	0	0	0	0	0	0	0	0	0	0.636377	0	0	0	0	0	0	0	0	0	0	0	0	0	0	0	0	0	0	0	0	0	0	0	0	0	0	0	0	0	0	0	0
380	ASV380_[Weeksellaceae]_unclassified	0	0	0.509247	0	0	0	0	0	0	0	0	0	0	0	0	0	0	0	0	0	0	0	0	0	0	0	0.641858	0	0	0	0	0	0	0	0	0	0	0	0	0	0	0	0	0	0	0.588863	0	0
381	ASV381_Leuconostocaceae_Weissella	0	0	0	0	0	0	0	0	0.424459	0	0	0	0	0	0	0	0	0	0	0	0	0	0	0	0	0	0	0	0	0	0	0	0	0	0	0	0	0	0	0	0	0	0	0	0.300539	0	0	0
387	ASV387_Flavobacteriaceae_unclassified	0	0	0	0	0	0	0	0	0	0	0	0	0	0	0	0	0	0	0	0	0	0	0	0	0	0	0	0	0	0	0	0	0	0	0	0	0	0	0	0	0	0	0	0	0	0	0	0.422992
388	ASV388_Lachnospiraceae_Butyrivibrio	0	0	0	0	0	0	0	0	0.377638	0	0	0	0.675715	0	0	0	0	0	0	0	0	0	0	0	0	0	0	0	0	0	0	0	0	0	0	0	0	0	0	0	0	0	0	0	0	0	0	0
389	ASV389_[Tissierellaceae]_Gallicola	0	0	0	0	0	0	0	0	0	0	0	0	0	0	0	0	0	0	0	0	0	0	0	0	0	0	0	0	0	0	0	0	0.353138	0	0	0	0	0	0	0	0	0	0	0	0	0	0	0
390	ASV390_Chitinophagaceae_unclassified	0	0.551006	0	0	0	0	0	0	0	0	0.433346	0	0	0	0.439303	0	0	0	0	0	0	0	0	0	0	0	0	0	0	0	0	0	0	0	0	0	0	0	0	0	0	0	0.559725	0	0	0	0	0
394	ASV394_Lachnospiraceae_Blautia	0	0	0	0	0	0	0	0	0	0	0	0	0	0	0	0	0	0	0	0	0.889579	0	0	0	0.608256	0	0	0	0	0	0	0	0	0	0	0	0	0	0	0	0	0	0	0	0	0	0	0.422387
399	ASV399_Corynebacteriaceae_Corynebacterium	0	0	0	0	0	0	0	0	0	0	0	0	0	0	0	0	0	0	0	0	0	0	0	0	0	0	0	0	0	0	0	0	0	0	0	0	0	0	0	0	0	0	0.558833	0	0	0	0	0
400	ASV400_GMD14H09_unclassified	0	0	0	0	0	0	0	0	0	0	0	0	0	0	0.455774	0	0.935681	0	0	0	0.529439	0	0	0.708331	0	0	0	0	0	0	0	0	0	0	0	0	0	0	0	0	0	0	0	0	0	0	0	0
401	ASV401_Brucellaceae_Ochrobactrum	0	0	0	0	0	0	0	0	0	0	0	0	0	0	0	0	0	0	0	0	0	0	0	0	0	0	0	0	0	0.65285	0	0	0	0	0	0	0	0	0	0	0	0	0	0	0	0	0	0
403	ASV403_[Tissierellaceae]_Tissierella_Soehngenia	0.523033	0	0	0	0	0	0	0	0	0	0	0	0	0	0	0	0	0	0	0	0.568474	0	0	0	0	0	0	0	0	0	0	0	0	0	0	0	0	0	0.703031	0	0	0	0	0	0	0	0	0
404	ASV404_Desulfovibrionaceae_Desulfovibrio	0	0	0	0	0	0	0	0.534176	0	0	0	0	0	0	0	0	0	0	0	0	0	0	0	0	0	0	0	0	0	0	0	0	0	0	0	0	0	0	0	0	0	0	0	0	0	0	0	0.475474
407	ASV407_[Paraprevotellaceae]_YRC22	0	0	0	0	0	0	0	0	0	0	0	0	0	0	0	0	0	0	0	0	0	0	0	0	0	0	0	0	0	0	0	0	0	0	0	0	0	0	0	0	0	0	0	0	0	0	0	0
409	ASV409_Clostridiaceae_Proteiniclasticum	0	0	0	0	0	0.37171	0	0	0	0	0	0	0	0	0	0	0	0	0	0	0	0.589352	0	0	0	0	0	0	0	0	0	0	0	0	0	0	0	0.435289	0	0	0	0	0	0	0	0	0	0
413	ASV413_Clostridiales_unclassified	0	0	0	0	0	0	0	0	0	0	0	0	0	0	0	0	0	0	0.527619	0	0	0	0	0	0	0	0	0	0	0	0	0	0	0	0	0	0	0	0	0	0	0	0	0	0	0	0	0
415	ASV415_Intrasporangiaceae_unclassified	0	0	0	0	0	0	0	0	0	0	0	0	0	0	0	0	0	0	0	0	0	0	0	0	0	0	0	0	0	0.645875	0	0	0	0	0	0	0	0	0	0	0	0	0.504281	0	0	0	0	0
417	ASV417_[Acidaminobacteraceae]_Guggenheimella	0	0	0	0	0	0	0	0	0	0	0	0	0	0	0.509713	0	0	0	0	0	0	0	0	0	0	0	0	0	0	0	0	0	0	0	0	0	0	0	0	0	0	0	0	0	0	0	0	0
421	ASV421_Clostridium_butyricum	0	0	0	0	0	0	0	0	0	0	0	0	0	0	0	0	0	0	0	0	0	0	0	0	0	0	0	0	0	0	0	0	0	0	0	0	0	0	0	0	0	0	0	0	0	0	0	0
422	ASV422_Sphingobacteriaceae_unclassified	0	0	0	0	0	0	0	0	0	0	0	0	0	0	0	0	0	0	0	0	0	0	0	0	0	0.626199	0	0	0	0	0	0	0	0	0	0	0	0	0	0	0	0	0.663344	0.666491	0	0	0	0
424	ASV424_RF16_unclassified	0	0	0	0	0	0	0	0	0	0.825996	0	0	0	0	0	0.526857	0.996085	0	0	0	0	0	0	0	0	0	0	0	0	0	0	0.996084	0	0	0	0	0	0	0	0	0	0	0	0	0	0	0	0
427	ASV427_Porphyromonadaceae_Paludibacter	0	0	0	0	0	0	0	0	0	0	0	0	0	0	0	0	0	0	0	0	0.689312	0	0	0	0	0	0.444558	0	0.785379	0	0	0	0	0.681673	0	0	0	0	0	0	0	0	0.379174	0	0	0	0	0
430	ASV430_Sphingobacteriaceae_unclassified	0	0	0	0	0	0	0	0	0	0	0	0	0	0	0	0	0	0	0	0	0	0	0	0	0	0	0	0	0	0	0	0	0	0	0	0	0	0	0	0	0	0	0	0	0	0	0	0.392502
435	ASV435_Planococcaceae_unclassified	0.493432	0	0	0	0	0	0	0	0	0	0	0	0	0	0	0	0	0	0	0	0	0	0	0	0	0	0	0	0	0	0	0	0.424171	0	0	0	0	0	0	0	0	0	0	0	0	0	0	0
436	ASV436_Bacteroidaceae_5-7N15	0	0	0	0	0	0	0	0	0	0	0	0	0	0	0	0	0	0	0	0	0	0	0	0	0	0	0	0	0	0	0	0	0	0	0	0	0	0	0	0	0	0	0	0	0	0	0	0
440	ASV440_Bacteroidales_unclassified	0	0	0	0	0	0	0	0	0	0	0	0	0	0	0	0	0	0	0	0	0	0	0	0	0	0	0	0	0	0	0.978156	0	0	0	0	0	0	0	0	0	0	0	0	0	0	0	0	0.559465
441	ASV441_Lachnospiraceae_unclassified	0	0	0	0	0	0	0	0	0	0	0	0	0	0	0	0	0	0	0	0.689127	0	0	0	0	0	0	0	0	0	0.438822	0	0	0	0	0	0	0	0	0	0	0	0	0	0	0	0	0	0
444	ASV444_Mycoplasmataceae_Mycoplasma	0	0	0	0	0	0	0	0	0	0	0	0	0	0	0	0.613597	0	0	0.542866	0	0	0	0	0	0	0	0	0	0	0	0	0	0	0	0	0	0	0	0	0	0	0	0	0	0	0	0	0
451	ASV451_Ruminococcaceae_unclassified	0	0	0	0	0	0	0	0	0.593772	0	0.550532	0	0	0	0	0	0	0	0	0	0	0	0	0	0	0	0	0	0	0	0	0	0	0	0	0	0	0	0	0	0	0	0	0	0	0	0	0.676299
453	ASV453_Hyphomicrobiaceae_Devosia	0	0	0	0	0	0	0	0	0	0	0.388247	0	0	0	0	0	0	0	0	0	0	0	0	0	0	0	0	0	0	0	0	0	0	0	0	0	0	0.4267	0	0	0	0	0	0	0	0	0	0
454	ASV454_Pseudomonadaceae_unclassified	0	0	0	0	0	0	0	0	0	0	0	0	0	0	0	0	0	0	0	0	0	0	0	0	0	0	0	0	0	0	0	0	0	0	0	0	0	0	0	0	0	0	0	0	0	0	0	0.411273
455	ASV455_Clostridiaceae_Clostridium	0	0	0	0	0	0	0	0	0	0.544697	0	0	0	0	0	0	0	0	0	0	0	0	0	0	0	0	0	0	0	0	0	0	0	0	0	0	0	0.731704	0	0	0	0	0	0	0	0	0	0
456	ASV456_Sphingobacteriaceae_Sphingobacterium	0	0.537122	0	0	0	0	0	0	0	0	0	0	0	0	0	0	0	0	0	0	0	0	0	0	0	0	0	0	0	0	0	0	0	0.654498	0	0	0	0	0	0	0	0	0	0	0	0	0	0
457	ASV457_[Tissierellaceae]_unclassified	0	0	0	0	0	0	0	0	0	0	0	0.610182	0	0	0.39757	0	0	0	0	0	0	0	0	0	0	0	0	0	0	0	0	0.805155	0	0	0	0	0	0	0	0	0	0	0.42398	0	0	0	0	0
459	ASV459_Clostridiaceae_SMB53	0	0	0	0	0	0	0	0	0	0	0	0	0	0	0	0	0	0	0	0	0	0	0	0	0	0	0	0	0	0	0	0	0	0	0	0	0	0	0	0	0	0	0	0	0	0	0	0
461	ASV461_Alcaligenes_faecalis	0	0	0	0	0	0	0	0	0	0	0	0	0	0	0	0	0	0	0.504164	0	0	0	0	0	0	0	0	0	0	0	0	0	0	0	0	0	0	0	0	0	0	0	0	0	0	0	0	0
462	ASV462_Planococcaceae_unclassified	0	0	0	0	0	0	0	0	0	0	0	0	0	0	0	0	0	0	0	0	0	0	0	0	0	0	0	0	0	0	0	0	0	0	0	0	0	0	0	0	0	0.76723	0	0	0	0.691448	0	0
464	ASV464_Saprospiraceae_unclassified	0	0	0	0	0	0	0	0	0	0	0	0	0	0	0	0	0	0	0	0	0	0	0	0	0	0	0	0	0	0	0	0	0	0	0	0	0	0	0	0	0	0	0	0	0	0	0	0
469	ASV469_Bacteroidaceae_BF311	0	0	0	0	0	0	0	0	0.523508	0	0	0	0	0	0	0	0	0	0	0	0	0	0	0	0	0	0	0	0	0.628796	0	0	0	0	0	0	0	0	0	0	0	0	0	0	0	0	0	0
474	ASV474_[Tissierellaceae]_GW-34	0	0	0	0	0	0	0	0	0	0	0	0	0	0	0	0	0	0	0	0	0	0	0	0	0	0	0	0	0	0	0	0	0	0	0	0	0	0	0	0	0	0	0	0	0.385624	0	0	0
476	ASV476_JG30-KF-CM45_unclassified	0	0	0	0	0	0	0	0	0	0	0	0	0	0	0	0	0	0	0	0	0	0	0	0	0	0	0	0	0	0	0	0	0	0	0	0	0	0	0	0	0	0	0	0	0	0	0	0
477	ASV477_Synergistaceae_vadinCA02	0	0	0	0	0	0	0	0	0	0	0	0	0	0	0	0	0	0.765095	0	0	0	0	0	0	0	0	0	0	0	0	0	0	0	0	0	0	0	0.692937	0	0	0	0	0	0	0	0	0	0.377857
480	ASV480_Methanobacteriaceae_Methanobrevibacter	0	0.536599	0	0	0	0	0	0	0	0	0	0	0	0	0	0	0	0	0	0	0	0	0	0	0	0	0	0	0	0	0	0	0	0	0	0	0	0	0	0	0	0	0.544134	0	0	0	0	0
481	ASV481_Sphingobacteriaceae_Sphingobacterium	0	0	0	0	0	0	0	0	0	0	0	0	0	0	0	0	0	0	0	0	0	0	0	0	0	0	0	0	0	0	0	0	0	0	0	0	0	0	0	0	0	0	0	0	0	0	0	0
483	ASV483_[Acidaminobacteraceae]_Guggenheimella	0.439623	0	0	0	0	0	0.791442	0	0	0	0	0	0	0	0	0	0	0	0	0	0	0	0	0	0.656742	0	0	0.675474	0	0	0	0	0	0	0	0	0	0	0	0	0	0	0	0	0	0	0	0
486	ASV486_Hyphomicrobiaceae_Devosia	0	0	0	0	0	0	0	0	0	0	0	0	0	0	0	0	0	0	0	0	0	0	0	0	0	0	0	0	0	0	0	0	0	0	0	0	0	0	0	0.635168	0	0	0	0	0	0	0	0
490	ASV490_Marinilabiaceae_unclassified	0	0	0	0	0	0	0	0	0	0	0	0	0	0	0	0	0	0	0	0	0	0	0	0	0	0	0	0	0	0	0	0	0	0	0	0	0	0	0	0	0	0	0	0	0	0	0	0
491	ASV491_Planococcaceae_Rummeliibacillus	0	0.593946	0	0	0	0	0	0	0.674243	0	0	0	0	0	0	0	0	0	0	0	0	0	0	0	0	0	0	0	0	0	0	0	0.56907	0	0	0	0	0	0	0	0	0	0	0	0	0	0	0
496	ASV496_Mycoplasmataceae_Mycoplasma	0	0	0	0	0	0	0	0	0	0	0	0	0	0	0	0	0	0	0	0	0	0	0	0	0	0	0	0	0	0	0	0	0	0	0	0	0	0	0	0	0	0	0	0	0	0	0	0
498	ASV498_[Acidaminobacteraceae]_Guggenheimella	0	0	0	0	0	0	0	0	0	0	0	0	0	0	0	0	0	0	0	0	0	0	0	0	0	0	0	0	0	0	0	0	0	0	0	0	0	0	0	0	0	0	0	0	0	0	0	0
504	ASV504_Alteromonadales_unclassified	0	0	0	0	0	0	0	0	0	0	0	0	0	0	0	0	0	0	0	0	0	0	0	0	0	0	0	0	0	0	0.86319	0	0	0	0	0	0	0	0	0	0	0	0	0	0	0	0	0
506	ASV506_Intrasporangiaceae_unclassified	0	0	0	0	0	0	0	0	0	0	0	0	0	0	0	0	0	0	0	0	0	0	0	0	0	0	0	0	0	0	0	0	0	0	0	0	0	0	0	0	0	0	0	0	0	0	0	0
508	ASV508_Rhodocyclaceae_Thauera	0	0	0	0	0	0	0	0	0	0	0	0	0	0	0	0	0	0	0	0	0	0	0	0	0	0	0	0	0	0	0	0	0	0	0	0	0	0	0	0	0	0	0	0	0	0	0	0
511	ASV511_Xanthomonadaceae_Stenotrophomonas	0.53603	0	0	0	0	0	0	0	0.421354	0	0	0	0	0	0	0	0	0	0	0	0	0	0	0	0	0	0	0	0	0	0	0	0	0	0	0	0	0	0	0	0	0	0	0	0	0	0	0
513	ASV513_Prevotellaceae_Prevotella	0	0	0	0	0	0	0	0	0.555852	0	0	0	0	0	0	0	0	0	0	0	0	0	0	0	0	0	0	0	0	0	0	0	0	0	0	0	0	0	0	0	0	0	0.443125	0	0	0	0	0
515	ASV515_Ruminococcus_bromii	0	0	0	0	0	0	0	0	0	0	0	0	0	0	0	0	0	0	0	0	0	0	0	0	0	0	0	0	0	0	0	0	0	0	0	0	0	0	0	0	0	0	0	0	0	0	0	0
518	ASV518_Corynebacteriaceae_Corynebacterium	0	0	0	0	0	0	0	0	0	0	0	0	0	0	0.540409	0	0	0	0	0	0	0	0	0	0	0	0	0	0	0	0	0	0	0	0	0	0	0	0	0	0	0	0	0	0	0	0	0
523	ASV523_Dethiosulfovibrionaceae_HA73	0	0	0	0	0	0	0	0	0	0	0	0	0	0	0	0	0	0	0	0	0	0	0	0	0	0	0	0	0	0	0	0	0	0	0	0	0	0	0	0	0	0	0	0	0	0	0	0
524	ASV524_Brevundimonas_diminuta	0	0	0	0	0	0	0	0	0	0	0.439928	0	0	0	0	0	0	0	0	0	0	0	0	0	0	0	0	0.671665	0	0	0	0	0	0	0	0	0.634573	0	0	0	0	0	0	0	0	0	0	0
525	ASV525_Synergistaceae_vadinCA02	0	0	0	0	0	0	0	0	0	0	0	0	0	0	0	0	0	0	0	0	0	0	0	0	0	0	0	0	0	0	0	0	0	0	0	0	0	0	0	0	0	0	0	0	0	0	0	0
528	ASV528_Succinivibrionaceae_Succinivibrio	0.436395	0	0	0	0	0	0	0	0	0	0	0	0	0	0	0	0	0	0	0	0	0	0	0	0	0	0	0	0	0	0	0	0	0	0	0	0	0.643	0	0	0	0	0	0	0	0	0	0
530	ASV530_Aerococcaceae_unclassified	0	0	0	0	0	0	0	0	0	0	0	0	0	0	0.563259	0	0	0	0	0	0	0	0	0	0	0	0.530947	0	0	0	0	0	0	0.593009	0	0	0	0	0	0	0	0	0	0	0	0	0	0
535	ASV535_Nocardioidaceae_unclassified	0	0	0	0	0	0	0	0	0	0	0	0	0	0.83549	0	0	0	0	0	0	0	0	0	0	0	0	0	0	0	0	0	0	0	0	0	0	0	0	0	0	0	0	0	0	0	0	0	0
538	ASV538_Ruminococcaceae_unclassified	0	0	0	0	0	0	0	0	0	0	0	0	0	0	0	0	0	0	0	0	0	0	0	0	0	0	0	0	0	0	0	0	0	0	0	0	0	0.519002	0	0	0	0	0	0	0	0	0	0
539	ASV539_Cytophagaceae_unclassified	0	0	0	0	0	0	0	0	0	0	0	0	0	0	0	0	0	0	0	0	0	0	0	0	0	0	0	0	0	0	0.796978	0	0	0	0	0	0	0	0	0	0	0	0	0	0	0	0	0
540	ASV540_Microbacteriaceae_Leucobacter	0	0	0	0	0	0	0.683935	0	0	0.760409	0	0	0	0	0	0	0	0	0	0	0	0	0	0.684633	0	0	0	0	0	0	0	0	0	0	0	0	0	0	0	0	0	0	0	0	0	0	0	0
541	ASV541_Cyclobacteriaceae_unclassified	0	0	0	0	0	0	0	0	0	0	0.418446	0	0	0	0	0	0	0	0	0	0	0	0	0	0	0	0	0	0	0	0	0	0	0	0	0	0	0	0	0	0	0	0	0	0	0	0	0
543	ASV543_Verrucomicrobiaceae_unclassified	0	0	0	0	0	0	0	0	0.595074	0	0	0	0	0	0	0	0	0	0	0	0	0	0	0	0	0	0	0	0	0	0	0	0	0	0	0	0	0	0	0	0	0	0	0	0.543188	0	0	0
545	ASV545_Aerococcaceae_Aerococcus	0	0	0	0	0	0	0	0	0	0	0	0	0	0	0	0	0	0	0.504657	0.61001	0	0	0	0	0	0	0	0	0	0	0	0	0	0	0	0	0	0	0	0	0	0	0	0.558383	0	0	0	0
552	ASV552_Jonesiaceae_unclassified	0	0	0	0	0	0	0	0	0	0	0	0	0	0	0	0	0	0	0	0	0	0	0	0	0	0	0	0	0	0	0	0	0	0	0	0	0	0	0	0	0	0	0	0	0	0	0	0
557	ASV557_Jonesiaceae_unclassified	0	0	0	0	0	0.467271	0	0	0	0	0	0	0	0	0	0	0	0	0	0	0	0	0	0	0	0	0	0	0	0	0	0	0	0	0	0	0	0	0	0	0	0	0	0	0	0	0	0
560	ASV560_Acidimicrobiales_unclassified	0	0	0	0	0	0	0	0	0	0	0.60339	0	0	0	0	0	0	0	0	0	0	0	0	0	0	0	0	0	0	0	0	0	0	0	0	0	0	0	0	0	0	0	0.571719	0	0	0	0	0
562	ASV562_[Paraprevotellaceae]_CF231	0	0	0	0	0	0	0	0	0	0	0	0	0	0	0	0	0.689119	0	0	0	0	0	0	0	0	0	0	0	0	0	0	0	0	0	0	0	0	0.51432	0	0	0	0	0.484601	0	0	0	0	0
563	ASV563_GMD14H09_unclassified	0	0	0	0	0	0.395665	0	0.754165	0	0	0	0	0	0	0	0	0	0	0.648889	0	0	0	0	0	0	0	0	0	0	0	0	0	0	0	0	0	0	0	0	0	0	0.74892	0	0	0	0	0	0
568	ASV568_[Paraprevotellaceae]_[Prevotella]	0.431287	0	0	0	0	0	0	0	0	0	0	0	0	0	0.385139	0	0	0	0	0	0	0	0	0	0	0	0	0	0	0	0	0	0	0	0	0	0	0	0.80205	0	0	0	0	0	0.433472	0	0	0
569	ASV569_JG30-KF-CM45_unclassified	0	0	0	0	0	0	0	0	0	0	0	0	0	0	0	0	0	0	0	0	0	0	0	0	0	0	0	0	0	0	0	0	0	0	0	0	0	0	0	0	0	0	0	0	0	0	0	0
577	ASV577_Pseudomonadaceae_unclassified	0	0	0.476759	0	0	0	0	0	0.882281	0	0	0	0	0	0	0	0	0	0	0	0	0	0	0	0	0	0	0	0	0	0	0	0	0	0	0	0	0	0	0	0	0	0	0	0	0	0	0
579	ASV579_Sphingobacteriaceae_Sphingobacterium	0	0	0	0	0	0	0	0	0	0	0	0	0	0	0.448749	0	0	0	0	0	0	0	0	0	0	0	0	0	0	0	0	0	0	0	0	0	0	0	0	0	0	0	0	0	0	0	0	0
582	ASV582_Sanguibacteraceae_unclassified	0	0	0	0	0	0	0	0	0	0	0	0	0	0	0	0	0	0	0.481185	0	0	0	0	0	0	0	0	0	0	0	0	0	0	0	0	0	0	0	0	0	0	0	0	0	0	0	0	0
587	ASV587_Cyclobacteriaceae_unclassified	0	0	0	0	0	0	0	0	0	0	0	0	0	0	0	0	0	0	0	0	0	0	0	0	0	0	0	0	0	0	0	0	0	0	0	0	0	0	0	0	0	0	0	0	0.445789	0	0	0
589	ASV589_Lachnospiraceae_Dorea	0	0	0.643339	0	0	0	0	0	0	0	0	0	0	0	0	0	0	0	0	0	0	0	0	0	0	0	0	0	0	0	0	0	0	0	0	0	0	0	0	0	0	0	0	0	0	0	0	0
590	ASV590_Pusillimonas_noertemannii	0	0	0	0	0	0	0	0	0	0	0	0	0	0	0	0	0	0	0	0	0.663263	0	0	0	0	0	0	0	0	0	0	0	0	0	0	0	0	0	0	0	0	0	0	0	0	0	0	0
591	ASV591_p-2534-18B5_unclassified	0	0	0	0	0	0	0	0	0	0	0	0	0	0	0	0	0	0	0	0	0	0	0	0	0	0	0	0.73582	0	0	0	0	0	0	0	0	0	0.687002	0	0	0	0	0	0	0	0	0	0.45099
593	ASV593_Comamonadaceae_Hydrogenophaga	0	0	0	0	0	0	0	0	0	0	0	0.674953	0	0	0	0	0	0	0	0.876162	0	0	0	0	0	0	0	0	0	0	0	0	0	0	0	0	0	0	0	0	0	0	0	0	0	0	0	0
596	ASV596_Ruminococcaceae_unclassified	0	0	0	0	0	0	0	0	0	0	0	0	0	0	0	0	0	0	0	0	0	0	0	0	0	0	0	0	0	0	0	0	0	0	0	0	0	0	0	0	0	0	0	0	0	0	0	0
597	ASV597_Bacillaceae_unclassified	0	0	0	0	0	0	0	0	0	0	0	0	0	0	0	0	0	0	0	0	0	0	0	0	0	0	0	0	0	0	0	0	0	0	0	0	0	0	0	0	0	0	0	0	0	0	0	0.366612
600	ASV600_p-2534-18B5_unclassified	0	0.666427	0	0	0	0	0	0	0	0	0	0	0	0	0	0	0	0	0	0	0	0	0	0	0	0	0	0	0	0	0	0	0	0	0	0	0	0	0	0	0	0	0.727443	0	0	0	0	0
602	ASV602_Prevotellaceae_Prevotella	0	0	0	0	0	0	0	0	0	0	0	0	0	0	0	0	0	0	0	0.859883	0	0	0	0	0	0	0	0	0	0	0	0	0	0	0	0	0	0	0	0	0	0	0	0	0	0	0	0
603	ASV603_[Mogibacteriaceae]_Mogibacterium	0	0	0	0	0	0	0	0	0	0.671483	0	0	0	0	0	0	0	0	0	0	0	0	0	0	0	0	0	0	0	0	0	0	0	0	0	0	0	0	0	0	0	0	0	0	0	0	0	0
606	ASV606_[Tissierellaceae]_GW-34	0	0	0	0	0	0	0	0	0	0	0	0	0	0	0	0	0	0	0	0	0	0	0	0	0	0	0	0	0	0	0	0	0.415683	0	0	0	0	0	0	0	0	0.616572	0	0	0	0	0	0
610	ASV610_Methanobacteriaceae_Methanobrevibacter	0	0	0	0	0	0	0	0	0	0	0	0	0	0	0	0	0.506322	0	0	0	0	0	0	0	0	0	0	0	0	0	0.552599	0	0	0	0	0	0	0	0	0	0	0	0	0	0	0	0	0
613	ASV613_Prevotellaceae_Prevotella	0	0	0	0	0	0	0	0	0	0	0	0	0	0	0	0	0	0	0	0	0	0	0	0	0	0	0.656467	0	0	0	0	0	0	0	0	0	0	0	0	0	0	0	0	0	0	0	0	0
614	ASV614_Clostridiaceae_unclassified	0	0.661229	0	0	0	0	0	0	0.597344	0	0	0	0	0	0	0	0	0	0	0	0	0	0	0	0	0	0	0	0	0	0	0	0	0	0	0	0	0	0	0	0	0	0	0	0	0	0	0
617	ASV617_Clostridiaceae_Clostridium	0.560573	0	0	0	0	0	0	0	0	0	0	0	0	0	0	0	0	0	0	0	0	0	0	0	0	0	0	0	0	0	0	0	0	0	0	0	0	0	0	0	0.839577	0	0	0	0	0	0	0
618	ASV618_Trueperaceae_B-42	0	0	0	0	0	0	0	0	0	0	0.41004	0	0	0	0	0	0	0	0	0	0	0	0	0	0	0	0	0	0	0	0	0	0	0	0	0	0	0	0	0	0	0	0	0	0.431497	0	0	0
621	ASV621_Methanobacteriaceae_Methanosphaera	0	0	0	0	0	0	0	0	0	0	0	0	0	0	0	0	0	0	0	0	0	0	0	0	0	0	0	0	0	0	0	0	0	0	0	0	0	0	0	0	0	0	0	0	0	0	0	0
622	ASV622_Lachnospiraceae_Coprococcus	0	0	0	0	0	0	0	0	0	0	0	0	0	0	0	0	0	0	0	0	0.653884	0	0	0	0	0	0	0	0	0	0	0	0.381831	0	0	0	0	0	0	0	0.997618	0	0	0	0	0	0	0
623	ASV623_Verrucomicrobiaceae_unclassified	0	0	0	0	0	0	0	0	0	0	0	0	0	0	0	0	0	0	0	0	0	0	0	0	0	0	0	0	0	0	0	0	0	0	0	0	0	0.593274	0	0	0	0	0.502837	0	0	0	0	0
625	ASV625_[Weeksellaceae]_unclassified	0	0	0	0	0	0	0	0	0	0	0	0	0	0	0	0	0	0	0.720981	0	0	0	0	0	0	0	0	0	0	0	0	0	0	0	0	0	0	0	0	0	0	0	0	0	0	0	0	0
626	ASV626_Flavobacteriales_unclassified	0.484603	0	0	0	0	0	0	0	0	0	0	0	0	0	0	0	0	0	0	0	0	0	0	0	0	0	0	0	0	0	0	0	0	0	0	0	0	0	0	0	0	0	0	0	0	0	0	0
629	ASV629_Prevotellaceae_Prevotella	0	0	0	0	0	0	0	0	0	0	0.525196	0	0	0	0	0	0	0	0	0	0	0	0	0	0	0	0	0	0	0	0	0	0.396954	0	0	0	0	0	0	0	0	0	0	0	0	0	0	0
630	ASV630_Bacteroidales_unclassified	0	0	0	0	0	0	0	0	0	0	0	0	0	0	0	0	0	0	0	0	0	0	0	0	0	0	0	0	0	0	0	0	0.453825	0	0	0	0	0	0	0	0	0	0	0	0	0	0	0
632	ASV632_Actinomycetaceae_Trueperella	0	0	0	0	0	0	0	0	0	0	0	0	0	0	0	0	0	0	0	0	0	0	0	0	0	0	0.488646	0	0	0	0	0	0	0	0	0	0	0	0	0	0	0	0	0	0	0	0	0
634	ASV634_Sphingomonadaceae_Novosphingobium	0	0	0	0	0	0	0	0	0	0	0.394209	0	0	0	0.359299	0	0	0	0	0	0	0	0	0	0	0	0	0	0	0	0	0	0	0.622805	0	0	0	0	0	0	0	0	0.43927	0	0	0	0	0
636	ASV636_Rhodobacteraceae_Anaerospora	0	0	0	0	0	0	0	0	0	0	0	0	0	0	0	0	0	0	0	0	0	0	0	0	0	0	0	0	0	0	0	0	0	0	0	0	0	0	0	0	0	0	0	0	0	0	0	0
638	ASV638_Micrococcaceae_Micrococcus	0	0	0	0	0	0	0	0	0.457652	0	0	0	0	0	0	0	0	0	0	0	0	0	0	0	0	0	0	0	0	0	0	0	0	0	0	0	0	0	0	0	0	0	0.501852	0	0	0	0	0
640	ASV640_Hyphomicrobiaceae_Devosia	0.604972	0	0	0	0	0	0	0	0	0	0	0	0	0	0	0	0	0	0	0	0	0	0	0	0	0	0	0	0	0	0	0	0	0	0	0	0	0	0	0	0	0	0	0	0	0	0	0
641	ASV641_Lachnospiraceae_unclassified	0	0	0	0	0	0	0	0	0.647296	0	0	0	0	0	0.515737	0	0	0	0	0	0	0	0	0	0	0	0	0	0	0	0	0	0	0	0	0	0	0	0	0	0	0	0	0	0	0	0	0
642	ASV642_[Tissierellaceae]_Tissierella_Soehngenia	0	0	0	0	0	0.626227	0	0	0	0	0	0	0	0	0	0	0	0	0	0	0	0	0	0	0	0	0	0	0	0	0	0.76056	0	0	0	0	0	0	0	0	0	0	0	0	0	0	0	0
646	ASV646_Veillonellaceae_Succiniclasticum	0	0	0	0	0	0	0	0	0	0	0	0	0	0	0	0	0	0	0	0	0	0	0	0	0	0	0	0	0	0	0	0	0	0	0	0	0	0	0	0	0	0	0	0	0	0	0	0.608568
648	ASV648_[Tissierellaceae]_Helcococcus	0	0	0	0	0	0	0	0	0	0	0	0	0	0	0	0	0.649686	0	0	0	0	0	0	0	0	0	0	0	0	0	0	0	0	0	0	0	0	0	0	0	0	0	0	0	0	0	0	0
650	ASV650_Clostridiales_unclassified	0	0	0	0	0	0	0	0	0	0	0	0	0	0	0.521593	0	0	0	0.586169	0	0	0	0	0	0	0.567765	0	0	0	0	0	0	0	0	0	0	0	0	0	0	0	0	0	0	0	0	0	0
653	ASV653_Promicromonosporaceae_unclassified	0	0	0	0	0	0	0	0	0	0	0	0	0	0	0	0	0	0	0	0	0	0	0	0	0	0	0	0	0	0	0	0	0	0	0	0	0	0	0	0	0	0	0	0	0	0	0	0
656	ASV656_Planococcaceae_unclassified	0	0	0	0	0	0	0	0	0	0	0	0	0	0	0	0	0	0	0	0	0	0	0	0	0	0	0	0	0	0	0	0	0	0	0	0	0	0	0	0	0	0	0	0	0	0	0	0
659	ASV659_Alteromonadaceae_Candidatus Endobugula	0	0	0	0	0	0	0	0	0.454327	0	0	0	0	0	0	0	0	0	0	0	0	0	0	0	0	0	0	0	0	0	0	0	0	0	0	0	0	0	0	0	0	0	0	0	0	0	0	0
665	ASV665_Methanobacteriaceae_Methanobrevibacter	0	0	0	0.649973	0.709089	0	0	0	0.479899	0	0	0	0	0	0	0.455937	0	0	0	0	0	0	0	0	0	0	0.503494	0	0	0	0	0	0	0	0	0	0	0	0	0	0	0	0	0	0	0	0	0
668	ASV668_Xanthomonadaceae_unclassified	0	0.561705	0	0	0	0	0	0	0	0	0	0	0	0	0	0.402471	0	0	0	0	0	0	0	0	0	0	0.715781	0	0	0	0	0	0	0	0	0	0	0	0	0	0	0	0	0	0	0	0	0
671	ASV671_Porphyromonadaceae_unclassified	0	0	0	0	0	0	0	0	0	0	0	0	0	0	0	0	0	0	0	0	0	0	0	0	0	0	0	0	0	0	0	0	0	0	0	0	0	0	0	0	0	0	0	0	0	0	0	0
672	ASV672_Xanthomonadaceae_unclassified	0	0	0.551798	0	0	0	0	0	0	0	0	0	0	0	0	0	0	0	0	0	0	0	0	0	0	0	0	0	0	0	0	0	0	0	0	0	0	0	0	0	0	0	0	0	0	0	0	0
676	ASV676_Clostridiales_unclassified	0.746867	0	0	0	0	0	0	0	0	0	0	0	0	0	0	0	0	0	0	0	0	0	0	0	0	0	0	0	0	0	0	0	0	0	0	0	0	0	0	0	0	0	0	0	0.437497	0	0	0
680	ASV680_[Paraprevotellaceae]_[Prevotella]	0	0	0	0	0	0.759815	0	0	0	0	0	0	0	0	0	0	0	0	0	0	0	0	0	0	0	0	0	0	0	0	0	0	0	0	0	0	0	0	0	0	0	0	0	0	0	0	0	0
682	ASV682_Actinomycetaceae_unclassified	0	0	0	0	0	0	0	0	0	0	0	0	0	0	0	0	0	0	0.66053	0	0	0	0	0	0	0	0	0	0	0	0	0	0	0	0	0	0	0	0	0	0	0	0	0	0	0	0	0
684	ASV684_Microbacteriaceae_Leucobacter	0	0	0	0	0	0.519544	0	0	0	0	0.524563	0	0	0	0	0	0	0	0	0	0	0	0	0	0	0	0	0	0	0	0	0	0	0	0	0	0	0	0	0	0	0	0	0.637899	0	0	0	0
685	ASV685_Actinomycetaceae_unclassified	0	0	0	0	0	0	0	0	0	0	0	0	0	0	0	0	0	0	0	0	0	0	0	0	0	0	0	0	0	0	0	0	0	0	0	0	0	0	0	0	0	0	0	0	0	0	0	0
688	ASV688_Phyllobacteriaceae_unclassified	0	0	0	0	0	0	0	0	0	0	0	0	0	0	0	0	0	0	0	0	0	0	0	0	0	0	0	0	0	0	0	0	0	0	0	0	0	0	0	0	0	0	0	0	0	0	0	0
690	ASV690_Bacteria_unclassified	0	0	0	0	0	0	0	0	0	0	0	0	0	0	0	0	0	0	0	0	0	0	0	0	0	0	0	0	0	0	0	0	0.483931	0	0	0	0	0	0	0	0	0	0	0	0	0	0	0
697	ASV697_[Paraprevotellaceae]_YRC22	0	0	0	0	0	0	0	0	0	0	0	0	0	0	0	0	0	0	0.633632	0	0	0	0	0	0	0	0	0	0	0	0	0	0	0	0	0	0	0	0	0	0	0	0	0	0	0	0	0
701	ASV701_Pseudomonas_stutzeri	0	0	0	0	0	0	0	0	0	0	0	0	0	0	0.561885	0	0	0	0	0	0	0	0	0	0	0	0	0	0	0	0	0	0	0	0	0	0	0	0	0	0	0	0	0	0	0	0	0
708	ASV708_Lachnospiraceae_unclassified	0	0	0	0	0	0	0	0	0	0	0	0	0	0	0	0	0	0	0	0	0	0	0	0	0	0	0	0	0	0.698645	0	0	0	0	0	0	0	0	0	0	0	0	0	0	0.547843	0	0	0
714	ASV714_[Tissierellaceae]_GW-34	0	0	0	0	0	0	0	0	0	0	0	0	0	0	0	0	0	0	0	0	0	0	0	0	0	0	0	0	0	0	0	0	0	0	0	0	0	0	0	0	0	0	0	0	0	0	0	0
715	ASV715_Clostridiales_unclassified	0	0	0	0	0	0	0	0	0.544805	0	0	0	0	0	0	0	0	0	0	0	0	0	0	0	0	0	0	0	0	0	0	0	0	0	0	0	0	0	0	0	0	0	0	0	0	0	0.741025	0
716	ASV716_Alteromonadaceae_Marinobacter	0	0	0	0	0	0	0	0	0	0	0	0	0	0	0.491679	0	0	0	0	0	0	0	0	0	0	0	0	0	0	0	0	0	0	0	0	0	0	0	0	0	0	0	0.514646	0	0	0	0	0
718	ASV718_Bacteroidales_unclassified	0	0	0	0	0.938637	0	0	0	0	0	0	0	0	0	0	0	0	0	0	0	0	0	0	0	0	0	0	0	0	0	0	0	0	0	0	0	0	0	0	0	0	0	0	0	0	0	0	0
719	ASV719_[Tissierellaceae]_Sedimentibacter	0	0	0	0	0	0	0	0	0	0	0	0	0	0	0	0	0	0	0	0	0	0	0	0	0	0	0	0	0	0	0	0	0	0	0	0	0	0	0	0	0	0	0.548013	0	0	0	0	0
720	ASV720_[Paraprevotellaceae]_CF231	0	0	0	0	0	0	0	0	0	0	0	0	0	0	0	0	0	0	0	0	0	0	0	0	0	0	0	0	0	0	0	0	0.610638	0	0	0	0	0	0	0	0	0	0	0	0	0	0	0
726	ASV726_Yaniellaceae_Yaniella	0	0	0	0	0	0	0	0	0	0	0	0	0	0	0	0	0	0	0	0	0.640192	0	0	0	0	0	0	0	0	0	0	0	0	0	0	0	0	0	0	0	0	0	0	0	0	0	0	0
727	ASV727_Xanthomonadaceae_Luteimonas	0	0	0	0	0	0	0	0	0	0	0	0	0	0	0	0	0	0	0	0	0	0	0	0	0	0	0.49849	0	0	0	0	0	0.475225	0	0	0	0	0	0	0	0	0	0	0	0	0	0	0
731	ASV731_Flavobacteriaceae_unclassified	0	0	0	0	0	0	0	0	0	0	0	0	0	0	0	0	0	0	0	0	0	0	0	0	0	0	0	0	0	0	0	0	0	0	0	0	0	0	0	0	0	0	0.650093	0	0	0	0	0
734	ASV734_Xanthomonadaceae_Luteimonas	0	0	0	0	0	0	0	0	0	0	0	0	0	0	0	0	0	0	0	0	0	0	0	0	0	0	0	0	0	0	0	0	0	0	0	0	0	0	0	0	0	0	0	0	0	0	0	0
740	ASV740_Lachnospiraceae_Dorea	0	0	0	0	0	0	0	0	0	0	0	0	0	0	0	0	0	0	0	0	0	0	0	0	0	0	0	0	0	0	0	0	0	0	0	0	0	0	0	0	0	0	0	0	0	0	0	0
741	ASV741_Porphyromonadaceae_Paludibacter	0	0	0	0	0	0	0	0	0	0	0	0	0	0	0	0	0	0	0	0	0	0	0	0	0	0	0	0	0	0	0	0	0	0	0	0	0	0	0	0	0	0	0	0	0	0	0	0
743	ASV743_[Tissierellaceae]_ph2	0	0	0	0	0	0	0	0	0	0	0	0	0	0	0	0	0	0	0	0	0.913874	0	0	0	0	0	0	0	0	0	0	0	0	0	0	0	0	0	0	0	0	0	0	0	0	0	0	0
746	ASV746_Succinivibrionaceae_Ruminobacter	0	0	0	0	0	0	0	0	0	0	0	0	0	0	0.470719	0	0	0	0	0	0	0	0	0	0	0	0	0	0	0	0	0	0	0	0	0	0	0	0	0	0	0	0	0	0	0	0	0
747	ASV747_Microbacteriaceae_Leucobacter	0	0	0	0	0	0	0	0	0	0	0	0	0	0	0	0	0	0	0	0	0	0	0	0	0	0	0	0	0	0	0	0	0	0	0	0	0	0	0	0	0	0	0	0	0	0	0	0
753	ASV753_Bacteroidaceae_Bacteroides	0	0.608335	0	0	0	0	0	0	0	0	0	0	0	0	0	0	0	0	0	0	0	0	0	0	0	0	0	0	0	0	0	0	0	0	0	0	0	0	0	0	0	0	0.547276	0	0	0	0	0
761	ASV761_[Tissierellaceae]_Tissierella_Soehngenia	0.616556	0	0	0	0	0	0	0	0	0	0	0	0	0	0	0	0	0	0	0	0	0	0	0	0	0	0	0	0	0	0	0	0	0	0	0	0	0	0	0	0	0	0	0	0	0	0	0
767	ASV767_Faecalibacterium_prausnitzii	0	0	0	0	0	0	0	0	0	0	0	0	0	0	0	0	0	0	0	0	0	0	0	0	0	0	0	0	0	0	0	0	0.756146	0	0	0	0	0	0	0	0	0	0	0	0	0	0	0
771	ASV771_Lachnospiraceae_unclassified	0	0	0	0	0	0	0	0	0	0	0	0	0	0	0	0	0	0	0	0	0	0	0	0	0	0	0	0	0	0	0	0	0	0	0	0	0	0	0	0	0	0	0	0	0	0	0	0
772	ASV772_Prevotellaceae_Prevotella	0	0	0	0	0	0	0	0	0	0	0	0	0	0	0	0	0	0	0	0	0	0	0	0	0	0	0	0	0	0	0	0	0	0	0	0	0	0	0	0	0	0	0	0	0	0	0	0
775	ASV775_Microbacteriaceae_Pseudoclavibacter	0	0	0	0	0	0	0	0	0	0	0.560171	0	0	0	0	0	0	0	0	0	0	0	0	0	0	0	0	0	0	0	0	0	0	0	0	0	0	0	0	0	0	0	0	0	0	0	0	0
779	ASV779_planctomycete_MS3071	0	0	0	0	0	0	0	0	0	0	0	0	0	0	0	0	0	0	0	0	0	0	0	0	0	0	0	0	0	0	0	0	0	0	0	0	0	0	0	0	0	0	0.498365	0	0	0	0	0
788	ASV788_Moraxellaceae_Acinetobacter	0	0	0	0	0	0	0	0	0	0	0	0	0	0	0	0	0	0	0	0	0	0	0	0	0	0	0	0	0	0.659008	0	0	0	0	0	0	0	0	0	0	0	0	0	0	0	0	0	0
789	ASV789_[Weeksellaceae]_Wautersiella	0	0	0	0	0	0	0	0	0	0	0	0	0	0	0	0	0	0	0	0.990951	0	0	0	0	0	0	0	0	0	0	0	0	0	0	0	0	0	0	0	0	0	0	0	0	0	0	0	0
791	ASV791_Clostridiales_unclassified	0	0	0	0	0	0	0	0	0	0	0	0	0	0	0	0	0	0	0	0	0	0	0	0	0	0.996718	0	0	0	0	0	0	0	0	0	0	0	0	0	0	0	0	0	0	0	0	0	0
793	ASV793_Porphyromonadaceae_unclassified	0	0	0	0	0	0	0	0	0	0	0	0	0	0	0	0	0	0	0	0	0	0	0	0	0	0	0	0	0	0	0	0	0	0	0	0	0	0	0	0	0	0	0	0	0	0	0	0
795	ASV795_SR1_unclassified	0	0	0	0	0	0	0	0	0	0	0	0	0	0	0	0	0	0	0	0	0	0	0	0	0	0	0	0	0	0	0	0	0	0	0	0	0	0	0	0	0	0	0	0	0	0	0	0
799	ASV799_Cyclobacteriaceae_unclassified	0	0	0	0	0	0	0	0	0	0	0	0	0	0	0	0	0	0	0	0	0	0	0	0	0	0	0	0	0	0	0	0	0	0	0	0	0	0	0	0	0	0	0	0	0	0	0	0
813	ASV813_S24-7_unclassified	0	0	0	0	0	0	0	0	0	0	0	0	0	0	0	0	0	0	0	0	0	0	0	0	0	0	0	0	0	0	0	0	0	0	0	0	0	0	0	0	0	0	0	0	0	0	0	0
817	ASV817_Lachnospiraceae_Coprococcus	0	0	0	0	0	0	0	0	0	0	0	0	0	0	0	0	0	0	0	0	0	0	0	0	0	0	0	0	0	0	0	0	0	0	0	0	0	0	0	0	0	0	0	0	0	0	0	0
822	ASV822_Clostridiales_unclassified	0	0	0	0	0	0	0	0	0	0	0	0	0	0	0	0	0	0	0	0	0	0	0	0	0	0	0	0	0	0.589333	0	0	0	0	0	0	0	0	0	0	0	0	0	0	0	0	0	0
825	ASV825_Micrococcaceae_unclassified	0	0	0	0	0	0	0	0	0	0	0	0	0	0	0	0	0	0	0	0	0	0	0	0	0	0	0	0	0	0	0	0	0	0	0	0	0	0	0	0	0	0	0	0	0	0	0	0
826	ASV826_Flavobacteriaceae_unclassified	0	0.796038	0	0	0	0	0	0	0	0	0	0	0	0	0	0	0	0	0	0	0	0	0	0	0	0	0	0	0	0	0	0	0	0	0	0	0	0	0	0	0	0	0	0	0	0	0	0
827	ASV827_Bacteria_unclassified	0	0	0	0	0	0	0	0	0	0	0	0	0	0	0.653133	0	0	0	0	0	0	0	0	0	0	0	0	0	0	0	0	0	0	0	0	0	0	0	0	0	0	0	0	0	0.731198	0	0	0
831	ASV831_GMD14H09_unclassified	0.723521	0	0	0	0	0.579329	0	0	0	0	0	0	0	0	0	0	0	0	0	0	0	0	0	0	0	0	0	0	0	0	0	0	0	0	0	0	0	0	0	0	0	0	0	0	0.453273	0	0	0
832	ASV832_Bacteroidales_unclassified	0	0	0	0	0	0	0	0	0	0	0	0	0	0	0	0	0	0	0	0	0	0	0	0	0	0	0	0	0	0	0	0	0	0	0	0	0	0	0	0	0	0	0	0	0	0	0	0.497838
834	ASV834_Methanocorpusculaceae_Methanocorpusculum	0	0	0	0	0	0	0	0	0	0	0	0	0	0	0	0	0.808381	0	0	0	0	0	0	0	0	0	0	0	0	0	0	0	0	0	0	0	0	0	0	0	0	0	0	0	0	0	0	0
837	ASV837_Alteromonadaceae_Cellvibrio	0	0	0	0	0	0	0	0	0	0	0	0	0	0	0.523403	0	0	0	0	0	0	0	0	0	0	0	0	0	0	0	0	0	0	0	0	0	0	0.646964	0	0	0	0	0	0	0	0	0	0
838	ASV838_Clostridiales_unclassified	0	0	0	0	0	0	0	0	0	0	0	0	0	0	0	0	0	0	0	0	0	0	0	0	0	0	0	0	0	0	0	0	0	0	0	0	0	0	0	0	0	0	0	0	0	0	0	0
840	ASV840_Aerococcaceae_Alloiococcus	0	0	0	0	0	0	0	0	0	0	0	0	0	0	0	0	0	0	0	0	0	0	0	0	0	0	0	0	0	0	0	0	0	0	0	0	0	0	0	0	0	0	0	0	0	0	0	0
843	ASV843_Clostridiales_unclassified	0	0	0	0	0	0	0	0	0	0	0	0	0	0	0	0	0	0	0	0	0	0	0	0	0	0	0	0	0	0	0	0	0	0	0	0	0	0	0	0	0	0	0	0	0	0	0	0
847	ASV847_Xanthomonadaceae_Stenotrophomonas	0	0	0	0	0	0	0	0	0	0	0	0	0	0	0.615984	0	0	0	0	0	0	0	0	0	0	0	0	0	0	0	0	0	0	0	0	0	0	0	0	0	0	0	0	0	0	0	0	0
850	ASV850_[Tissierellaceae]_unclassified	0	0	0	0	0	0	0	0	0	0	0	0	0	0	0	0	0	0	0	0	0	0	0	0	0	0	0.652833	0	0	0	0	0	0	0	0	0	0	0	0	0	0	0	0	0	0	0	0	0
855	ASV855_Desulfomicrobiaceae_Desulfomicrobium	0	0	0	0	0	0	0	0	0	0	0	0	0	0	0	0	0	0	0	0	0	0	0	0	0	0	0	0	0	0	0	0	0	0	0	0	0	0	0	0	0	0	0	0	0	0	0	0
866	ASV866_[Paraprevotellaceae]_CF231	0	0	0	0	0	0	0	0	0	0	0	0	0	0	0	0	0	0	0	0	0	0	0	0	0	0	0	0	0	0	0	0	0	0	0	0	0	0	0	0	0	0	0	0	0	0	0	0
870	ASV870_Spirochaetaceae_Treponema	0.745326	0	0	0	0	0	0	0	0	0	0	0	0	0	0	0	0	0	0	0	0	0	0	0	0	0	0	0	0	0	0	0	0	0	0	0	0	0	0	0	0	0	0	0	0	0	0	0
871	ASV871_Sphingobacteriaceae_Sphingobacterium	0	0	0	0	0	0	0	0	0	0	0	0	0	0	0	0	0	0	0	0	0	0	0	0	0	0	0	0	0	0	0	0	0	0	0	0	0	0.611189	0	0	0	0	0	0.648617	0	0	0	0
872	ASV872_S24-7_unclassified	0.639683	0.727667	0	0	0	0	0	0	0	0	0.532469	0	0	0	0	0	0	0	0	0	0	0	0	0	0	0	0	0	0	0	0	0	0	0	0	0	0	0	0	0	0	0	0	0	0	0	0	0
878	ASV878_Hyphomicrobiaceae_Devosia	0.713867	0	0	0	0	0	0	0	0	0	0.652496	0	0	0	0	0	0	0	0.593492	0	0	0	0	0	0	0	0	0	0	0	0	0	0	0	0	0	0	0	0	0	0	0	0	0	0	0	0	0
880	ASV880_VC2_1_Bac22_unclassified	0	0	0	0	0	0	0	0	0	0	0	0	0	0	0	0	0	0	0	0	0	0	0	0	0	0	0	0	0	0	0	0	0	0	0	0	0	0	0	0	0	0	0.557853	0	0	0	0	0
881	ASV881_Ruminococcaceae_Ruminococcus	0	0	0	0	0	0	0	0	0	0	0	0	0	0	0	0	0	0	0	0	0	0	0	0	0	0	0	0	0	0	0	0	0	0	0	0	0	0	0	0	0	0	0	0	0	0	0	0
888	ASV888_[Tissierellaceae]_unclassified	0	0	0.640412	0	0	0	0	0	0	0	0	0	0	0	0	0	0	0	0	0	0	0	0	0	0	0	0	0	0	0	0	0	0	0	0	0	0	0	0	0	0	0	0	0	0	0	0	0
891	ASV891_[Weeksellaceae]_unclassified	0	0	0	0	0	0	0	0	0	0	0	0	0	0	0	0	0	0	0	0	0	0	0	0	0	0	0	0	0	0	0	0	0	0	0	0	0	0	0	0	0	0	0	0	0	0	0	0
895	ASV895_Prevotellaceae_Prevotella	0	0	0	0	0	0	0	0	0	0	0	0	0	0	0	0	0	0	0	0	0	0	0	0	0	0	0	0	0	0	0	0	0	0	0	0	0	0	0	0	0	0	0	0	0	0	0	0
896	ASV896_Trueperaceae_unclassified	0	0	0	0	0	0	0	0	0	0	0	0	0	0	0	0	0	0	0	0	0	0	0	0	0	0	0	0	0	0	0	0	0	0	0	0	0	0	0	0	0	0	0	0	0	0	0	0
897	ASV897_Intrasporangiaceae_unclassified	0	0	0	0	0	0	0	0	0	0	0	0	0	0	0.605675	0	0	0	0	0	0	0	0	0	0	0	0	0	0	0	0	0	0	0	0	0	0	0	0	0	0	0	0	0	0	0	0	0
899	ASV899_Clostridiales_unclassified	0	0	0	0	0	0	0	0	0	0	0	0	0	0	0	0	0	0	0	0	0	0	0	0	0	0	0	0	0	0	0	0	0	0	0	0	0	0	0	0	0	0	0	0	0	0	0	0
902	ASV902_Sinobaca_beijingensis	0	0	0	0	0	0	0	0	0	0	0	0	0	0	0	0	0	0	0	0	0	0	0	0	0	0	0	0	0	0	0	0	0	0	0	0	0	0	0	0	0	0	0	0	0	0	0	0
904	ASV904_Bacteroidales_unclassified	0	0	0	0	0	0	0	0	0	0	0	0	0	0	0	0	0	0	0	0	0	0	0	0	0	0	0	0	0	0	0	0	0	0	0	0	0	0	0	0	0	0	0	0	0	0	0	0
905	ASV905_Porphyromonadaceae_unclassified	0	0	0	0	0	0	0	0	0	0	0	0	0	0	0	0	0	0	0	0	0	0	0	0	0	0	0	0	0	0	0	0	0	0	0	0	0	0	0	0	0	0	0	0	0.5256	0	0	0
906	ASV906_Ruminococcaceae_unclassified	0.593071	0	0.583935	0	0	0	0	0	0	0	0	0	0	0	0	0	0	0	0	0	0	0	0	0	0	0	0	0	0	0	0	0	0	0	0	0	0	0	0	0	0	0	0	0	0	0	0	0
907	ASV907_[Weeksellaceae]_unclassified	0	0	0	0	0	0	0	0	0	0	0	0	0	0	0	0	0	0	0	0	0	0	0	0	0	0	0	0	0	0	0	0	0	0	0	0	0	0	0	0	0	0	0	0	0	0	0	0
910	ASV910_Clostridiaceae_Clostridium	0	0	0	0	0	0.642141	0	0	0	0	0	0	0	0	0	0	0	0	0	0	0	0	0	0	0	0	0	0	0	0	0	0	0	0	0	0	0	0	0	0	0	0	0	0	0	0	0	0
912	ASV912_[Tissierellaceae]_unclassified	0	0	0	0	0	0	0	0	0	0	0	0	0	0	0	0	0	0	0	0	0	0	0	0	0	0	0	0	0	0	0	0	0	0	0	0	0	0	0	0	0	0	0	0	0	0	0	0
913	ASV913_[Paraprevotellaceae]_[Prevotella]	0	0	0	0	0	0	0	0	0	0	0	0	0	0	0	0	0	0	0	0	0	0	0	0	0	0	0	0	0	0	0	0	0	0	0	0	0	0	0	0	0	0	0	0	0.617094	0	0	0
917	ASV917_Sphingobacteriaceae_Sphingobacterium	0	0	0	0	0	0	0	0	0	0	0	0	0	0	0	0	0	0	0	0	0	0	0	0	0	0	0	0	0	0	0	0	0	0	0	0	0	0	0	0	0	0	0	0	0	0	0	0
918	ASV918_Veillonellaceae_Veillonella	0	0	0	0	0	0	0	0	0	0	0	0	0	0	0	0	0	0	0	0	0	0	0	0	0	0	0	0	0	0	0	0	0	0	0	0	0	0	0	0	0	0	0	0	0	0	0	0
919	ASV919_Actinomyces_europaeus	0	0	0	0	0	0	0	0	0	0	0	0	0	0	0	0	0	0	0.752359	0	0	0	0	0	0	0	0	0	0	0	0	0	0.563083	0	0	0	0	0	0	0	0	0	0	0	0	0	0	0
927	ASV927_[Mogibacteriaceae]_unclassified	0	0	0	0	0	0	0	0	0	0	0	0	0	0	0	0	0	0	0	0	0	0	0	0	0	0	0	0	0	0	0	0	0	0	0	0	0	0	0	0	0	0	0	0	0	0	0	0
928	ASV928_Acholeplasmataceae_Acholeplasma	0	0	0	0	0	0	0	0	0	0	0	0	0	0	0	0	0	0	0	0	0	0	0	0	0	0	0	0	0	0	0	0	0	0	0	0	0	0	0	0	0	0	0	0	0.631425	0	0	0
930	ASV930_Bacteroides_plebeius	0	0	0	0	0	0	0	0	0	0	0	0	0	0	0	0	0	0	0	0	0	0	0	0	0	0	0	0	0	0	0	0	0	0	0	0	0	0	0	0	0	0	0	0	0	0	0	0
931	ASV931_Rhodobacteraceae_Anaerospora	0	0	0	0	0	0.643461	0	0	0	0	0	0	0	0	0	0	0	0	0	0	0	0	0	0	0	0	0	0	0	0	0	0	0	0	0	0	0	0	0	0	0	0	0	0	0	0	0	0
932	ASV932_Cytophagaceae_unclassified	0	0	0	0	0	0	0	0	0	0	0	0	0	0	0	0	0	0	0	0	0	0	0	0	0	0	0	0	0	0	0	0	0	0	0	0	0	0	0	0	0	0	0	0	0	0	0	0
933	ASV933_Succinivibrionaceae_Ruminobacter	0	0	0	0	0	0	0	0	0	0	0	0	0	0	0	0	0	0	0	0	0	0	0	0	0	0	0	0	0	0	0	0	0	0	0	0	0	0	0	0	0	0	0	0	0	0	0	0
939	ASV939_[Paraprevotellaceae]_[Prevotella]	0	0	0	0	0	0	0	0	0	0	0	0	0	0	0	0.671569	0	0	0	0	0	0	0	0	0	0	0	0	0	0	0	0	0	0	0	0	0	0	0	0	0	0	0	0	0	0	0	0
945	ASV945_Sphingobacteriaceae_unclassified	0	0	0	0	0	0	0	0	0	0	0	0	0	0	0	0	0	0	0	0	0	0	0	0	0	0	0	0	0	0	0	0	0	0	0	0	0	0	0	0	0	0	0	0	0	0	0	0
951	ASV951_Planctomycetaceae_Planctomyces	0	0	0	0	0	0	0	0	0	0	0	0	0	0	0	0	0	0	0	0	0	0	0	0	0	0	0	0	0	0	0	0	0	0	0	0	0	0	0	0	0	0	0	0	0	0	0	0
953	ASV953_Clostridiaceae_Clostridium	0	0	0	0	0	0	0	0	0	0	0	0	0	0	0	0	0	0	0	0	0	0	0	0	0	0	0	0	0	0	0	0	0	0	0	0	0	0	0	0	0	0	0	0	0	0	0	0.659567
954	ASV954_Actinomycetaceae_unclassified	0	0	0	0	0	0	0	0	0	0	0.496254	0	0	0	0	0	0	0	0	0	0	0	0	0	0	0	0	0	0	0	0	0	0	0	0	0	0	0	0	0	0	0	0	0	0	0	0	0
960	ASV960_Porphyromonadaceae_unclassified	0	0	0	0	0	0	0	0	0	0	0	0	0	0	0	0	0	0	0	0	0	0	0	0	0	0	0	0	0	0	0	0	0	0	0	0	0	0	0	0	0	0	0	0	0	0	0	0.529395
961	ASV961_Chitinophagaceae_unclassified	0	0	0	0	0	0	0	0	0	0	0	0	0	0	0	0	0	0	0	0	0	0	0	0	0	0	0.646137	0	0	0	0	0	0	0	0	0	0	0	0	0	0	0	0.536712	0	0	0	0	0
962	ASV962_[Weeksellaceae]_unclassified	0	0	0	0	0	0	0	0	0.652996	0	0	0	0	0	0	0	0	0	0	0	0	0	0	0	0	0	0	0	0	0	0	0	0	0	0	0	0	0	0	0	0	0	0	0	0.582074	0	0	0
967	ASV967_Streptococcaceae_Streptococcus	0	0	0	0	0	0	0	0	0	0	0	0	0	0	0	0	0	0	0	0	0	0	0	0	0	0	0.656908	0	0	0	0	0	0	0	0	0	0	0	0	0	0	0	0	0	0	0	0	0
968	ASV968_Phyllobacteriaceae_unclassified	0	0	0	0	0	0	0	0	0	0	0	0	0	0	0	0	0	0	0	0	0	0	0	0	0	0	0	0	0	0	0	0	0	0	0	0	0	0	0	0	0	0	0	0	0	0	0	0
971	ASV971_Porphyromonadaceae_unclassified	0	0	0	0	0	0	0	0	0	0	0	0	0	0	0	0	0	0	0	0	0	0	0	0	0	0	0	0	0	0	0	0	0	0	0	0	0	0	0	0	0	0	0	0	0	0	0	0
974	ASV974_Actinomycetaceae_N09	0	0	0	0	0	0	0	0	0	0	0	0	0	0	0	0	0	0	0	0	0	0	0	0	0	0	0	0	0	0	0	0	0	0	0	0	0	0	0	0	0	0	0	0	0	0	0	0.611342
986	ASV986_[Paraprevotellaceae]_YRC22	0	0	0	0	0	0	0	0	0	0	0	0	0	0	0	0	0	0	0	0	0	0	0	0	0	0	0	0	0	0	0	0	0	0	0	0	0	0	0	0	0	0	0	0	0	0	0	0
989	ASV989_Ruminococcaceae_unclassified	0	0	0	0	0	0.601865	0	0	0	0	0	0	0	0	0	0	0	0	0	0	0	0	0	0	0	0	0	0	0	0	0	0	0	0	0	0	0	0	0	0	0	0	0	0	0	0	0	0
993	ASV993_Pseudoxanthomonas_suwonensis	0	0	0	0	0	0	0	0	0	0	0	0	0	0	0.535523	0	0	0	0	0	0	0	0	0	0	0	0	0	0	0.707429	0	0	0	0	0	0	0	0	0	0	0	0	0	0	0	0	0	0
1005	ASV1005_Peptococcaceae_Niigata-25	0	0	0	1	0	0	0	0	0	0	0	0	0	0	0	0	0	0	0	0	0	0	0	0	0	0	0	0	0	0	0	0	0	0	0	0	0	0	0	0	0	0	0	0	0	0	0	0
1009	ASV1009_Clostridiaceae_Clostridium	0	0	0	0	1	0	0	0	0	0	0	0	0	0	0	0	0	0	0	0	0	0	0	0	0	0	0	0	0	0	0	0	0	0	0	0	0	0	0	0	0	0	0	0	0	0	0	0
1012	ASV1012_Rhodobacteraceae_Paracoccus	0	0	0	0	0	0	1	0	0	0	0	0	0	0	0	0	0	0	0	0	0	0	0	0	0	0	0	0	0	0	0	0	0	0	0	0	0	0	0	0	0	0	0.539244	0	0	0	0	0
1013	ASV1013_Pseudomonadaceae_unclassified	0	0	0	0	0	0	0	1	0	0	0	0	0	0	0	0	0	0	0	0	0	0	0	0	0	0	0.592754	0	0	0	0	0	0.535672	0	0	0	0	0	0	0	0	0	0	0	0	0	0	0
1027	ASV1027_S24-7_unclassified	0	0	0	0	0	0	0	0	0	1	0	0	0	0	0	0.555655	0	0	0	0	0	0	0	0	0	0	0	0	0	0	0	0	0	0	0	0	0	0	0	0	0	0	0	0	0	0	0	0
1030	ASV1030_PRR-11_unclassified	0	0	0	0	0	0	0	0	0	0	0	1	0	0	0	0	0	0	0	0	0	0	0	0	0	0	0	0	0	0	0	0	0	0	0	0	0	0	0	0	0	0	0.622913	0	0.579869	0	0	0
1033	ASV1033_Succinivibrionaceae_unclassified	0	0	0	0	0	0	0	0	0	0	0	0	1	0	0	0	0	0	0	0	0	0	0	0	0	0	0	0	0	0	0	0	0	0	0	0	0	0	0	0	0	0	0	0	0	0	0	0
1036	ASV1036_[Saprospirales]_unclassified	0	0	0	0	0	0	0	0	0	0	0	0	0	1	0	0	0	0	0	0	0	0	0	0	0	0	0	0	0	0	0	0	0	0	0	0	0	0	0	0	0	0	0.810487	0	0	0	0	0
1052	ASV1052_[Paraprevotellaceae]_YRC22	0	0	0	0	0	0	0	0	0	0	0	0	0	0	0	0	1	0	0	0	0	0	0	0	0	0	0	0	0	0.577475	0	0	0	0	0	0	0	0	0	0	0	0	0	0	0	0	0	0
1054	ASV1054_Gordoniaceae_Gordonia	0	0	0	0	0	0	0	0	0	0	0	0	0	0	0	0	0	1	0	0	0	0	0	0	0	0	0	0	0	0	0	0	0	0	0	0	0	0	0	0	0	0	0	0	0	0	0	0
1063	ASV1063_Anaerolinaceae_T78	0	0	0	0	0	0	0	0	0	0	0	0	0	0	0	0	0	0	0	1	0	0	0	0	0	0	0	0	0	0.548144	0	0	0	0	0	0	0	0	0	0	0	0	0	0	0	0	0	0
1071	ASV1071_Porphyromonadaceae_Paludibacter	0	0	0	0	0	0	0	0	0	0	0.559204	0	0	0	0	0	0	0	0	0	1	0	0	0	0	0	0	0	0	0	0	0	0	0	0	0	0	0	0	0	0	0	0.623493	0	0	0	0	0
1073	ASV1073_Clostridiaceae_Clostridium	0	0	0	0	0	0	0	0	0	0	0	0	0	0	0	0	0	0	0	0	0	1	0	0	0	0	0	0	0	0	0	0	0	0	0	0	0	0	0	0	0	0	0	0	0	0	0	0.670345
1082	ASV1082_Ruminococcus_bromii	0	0	0	0	0	0	0	0	0	0	0	0	0	0	0	0	0	0	0.593568	0	0	0	1	0	0	0	0	0	0	0	0	0	0	0	0	0	0	0	0	0	0	0	0	0	0	0	0	0
1083	ASV1083_Pseudomonadaceae_Pseudomonas	0	0	0.573655	0	0	0	0	0	0	0	0	0	0	0	0	0.633181	0	0	0	0	0	0	0	1	0	0	0	0	0	0	0	0	0	0	0	0	0	0	0	0	0	0	0	0	0	0	0	0
1084	ASV1084_Spirochaetaceae_Treponema	0	0	0	0	0	0	0	0	0	0	0	0	0	0	0	0	0	0	0	0	0	0	0	0	1	0	0	0	0	0	0	0	0	0	0	0	0	0	0	0	0	0	0	0	0	0	0	0
1086	ASV1086_Flavobacteriaceae_unclassified	0	0	0	0	0	0	0	0	0	0	0	0	0	0	0	0	0	0	0	0	0	0	0	0	0	1	0	0	0	0	0	0	0	0	0	0	0	0	0	0	0	0	0	0	0	0	0	0
1095	ASV1095_Bacteria_unclassified	0	0	0	0	0	0	0	0	0	0	0	0	0	0	0.524464	0	0	0	0	0	0	0	0	0	0	0	0	1	0	0	0	0	0	0	0	0	0	0	0	0	0	0	0	0	0	0	0	0
1098	ASV1098_Thermovum_composti	0	0	0	0	0	0	0	0	0	0	0	0	0	0	0	0	0	0	0	0	0	0	0	0	0	0	0	0	1	0	0	0	0	0	0	0	0	0	0	0	0	0	0	0	0	0	0	0
1102	ASV1102_Sphingobacterium_mizutaii	0	0	0	0	0	0	0	0	0	0	0	0	0	0	0	0	0	0	0	0	0	0	0	0	0	0	0	0	0	0	1	0	0	0	0	0	0	0	0	0	0	0	0	0	0	0	0	0
1108	ASV1108_Acholeplasma_laidlawii	0	0	0	0	0	0	0	0	0	0	0	0	0	0	0	0	0	0	0	0	0	0	0	0	0	0	0	0	0	0	0	1	0	0	0	0	0	0	0	0	0	0	0	0	0	0	0	0
1110	ASV1110_Pseudomonadaceae_unclassified	0	0	0	0	0	0	0	0	0	0	0	0	0	0	0	0	0	0	0	0	0	0	0	0	0	0	0	0	0	0	0	0	0	1	0	0	0	0	0	0	0	0	0	0	0	0	0	0
1114	ASV1114_Bacteroidaceae_Bacteroides	0	0	0	0	0	0	0	0	0	0	0	0	0	0	0	0	0	0	0	0	0	0	0	0	0	0	0	0	0	0	0	0	0	0	1	0	0	0	0	0	0	0	0	0	0	0	0	0
1120	ASV1120_Sphingobacteriaceae_unclassified	0	0	0	0	0	0	0	0	0	0	0	0	0	0	0	0	0	0	0	0	0	0	0	0	0	0	0	0	0	0	0	0	0	0	0	1	0	0	0	0	0	0	0	0	0	0	0	0
1121	ASV1121_Xanthomonadaceae_Luteimonas	0.654912	0	0.759372	0	0	0	0	0	0	0	0	0	0	0	0	0	0	0	0.672734	0	0	0	0	0	0	0	0.678919	0	0	0	0	0	0	0	0	0	1	0	0	0	0	0	0	0	0	0	0	0
1130	ASV1130_Intrasporangiaceae_unclassified	0	0	0	0	0	0	0	0	0	0	0	0	0	0	0	0	0	0	0	0	0	0	0	0	0	0	0	0	0	0	0	0	0	0	0	0	0	0	1	0	0	0	0	0	0	0	0	0
1131	ASV1131_[Tissierellaceae]_unclassified	0	0	0	0	0	0	0	0	0.673967	0	0	0	0	0	0	0	0	0	0	0	0	0	0	0	0	0	0	0	0	0	0	0	0	0	0	0	0	0	0	1	0	0	0	0	0	0	0	0
1137	ASV1137_Porphyromonadaceae_Paludibacter	0	0	0	0	0	0	0	0	0	0	0	0	0	0	0	0	0	0	0	0	0	0	0	0	0	0	0	0	0	0	0	0	0	0	0	0	0	0	0	0	1	0	0	0	0	0	0	0
1149	ASV1149_Rhodobacteraceae_unclassified	0	0	0	0	0	0	0	0	0	0	0	0	0	0	0	0	0	0	0	0	0	0	0	0	0	0	0	0	0	0	0	0	0	0	0	0	0	0	0	0	0	1	0	0	0	0	0	0
1157	ASV1157_[Weeksellaceae]_unclassified	0	0	0	0	0	0	0	0	0	0	0	0	0	0	0	0	0	0	0	0	0	0	0	0	0	0	0	0	0	0	0	0	0	0	0	0	0	0	0	0	0	0	0	1	0.606875	0	0	0
1160	ASV1160_Intrasporangiaceae_unclassified	0	0	0	0	0	0	0	0	0	0	0	0	0	0	0.6999	0	0	0	0	0	0	0	0	0	0	0	0	0	0	0	0	0	0	0	0	0	0	0	0	0	0	0	0	0	0	1	0	0
1164	ASV1164_Lachnospiraceae_Coprococcus	0	0	0	0	0	0	0	0	0	0	0	0	0	0	0	0	0	0	0	0	0	0	0	0	0	0	0	0	0	0	0	0	0	0	0	0	0	0	0	0	0	0	0	0	0	0	1	0
1170	ASV1170_Flavobacteriaceae_unclassified	0	0	0	0	0	0	0	0	0	0	0	0	0	0	0	0	0	0	0	0	0	0	0	0	0	0	0	0	0	0	0	0	0	0	0	0	0	0	0	0	0	0	0	0	0	0	0	0
1179	ASV1179_Microbacteriaceae_Leucobacter	0	0	0	0	0	0	0	0	0	0	0	0	0	0	0	0	0	0	0	0	0	0	0	0	0	0	0	0	0	0	0	0	0	0	0	0	0	0	0	0	0	0	0.672627	0	0	0	0	0
1187	ASV1187_Sphingobacteriaceae_Sphingobacterium	0	0.680018	0	0	0	0	0	0	0.623787	0	0	0	0	0	0	0	0	0	0	0	0	0	0	0	0	0	0	0	0	0	0	0	0	0	0	0	0	0	0	0	0	0	0	0	0	0	0	0
1192	ASV1192_Microbacteriaceae_Leucobacter	0	0	0	0	0	0	0	0	0	0	0	0	0	0	0	0	0	0	0	0	0	0	0	0	0	0	0	0	0	0	0	0	0	0	0	0	0	0	0	0	0	0	0	0	0	0	0	0
1207	ASV1207_Flavobacteriaceae_unclassified	0	0	0	0	0	0	0	0	0	0	0	0	0	0	0	0	0	0	0	0	0	0	0	0	0	0	0	0	0	0	0	0	0	0	0	0	0	0	0	0	0	0	0	0	0	0	0	0
1215	ASV1215_Actinomycetaceae_unclassified	0	0	0	0	0	0	0	0	0	0	0	0	0	0	0	0	0	0	0	0	0	0	0	0	0	0	0	0	0	0	0	0	0	0	0	0	0	0	0	0	0	0	0	0	0	0	0	0
1216	ASV1216_Lachnospiraceae_Dorea	0	0	0	0	0	0	0	0	0	0	0.597328	0	0	0	0	0	0	0	0	0	0	0	0	0	0	0	0	0	0	0	0	0	0	0	0	0	0	0	0	0	0	0	0	0	0	0	0	0
1220	ASV1220_Lachnospiraceae_unclassified	0	0	0	0	0	0	0	0	0	0	0	0	0	0	0	0	0	0	0	0	0	0	0	0	0	0	0	0	0	0	0	0	0	0	0	0	0	0	0	0	0	0	0	0	0	0	0	0
1221	ASV1221_Hyphomicrobiaceae_Devosia	0	0	0	0	0	0	0	0	0	0	0	0	0	0	0	0	0	0	0.719973	0	0	0	0	0	0	0	0	0	0	0	0	0	0	0	0	0	0	0.693261	0	0	0	0	0	0	0	0	0	0
1222	ASV1222_Rhodobacteraceae_unclassified	0.644851	0.76904	0	0	0	0	0	0	0	0	0	0	0	0	0	0	0	0	0	0	0	0	0	0	0	0	0	0	0	0	0	0	0	0	0	0	0	0	0	0	0	0	0	0	0	0	0	0
1225	ASV1225_Cellulomonadaceae_Demequina	0	0	0	0	0	0	0	0	0	0	0	0	0	0	0	0	0	0	0	0	0	0	0	0	0	0	0	0	0	0	0	0	0	0	0	0	0	0	0	0	0	0	0	0	0	0	0	0
1228	ASV1228_Ruminococcaceae_unclassified	0	0	0	0	0	0	0	0	0	0	0	0	0	0	0	0	0	0	0	0	0	0	0	0	0	0	0	0	0	0	0	0	0	0	0	0	0	0	0	0	0	0	0	0	0	0	0	0
1236	ASV1236_Sphingobacteriaceae_unclassified	0	0	0	0	0	0	0	0	0	0	0	0	0	0	0	0	0	0	0	0	0	0	0	0	0	0	0	0	0	0	0	0	0	0	0	0	0	0	0	0	0	0	0	0	0	0	0	0
1242	ASV1242_S24-7_unclassified	0.729421	0	0	0	0	0	0	0	0	0	0	0	0	0	0	0	0	0	0	0	0	0	0	0	0	0	0	0	0	0	0	0	0	0	0	0	0	0	0	0	0	0	0	0	0	0	0	0
1245	ASV1245_Piscirickettsiaceae_Methylophaga	0.664514	0	0	0	0	0	0	0	0	0	0	0	0	0	0	0.666157	0	0	0	0	0	0	0	0	0	0	0	0	0	0	0	0	0	0	0	0	0	0	0	0	0	0	0	0	0	0	0	0
1248	ASV1248_Prevotellaceae_Prevotella	0	0	0	0	0	0	0	0	0	0	0	0	0	0	0	0	0	0	0	0	0	0	0	0	0	0	0	0	0	0.696203	0	0	0	0	0	0	0	0	0	0	0	0	0.557227	0	0	0	0	0
1262	ASV1262_Veillonellaceae_Megasphaera	0	0	0.655941	0	0	0	0	0	0	0	0	0	0	0	0	0	0	0	0	0	0	0	0	0	0	0	0	0	0	0	0	0	0	0	0	0	0	0	0	0	0	0	0	0	0	0	0	0
1272	ASV1272_Porphyromonadaceae_unclassified	0	0	0	0	0	0	0	0	0	0	0	0	0	0	0	0	0	0	0	0	0	0	0	0	0	0	0	0	0	0	0	0	0	0	0	0	0	0	0	0	0	0	0	0	0	0	0	0.562665
1281	ASV1281_Gammaproteobacteria_unclassified	0	0	0	0	0	0	0	0	0	0	0	0	0	0	0	0	0	0	0	0	0	0	0	0	0	0	0	0	0	0	0	0	0	0	0	0	0	0	0	0	0	0	0	0	0	0	0	0
1283	ASV1283_Cryomorphaceae_Fluviicola	0	0	0	0	0	0	0	0	0	0	0	0	0	0	0	0	0	0	0	0	0	0	0	0	0	0	0	0	0	0	0	0	0	0	0	0	0	0	0	0	0	0	0	0	0	0	0	0
1330	ASV1330_Halomonadaceae_unclassified	0	0	0	0	0	0.709635	0	0	0	0	0	0	0	0	0	0	0	0	0	0	0	0	0	0	0	0	0	0	0	0	0	0	0	0	0	0	0	0	0	0	0	0	0	0	0	0	0	0
1355	ASV1355_Rhodobacteraceae_Anaerospora	0	0	0	0	0	0	0	0	0	0	0	0	0	0	0	0	0	0	0	0	0	0	0	0	0	0	0	0	0	0	0	0	0	0	0	0	0	0	0	0	0	0	0	0	0	0	0	0
1358	ASV1358_Clostridiaceae_unclassified	0	0	0	0	0	0	0	0	0	0	0	0	0	0	0	0	0	0	0	0	0	0	0	0	0	0	0	0	0	0	0	0	0	0	0	0	0	0	0	0	0	0	0	0	0	0	0	0.613186
1369	ASV1369_Leuconostocaceae_unclassified	0	0	0	0	0	0	0	0	0	0	0	0	0	0	0	0	0	0	0	0	0	0	0	0	0	0	0	0	0	0	0	0	0	0	0	0	0	0	0	0	0	0	0	0	0	0	0	0
1487	ASV1487_[Paraprevotellaceae]_YRC22	0	0	0	0	0	0	0	0	0	0	0	0	0	0	0	0	0	0	0	0	0	0	0	0	0	0	0	0	0	0	0	0	0	0	0	0	0	0	0	0	0	0	0	0	0	0	0	0
1546	ASV1546_Actinomycetaceae_Trueperella	0	0	0	0	0	0	0	0	0	0	0	0	0	0	0	0	0	0	0	0	0	0	0	0	0	0	0	0	0	0	0	0	0	0	0	0	0	0	0	0	0	0	0	0	0.680965	0	0	0.581283
[truncated: 441 more columns]

## Sheet: Suppl. Table 3
Supplementary Table 3. Sparse Estimation of Correlations among Microbiomes (SECOM) Spearman (P value filtering) Matrix quantifying monotonic/linear relationships between taxa in the bovine nasal cavity (full table)
	Values are Spearman correlation coefficients
	Non-zero values indicate a monotonic/linear relationship between taxa (P < 0.05)
	Negative values indicate a negative relationship, and positive values indicate a positive relationship (P < 0.05)
	Zero values indicate no monotonic/linear relationships between taxa
	If a significant Spearman correlation coefficient exists for a pair of ASVs, but no distance correlation coefficient is found (Suppl. Table 2) Spearman correlation coefficient should be interpreted carefully
num		ASV1_Mycoplasma_hyorhinis	ASV10_Histophilus_somni	ASV100_Jeotgalicoccus_psychrophilus	ASV1005_Peptococcaceae_Niigata-25	ASV1009_Clostridiaceae_Clostridium	ASV101_Corynebacteriaceae_Corynebacterium	ASV1012_Rhodobacteraceae_Paracoccus	ASV1013_Pseudomonadaceae_unclassified	ASV102_[Weeksellaceae]_unclassified	ASV1027_S24-7_unclassified	ASV103_Rhodobacteraceae_unclassified	ASV1030_PRR-11_unclassified	ASV1033_Succinivibrionaceae_unclassified	ASV1036_[Saprospirales]_unclassified	ASV104_Micrococcaceae_Arthrobacter	ASV105_Olsenella_umbonata	ASV1052_[Paraprevotellaceae]_YRC22	ASV1054_Gordoniaceae_Gordonia	ASV106_Pasteurellaceae_unclassified	ASV1063_Anaerolinaceae_T78	ASV1071_Porphyromonadaceae_Paludibacter	ASV1073_Clostridiaceae_Clostridium	ASV1082_Ruminococcus_bromii	ASV1083_Pseudomonadaceae_Pseudomonas	ASV1084_Spirochaetaceae_Treponema	ASV1086_Flavobacteriaceae_unclassified	ASV109_Carnobacteriaceae_Trichococcus	ASV1095_Bacteria_unclassified	ASV1098_Thermovum_composti	ASV11_Enterobacteriaceae_unclassified	ASV1102_Sphingobacterium_mizutaii	ASV1108_Acholeplasma_laidlawii	ASV111_Prevotellaceae_Prevotella	ASV1110_Pseudomonadaceae_unclassified	ASV1114_Bacteroidaceae_Bacteroides	ASV1120_Sphingobacteriaceae_unclassified	ASV1121_Xanthomonadaceae_Luteimonas	ASV113_Corynebacterium_stationis	ASV1130_Intrasporangiaceae_unclassified	ASV1131_[Tissierellaceae]_unclassified	ASV1137_Porphyromonadaceae_Paludibacter	ASV1149_Rhodobacteraceae_unclassified	ASV115_Moraxellaceae_Acinetobacter	ASV1157_[Weeksellaceae]_unclassified	ASV116_Turicibacteraceae_Turicibacter	ASV1160_Intrasporangiaceae_unclassified	ASV1164_Lachnospiraceae_Coprococcus	ASV117_Alcaligenaceae_Oligella
1	ASV1_Mycoplasma_hyorhinis	1	0.343602	0	-0.56044	0	-0.319649	0	0	0	0	0	0	0	0	0	0	0	0	0	0	0	0	0.564835	0	0.648119	0.520886	0	0	0	0.360282	0	0	0.240085	0.534654	0	0	0.692857	0	0	0	0	0.648485	0	0	0	0	0	0
2	ASV2_Microbacteriaceae_unclassified	0.254047	0	0	0	0	0	0	0	0	0	0	0	0	0	0	0	0	0	0	0	0	0	0	0	0	-0.456341	0	0	0	0	-0.689286	0	0	0	0	0	0	0	0	0	0.50184	0	0	0	0	0	0	0
3	ASV3_Pasteurellaceae_Aggregatibacter	0	0	0	0	0	0	0	0	-0.310248	0	-0.445745	0	0	0.739245	0	0	0	0	0	0	0.582418	0	0	0	0	0.747253	0	0	0	0	0	0	0	0	0.830303	0	0	0	0.661998	0	0	0	0	0	0	0	0.736264	0
4	ASV4_Pasteurellaceae_Mannheimia	0	0	0	0	0	0	0	0	0	0	0	0	0	0	0	-0.387625	0	0	-0.592556	0	0	0	0	0	0	0	0	0	0	0	0	0	0	0	0	0	0	0	0	0	0	0	0	0	0	0	0	0
5	ASV5_Mycoplasmataceae_Mycoplasma	0.417472	0.505609	0	0	0	0	0	0	0	0	-0.417288	0	0	0	0	0	0	0	0	0	0	0	0.681818	0	0	0	0	0	0	0	0	0	0	0	0	0	0	-0.487821	0	0	0	0	0	0	0	0	0	0
7	ASV7_Mycoplasmataceae_Mycoplasma	0.345569	0	0	0	0	-0.39258	0	0	-0.274365	0	0	0	0	0	0	0	0.478949	0	0	0	0	0	0	0	0	0	0	0	0	0	0	0	0	0	0	0	0.546429	0	0.854642	0	0	0	0	0	0	0	0	0
8	ASV8_Pasteurellaceae_Pasteurella	0.255081	0	0	0	0	0	0	0.488132	0	0	0	0	0	0	0	0	0	0	0	0	0	0	0.486068	0	0	0	0	0	0	0	0	0.494068	0.287124	0	0	0	0	0	0	0	0	0.621978	0	0	0	0	0	0
9	ASV9_Moraxellaceae_Moraxella	0	0	0	0	0	0	0	0	0	0	0	0	0	0	0	0	0	0	0	0	0	0	0	0	0	0	0	0	0	0.485714	0	0	0.566545	0	0	0	0	0.450545	0	0	0	0	0	0	-0.376078	0	0	0.395269
10	ASV10_Histophilus_somni	0.343602	1	0	-0.745455	0	0	0	0	0	0	0	0	0	0	0	0	0	0	0	0	0	0	0.78459	0	0	0	0	0	0	0	0	0	0	0.666669	0	0	0	0	0	0	0	0	0	0	0	0	0	0
11	ASV11_Enterobacteriaceae_unclassified	0.360282	0	0	0	0	0	0	0	0	0	0	0	0	0	0	0	0	0	0	0.739055	0	0	0	0	0	0	0	0	0	1	0	0	-0.292497	0	0	0	0	0	0	0	0	0	0	0	0	0	0	0
12	ASV12_Moraxellaceae_Enhydrobacter	0	0	0	0	0	0	0	0	0	0	0	0	0	0	0	0	0	0	0	0	0	0	0	0	0	0	0	0	0	0	0	0	0	0	0	0	0	0	0	0	0	0	0	0	0	0	0.553035	0
13	ASV13_Leptotrichiaceae_unclassified	0	0.419003	0	0	0	0	0	0	0	0	0	0	0	0	0	0	0	0	0	0	0	0	0	0	0	0	0	0	0	0	0	0	0	0	0	0	0	0	0	0	0	0	0	0	0	0	0	0
14	ASV14_Moraxellaceae_unclassified	0	0	0	0	0.569464	0	0	0	0	0	0	0	0	0	0	0.278345	0	0	0	0	0	0	0	0	0	0	0.322983	0	0	0	0	0.718182	0	0	0	0	0	0	0	0	0	0	0	0	0	0	0	0
15	ASV15_Streptococcaceae_Streptococcus	0	0	0	0	0	-0.490842	0	0	0	0	0	0	0	0	0	0	0	0	0	0	0	0	0	0	0	0	0	0	0	0	0	0	0	0	0	0	0	0	0	0	0	0	0	0	0	0	0	0
16	ASV16_Psychrobacter_celer	0	0	0	0	0	0	0	0	0	0	0	0	0	0	0	0	0	0	0	0	0	0	0	0	0	0	0	0	0	0	0	0	0	0	0	0	0	0	0	0	0	0	0	0	0	0	0	-0.433962
17	ASV17_Pasteurellaceae_Mannheimia	0	0	0	0	0	0	0	0	0	0	-0.655943	0	0	0	0	0	0	0	0	0	0	0	0	0	0	0	0	0	0	0	0	0	0	0	0	0	0	0	0	0	0	0	0	0	0	0	0	0
18	ASV18_[Weeksellaceae]_unclassified	0	0	0	0	0	0	0	0	0	0	0	0	0	0	-0.468374	0	0	0	0	0	0	0	0	0	0	0	0	0	0	0	0	0	0	0	0	0	0	0	0	0	0	0	0	0	0	0	0	0
19	ASV19_Corynebacteriaceae_Corynebacterium	-0.411969	0	-0.279167	0	0	0	0	0	0	0	0	0	0	0	0	0	0	0.455639	0	0	0	0	0	0	0	0	-0.21745	0	0	-0.31324	0	0	-0.324987	0	0	0	0	0	0	0	0	0	-0.330744	0	0.327915	0	0	0
20	ASV20_Fusobacteriaceae_Fusobacterium	0	0	0	0	0	0	0	0	0	0	0	0	0	0	0	0	0	0	0	0	0	0	0	0	0	0	0	0	0	0	0	0	0.547253	0	0	0	0	0	0	0	0	0	0	0	0	0	0	0
21	ASV21_Moraxellaceae_Moraxella	-0.658647	0	0	0	0	0	0	0	0	0	-0.677391	0	0	0	0	0	0	0	0	0	0	0	0	0	0	0	0	0	0	0	0	0	0	0	0	0	0	0	0	0	0	0	0	0	0	0	0	0
23	ASV23_Moraxellaceae_unclassified	0	0	0	0	0	0	0	0	0	0	0	0	0	0	0	0	0	0	0	0	0	0	0	0	0	0	0	0	0	0	0	0	0	0	0	0	0	0	0	0	0	0	0	0	0	0	0	0
24	ASV24_Veillonellaceae_Phascolarctobacterium	0	0	0	0	0	0.256268	0	0	0	-0.506179	0	0	0	0	0.200301	0	0	0	0.267662	0	0	-0.524812	0	0	0	0	0	0	0	0	0	-0.587723	0	-0.466799	0	0	0	0	0	0	-0.639584	0	0	-0.477193	0	0	0	0
25	ASV25_[Weeksellaceae]_unclassified	0	0	0	0	0	0	0	0	0	0	0	0	0	0	0	0	0	0	0	0	0	0	0	0	0	0	0	0	0	0	0	0	0	0	0	0	0	0	0	0	0	0	0	0	0	0	0	0
26	ASV26_Vibrionales_unclassified	0	0	0	0	0	0	0	0	0	0	0	0	0	0	0	0	0	0	0	0	0	0	0	0	0	0.510718	0	0	0	0	0	0	0	0	0	0	0	0	0	0	0	0	0	0	0	0	0	0
27	ASV27_Vibrio_metschnikovii	0	0	0	0	0	0	0	0	0	0	0	0	0	0	0	0	0.541965	0	0	0	0	0	0	0	0	0.540152	0	0	0	0	0	0	0	0	0	0	0	0	0	0	0	0	0	0	0	0	0	0
28	ASV28_Mycoplasmataceae_Ureaplasma	0	0	0	0	0	-0.721212	0	0	-0.554945	0	0	0	0	0	0	0	0	0	0	0	0	0	0	0	0	0	0	0	0	0	0	0	0	0	0	0	0	0	0	0	0	0	0	0	0	0	0	0
30	ASV30_Flavobacteriaceae_unclassified	0	0	0.342501	0	0	0	0	-0.525287	0	-0.589766	0.246003	0	-0.443722	-0.699415	0.29701	0	0	0	0	0	0	0	0	0	0	-0.471956	0.365376	0	0	0	0	-0.507168	0	-0.65692	0	0	0	0	0	0	0	0	0.50715	0	0	0	0	0.290839
32	ASV32_Corynebacteriaceae_Corynebacterium	-0.412524	0	-0.514719	0	0	0.290434	0	0	0.23116	0	0	0	0	0	-0.241135	0	0	0	0	0	0	0	0	-0.496316	0	0	-0.500099	0	0	0	0	0	-0.33585	0	0	0	0	0	-0.469504	0	0	0	-0.39632	0	0.31985	0	0	0
34	ASV34_Bifidobacterium_pseudolongum	-0.292644	-0.301194	-0.282181	0	0	0.364575	0	0	0	0	0	0	0	0	0	0	0	0	0	0	0	0	0	0	0	0	-0.258729	0	0	0	0	0	0	0	0.715232	0	0	0	-0.516178	0	0	0	-0.257603	0	0.286432	0	0	0
35	ASV35_Carnobacteriaceae_unclassified	0	0	0	0	0	0	0	0	0	0	0	0	0	0	-0.431387	0	0	0	0	0	0	0	0	0	0	0	0	0	0	0	0	0	0	0	0	0	0	0	0	0	0	0	0	0	0	0.648485	0	0
36	ASV36_Chitinophagaceae_unclassified	0	0	0	0	0	0	0	0	0	0	0	0	0	0	0	0	0	0	0	0	0	0	0	0	0	0	0	0	0	0	0	0	0.375765	0	0	0	0	0	0	0	0	0	0	0	0	0	0	0
37	ASV37_Ruminococcaceae_unclassified	-0.291411	0	0	0	0	0.348501	0	0	0.240878	0	0	0	0	0	0	0	0	0	0	0	0	0	0	-0.60173	-0.68486	0	0	0	0	-0.369662	0	-0.46542	0	0	0	0	0	0	0	0	-0.403232	0	0	0	0.354856	0	0	0
38	ASV38_Moraxellaceae_Moraxella	0	0	0	0	0	0	0	0	0	0	0	0	0	0	0	0	0	0	0	0	0	0	0	0	0	0	0	0	0	0	0	0	0	0	0	0	0	0	0	0	0	0	0	0	0	0	0	0
39	ASV39_Corynebacteriaceae_Corynebacterium	0	0	0.432	0	0	0	0	0	-0.274074	0	0	0	0	0	0.41628	0	0	0	0	0	0	0	0	0	0	0	0.533421	0	0	-0.375077	0	0	0.391445	0	0	0	0	0	0	0	0	0	0	0	0	0	0	0
40	ASV40_[Weeksellaceae]_unclassified	0	0	0	0	0	0	0	0	0	0	0	0	0	0	0	0	0	0	0	0	0	0	0	0	0	0	0	0	0	0	0	0	0.637815	0	0	0	0	0	0	0	0	0	0	0	0	0	0	0
43	ASV43_Moraxellaceae_Moraxella	0	0	0	0	0	0	0	0	0	0	0	0	0	0	0	0	0	0	0	0	0	0	0	0	0	0	0	0	0	0	0	0	0	0	0	0	0	0	0	0	0	0	0	0	0	0	0.893621	0
44	ASV44_Moraxellaceae_Enhydrobacter	0	0	0	0	0	-0.769713	0	0	0	0	0.55846	0	0	0	0	0	0	0	0	0	0	0	0	0	0	0	0	0	0	0	0	0	0	0	0	0	0	0	0	0	0	0	0	0	0	0	0	0
45	ASV45_Bacteroidaceae_Bacteroides	0	0	0	0	0	0	0	0	0	0	0	0	0	0	0	0	0	0	0	0	0	0	0	0	0	0	0	0	0	0	0	0	0	0	0	0	0	0	0	0	0	0	0	0	0	0	0	0
46	ASV46_Corynebacteriaceae_Corynebacterium	0	-0.271589	0.334144	0	0	0	0	0	0	0	0	0	0	0	0.433531	0	0	0	0	0	0	0	0	0	0	0	0.441452	0	0	0	0	0	0	-0.460452	0	0	0	0	0	0	0	0	0	-0.660606	0	0	0	0
47	ASV47_Prevotella_copri	0	0	0.490861	0	0	-0.406232	0	0	0	0	0	0	0	0	0	0	0	0	0	0	0	0	0	0	0	0	0	0	0	0	0	0	0	0	0	0	0	0	0	0	0	0	0	0	0	0	0	0
50	ASV50_Psychrobacter_sanguinis	0	0	0.530343	0	0	0	0	0	-0.461237	-0.546682	0	0	0	0	0.264167	0	0	0	0	0	0	0	0	0	0	0	0.620663	0	0	0	0	0	0	0	0	0	0	0	0	0	0	0	0.325105	0	0	0	0	0
51	ASV51_Moraxellaceae_Acinetobacter	0	0	0	0	0	0	0	0	0	0	0	0	0	0	0	0	0	0	0	0	0	0	0	0	0	0	0	0	0	0	0	-0.633321	0	0	0	0	0	0	0	0	0	0	0	0	0.216567	0	0	0
53	ASV53_Neisseriaceae_unclassified	0	0	0	0	0	0	0	0	0	0	0	0	0	0	0	0	0	0	0	0	0	0	0	0	0	0	0	0	0	0	0	0	0	0	0	0	0	0	0	0	0	0	0	0	0	0	0	0
54	ASV54_Mycoplasmataceae_Mycoplasma	0.356104	0.307118	0	0	0	0	0	0	0	0	0	0	0	0	0	0	0	0	0	0.80303	0	0	0	0	0	0	0	0	0	0	0	0	0	0	0	0	0	-0.330226	0	0	0	0	0	-0.564286	0	0.70517	0	0
57	ASV57_Acinetobacter_lwoffii	0	-0.315743	0.487525	0	0	0	0	0	0	0	0	0	0	0	0.416174	0	0	0	0	-0.585969	0	0	0	0	0	0	0.643843	0	0	-0.475877	0	0	0	-0.490798	0	0	0	0	0	0	0	0	0	0	0	0	0	0
58	ASV58_Veillonellaceae_Megasphaera	0	0	0	0	0	0	0	0	0	0	0	0	0	0	0	0	0	0	0	0	0	0	0	0	0	0	0	0	0	0	0	0	0	0	0	0	0	0	0	0	0	0	0	0	0	0	0	0
60	ASV60_Planococcaceae_Solibacillus	-0.299289	0	-0.296129	0	0	0	0	0	0	0	0	0	0	-0.658757	0	-0.423309	0	0	0	0	0	0	0	0	0	0	-0.478297	0	0	0	0	0	0	0	-0.684848	0	0	0	0	0	0	0	0	0	0	0	0	0
63	ASV63_[Paraprevotellaceae]_YRC22	0	0	-0.564622	0	0	0	0	0	0	0	0	0	0	0	-0.505775	0	0	0	0	0	0	0	0	0	-0.573007	0	-0.53135	0	0	0	0	0	-0.304982	0	0	0	0	0	0	0	0	0	0	0.528257	0	0	0	0
64	ASV64_Ruminococcaceae_unclassified	0	0	0	0	0	0	0	0	0	0	0	0	0	0	0	0	0	0	0	0	0	0	0	0	0	0	0	0	0	0	0.788157	0	0	0	0	0	0	0	0	0	0	0	0	0	0	0	0	0
65	ASV65_Moraxellaceae_Acinetobacter	-0.297612	0	0	0	0	0.275296	0.554945	0	0	0	0.369459	0	0	-0.447302	0	-0.326114	0	0	0	0	0	0	0	0	0	0	-0.309587	0	0	0	0	0	0	0	0	0	0	0.46465	0	0	-0.569464	-0.554456	0	0	0	0	0	0
69	ASV69_SR1_unclassified	-0.44116	0	-0.560133	0	-0.488788	0	0	0	0.336633	0	0.256717	0	0	0	0	0	0	0	0	-0.532454	-0.46554	-0.529412	-0.619734	0	0	-0.447331	-0.527365	0	0	0	0	-0.67033	0	0	0	0	-0.598749	0.401799	0	0	0	0	-0.307996	0	0	-0.548704	0	0
70	ASV70_Clostridium_celatum	-0.220052	-0.259729	0	0	0	0.295666	0	0	0.260104	0	0	-0.525669	0	0	0	0	0	0	0.307563	0	0	0	0	0	0	0	-0.237184	0	0	-0.373808	0	-0.51397	0	0	0	0	0	0	0	0	0	0	0	0	0.421684	0	-0.665162	0
71	ASV71_[Weeksellaceae]_Weeksella	0	0	0.386044	0	0	-0.448581	0.783672	0	-0.299587	0	0	0	0	0	0.538236	0	0	0	0	0	0	0	0	0	0	0	0.54447	0	0	0	0	0	0.325944	0	0	0	0	0	0	0	0	0	0.339021	0	0	0	0	0
72	ASV72_Lactobacillaceae_Lactobacillus	0	0	0	0	0	0	0	0	-0.662571	0	-0.447548	0	0	0	0	0	0	0	0	0	0	0	0	0	0	0	0	0	0	0	0	0	0	0	0	0	0	0	0	0	0	0	0	0	-0.677381	0	0	-0.48927
73	ASV73_Ruminococcaceae_unclassified	0	0	0	0	-0.704071	0	0.779849	0	0	0	0	0	0	0	0	0	0	0	0	0	0	-0.721212	0	0.68294	0	0	0	0	0	0	0	0	0	0	0.806061	0	0	0	0	0	-0.716712	0	0	0	0	0	0	0.336593
74	ASV74_Prevotella_copri	0	0	0	0	0	-0.326296	0	0	-0.346953	0	0	0	0	0.550055	0	0.300826	0	0.923077	0	0	0	0	0	0	0	0	0.260351	0	0	0	0	0	0.51055	0	0	0	0	0	0	0	0	0	0	0	0	0	0	0
75	ASV75_Peptostreptococcaceae_unclassified	0	0	0	0	0	0	0	0	0.275521	0	0	0	0	0	0	0	0	0	0	0	0	0	0	0	0	0	0	0	0	0	0	0	0	0	0.577934	0	0	0	-0.610132	0	0	0	0	0	0.342512	0	0	0
76	ASV76_Carnobacteriaceae_Trichococcus	0.340375	0	0.673049	0	0	-0.356015	0	0	0	0	0	0	0	0	0.480512	0	0	0	0	0	-0.509219	0	0	0	0	0	0.652611	0	0	0	0	0	0.416493	0	0	0	0	0	0	0	0	0.699786	0.33133	0	-0.277731	0	0	0
77	ASV77_Mycoplasmataceae_Mycoplasma	0.46236	0	0	0	0	0	0	0	0	0	0	0	0	0	0	0	0	0	0	0	0	0	0	0	0	0	0	0	0	0	0	0	0	0	0	0	0	0	0	0	0	0	0	0	0	0	0	0
79	ASV79_[Weeksellaceae]_Wautersiella	0	0	-0.309614	-0.548408	-0.578367	0	0	-0.484393	0.38587	-0.525555	0.467663	-0.525386	0	0	0	-0.288811	0	0	0	0	0	0	0	0	0	0	-0.256176	0	0	0	0	0	0	0	-0.640982	0	0	0	0	0	0	0	0	0	0	0	0	0
81	ASV81_Chitinophagaceae_unclassified	0.352608	0	0	0	0	0	0	0	0	0	0	0	0	0	0	0	0	0	0	0	0	0	0	0	0	0	0	0	0	0	0	0	0.373889	0	0	0	0	0	0	0	0	0	0	0	0	0	0	0
82	ASV82_Streptococcus_luteciae	0	0	0	0	0	0	0	0	0	0	0	0	0	0	0	0	0	0	0	0	0	0	0	0	0	0	0	0	0	0	0	0	0	0	0	0	0	0	0	0	0	0	0	0	0	0	0	0
83	ASV83_Streptococcus_alactolyticus	0	0	0	0	0	0	0	0	0	0	0	0	0	0	0	0	0	0	0	0	0	0	0	0	0	0	0	0	0	0	0	0	0	0	0	0	0	0	0	0	0	0	0	0	0	0	0	0
84	ASV84_Halomonadaceae_Halomonas	0	0	0	0	0	0	0	0	0	0	0	0	0	0	0	0	0	0	0	0	0	0	0.627273	0	0	0	0	0	0	0	0	0	0	0	0	0	0	0	0	0	0	0.723861	0	0	0	0	0	0
85	ASV85_Methanobacteriaceae_Methanobrevibacter	0	0	0	0	0	0	-0.5	0	0	-0.442248	0	0	0	0	0	-0.258785	0	0	0.386716	0	0	0	0	0	0	0	0	0	0	0	0	0	0	0	0	0	0	0	0	0	0	0	0	0	0	0	0	0
87	ASV87_Prevotella_stercorea	0	0	0	0	0	0	0	0	0	0	0	0	0	0	0	0	0.802103	0	0	0	0	0	0	0	0	0	0	0	0	0	0	0	0	0	0	0	0	-0.550921	0	0	0	0	0	0	0	0	0.802435	0
88	ASV88_Planococcaceae_unclassified	0	0	-0.500018	0	0	0.412628	0	0	0.237909	0	0.319885	0	0	0	-0.239505	0	0	0	0	0	0	0	0	0	0	0	-0.31598	0	0	0	0	0	-0.434127	0	0	0	0	0.338788	-0.550984	0	0	0	0	0	0	0	0	0
90	ASV90_Aerococcaceae_unclassified	0	0	-0.292511	-0.58073	0	0	0	0	0.317361	0	0	0	0	0	0	0	0	0	0.30548	0	0	0	0	0	0	0	0	0	0	0	0	0	0	0	0	0	0	0	0	0	0	0	0	0	0.249083	0	-0.594555	0
95	ASV95_Prevotellaceae_Prevotella	0	0	0	0	0	0	0	0	0	0	-0.327655	0	0	0	0	0	0	0.554945	0	0.736264	0	0	0	0	0	0	0	0	0	0	0	0	0	0	0	0	0	0	0	-0.684848	-0.616232	0	0	0	0	0	0	0
99	ASV99_Ruminococcaceae_unclassified	0	0	0	0	0	0	0	0	0	0	-0.321889	0	0	0	0	0	0	0	0	0	0	0	0	0	0	0	0	0	0	0	0	0	0.390701	0	0	0	0	0	0	0	0	0	0	0	0	0	0	-0.3009
100	ASV100_Jeotgalicoccus_psychrophilus	0	0	1	0	0	-0.377095	0	0	-0.380651	0	-0.323205	0	0	0	0.384015	0	0	0	0	0	0	0	0	0	0	0	0.614004	0.669753	0	0	0	0	0.376884	0	0	0	0	0	0	0	0	0	0.317549	0	0	0	0	0
101	ASV101_Corynebacteriaceae_Corynebacterium	-0.319649	0	-0.377095	0	0	1	0	0	0.256153	0	0	0	0	0	0	-0.408552	0	0	0	-0.662267	0	0	0	0	0	0	0	0	0	0	0	0	-0.312665	0	0	0	-0.586813	0.335852	0	0	0	0	0	0	0	0	0	0
102	ASV102_[Weeksellaceae]_unclassified	0	0	-0.380651	0	0	0.256153	0	-0.619515	1	0	0.334863	0	0	0	0	0	0	0	0	0	0	0	0	0	0	0	-0.419657	0	0	0	0	0	-0.365128	0	0	0	-0.578658	0	-0.548189	0.596974	0	0	0	0	0	0	0	0
103	ASV103_Rhodobacteraceae_unclassified	0	0	-0.323205	0	-0.627907	0	0	0	0.334863	0	1	0	0	0	0	-0.236543	0	0	0	0	0	0	0	0	0	0	0	0	0	0	0	0	0	-0.499079	0	0	0	0.318174	0	0	0	0	0	0	0	-0.648352	0	0.225846
104	ASV104_Micrococcaceae_Arthrobacter	0	0	0.384015	0	-0.531266	0	0	0	0	0	0	0	0	0	1	0	0	0	0	0	0	-0.67033	0	0	0	0	0.534429	-0.53175	0	0	0	0	0.353253	-0.465562	0	0	0	0	0	0	0	0	0	0	0	-0.674725	0	0
105	ASV105_Olsenella_umbonata	0	0	0	0	0	-0.408552	0	0	0	0.717178	-0.236543	0	0.566593	0.5187	0	1	0.545924	0	0	0	0	0	0	0	0	0	0	0	0	0	0	0	0	0	0	0	0	0	0	0	0	0	0	0	0	0	0	0
106	ASV106_Pasteurellaceae_unclassified	0	0	0	0	0	0	0	0	0	0	0	0	0	0	0	0	0	0	1	0	0	0	0	0	0	0	0	0	0	0	0	0	0	0	0	0	-0.6655	0	0	0	0	0	0	0	0	0	0	0
109	ASV109_Carnobacteriaceae_Trichococcus	0	0	0.614004	0	0	0	0	0	-0.419657	0	0	0	0	0	0.534429	0	0	0	0	0	0	0	0	0	0	0	1	0	0	0	0	0	0.398748	0	0	0	0	0	0	0	0	0	0.425318	0	0	0	0	0
111	ASV111_Prevotellaceae_Prevotella	0.240085	0	0.376884	0	0	-0.312665	0	0	-0.365128	0	0	0	0	0	0.353253	0	0	0	0	0	0	0	0	0	0	0	0.398748	0	0.578022	-0.292497	0	0	1	0	0	0	0	0	0	0	0	0	0	0	0	0	0	0
113	ASV113_Corynebacterium_stationis	0	0	0	0	0	0.335852	0	0	0	0	0.318174	0	0	0	0	0	0	0	0	0	0	0	0	0	0	0	0	0	0	0	0	0	0	0	0	0	0	1	0	0	0	0	0	0.503682	0	0	0	0
115	ASV115_Moraxellaceae_Acinetobacter	0	0	0.317549	0	0	0	0	0	0	0	0	0.704029	0	-0.780488	0	0	0	0	0	0	-0.532454	0	0	0	0	0	0.425318	0	0	0	0	0	0	0	0	0	0	0	0	0	0	0	1	-0.711285	0	0	0	0
116	ASV116_Turicibacteraceae_Turicibacter	0	0	0	0	0	0	0	0	0	0	0	-0.489417	0	0	0	0	0	0	0	0	0	0	0	0	0	0	0	0	0	0	0	0	0	0	0	0	0	0	0	-0.6	0	0	0	0	1	0	0	0
117	ASV117_Alcaligenaceae_Oligella	0	0	0	0	-0.5227	0	0	0	0	0	0.225846	0	0	0	0	0	0	0	0	0	0	-0.567857	0	0	0	0	0	0	0	0	0	0	0	0	0	0	0.570588	0	0	0	0	0	0	0	0	0	0	1
118	ASV118_Staphylococcus_sciuri	0	0	-0.365517	0	0	0.261156	0	0	0.275735	-0.636364	0	0	0	0	0	0	-0.54599	0	0	0	0	0	-0.772727	0	0	0	-0.43599	0	0	0	-0.573727	-0.762238	-0.310759	0	0	0	0	0	0	0	0	0	0	0	0	0	-0.69051	0
119	ASV119_Comamonadaceae_Comamonas	0	0	-0.392401	0	0	0	0.58597	0	0	0	0.44133	0	0	0	0	-0.352312	-0.56701	0	0	0	0	0	0	0	0	-0.49887	0	0	0	0	0	0	-0.367031	0	0	0	0	0	0	0	0	0	0	0	0	0	0	0
121	ASV121_Veillonellaceae_Phascolarctobacterium	0	0	-0.543578	0	0	0	-0.469799	0	0	0	0	0	0	0	0	0	0	0	0	0	0	0	0	0	0	0	-0.342721	0	0	0	0	0	-0.265022	0	0	0	0	0	0	0	0	0	-0.471158	0	0	0	0	0
122	ASV122_Pseudomonadaceae_Pseudomonas	0	0	0	0	0	0	0	0	0	0	-0.284277	0	0	0	0.321782	0	0	0	0	0	0	0	0	0	0	0	0.378603	0	0	0	0	0	0	0	0	0	0	0	0	0	0	0	0	0	0	0	0	0
123	ASV123_Enterobacteriaceae_unclassified	0	0	0	0	0	0	0	0	-0.57576	0	-0.607217	0	0	0	0	0.552279	0	0	0	0	0	0	0	0	0	0	0	0	0	0	0	0	0	0	0	0	0	0	0	0	0	0	0	0	0	0	0	0
126	ASV126_[Paraprevotellaceae]_[Prevotella]	0	0	0	0	0	0	0	0	0	0	0	0	0	0	0	0	0	0	0	0	0	0	0	0	0	0	0	0	0	0	0	0	0.386165	0	0	0	-0.519092	0	0	0	0	0	0	0	0	0	0	0
129	ASV129_Clostridiaceae_unclassified	0	0	0	0	0	0	0	0	0	0	0	0	0	0	0	0	0	0	0	0	0	0	0	0	0	0	0	0	0	0	0	0	0	0	0	0	0	0	0	0	0	0	0	0	0	0	0	0
130	ASV130_Clostridiales_unclassified	0	0	0	0	0	0	-0.707874	0	0.279044	0	0	0	0	0	0	0	0	0	0	0	0	0	0	0	0	0	0	-0.697676	0	0	0	0	-0.301408	0	0	0	0	0	0.723522	0	0	0	0	0	0	0	0	0
131	ASV131_S24-7_unclassified	0	0	0	0	0	0	0	0	0	0.669003	0	0	0	0	0	0	0	0	-0.441809	0	0	0	0	0	0	0	0	0	0	0	0	0	0.333944	0	0	0	0	0	0	0	0.638301	0	0	0	0	0	0	-0.358202
133	ASV133_Veillonellaceae_vadinHB04	-0.303007	0	0	0	0	0	0	0	0	0	0	0	0	0	-0.366091	0	0	0	0	0	0	0	0	0	0	0	0	0	0	0	0	0	0	0	0	0	0	0	0	0	0	0	0	0	0	0	0	0
134	ASV134_Lactobacillaceae_Lactobacillus	0	0	0	0	0	0	0	0	0	0	0	0	0	0	0	0	0	0	0	0	0	0	0	0	0	0	0	0	0	0	0	0	0	0	0	0	0	0	0	0	0	0	0	0	0	0	0	0
135	ASV135_Comamonadaceae_Comamonas	0	0	0	0	0	0.280157	0	0	0	0	0	0	0	0	-0.427077	0	0	0	0	0	0	0	0	0	0	0	-0.418034	0	0	0	0	0	0	0	0	0	0	0.355813	0	0	0.844749	-0.545655	0	0	0	0	0	0
136	ASV136_Porphyromonadaceae_unclassified	0	0	0	0	0.587901	-0.319319	0	0	0	-0.524523	0	0	0	0	-0.240882	0	0	0	0	0	0	0	0	0	-0.493547	0	0	0	0	0	0	0	0	0	0	0	0	-0.379906	0	0	0	0	0	0	0	0	0	0
137	ASV137_Actinomycetaceae_N09	0	0	-0.286325	0	0.530782	0	0	0	0	0	0	0	-0.661538	0	0	0	0	0	0	0	0	0	0	0	0	0	-0.310002	0	0	0	0	-0.641645	-0.282436	0	0	0	0	0	0	0	0	0	0	0	0	0	0	-0.249769
138	ASV138_Pseudomonadaceae_Pseudomonas	0	0	-0.339268	0	0	0	0	0	0	0	0	0	-0.632143	-0.540611	0	0	0	0	0	0	0	0	0	0	0	0	-0.32623	0	0	0	0	0	-0.336388	0	0	0	0	0	0	0	0	0	0	0	0	0	0	0
140	ASV140_Pusillimonas_noertemannii	0	0	0	0	0	0.303995	0	0	0	0	0	0	0	0	0	0	0	0	0	0	0	0	0	0	0	0	-0.448288	0	0	0	0	0	-0.449392	0	0	0	0	0	0	0	0	0	0	0	0	0	0	0
141	ASV141_Prevotellaceae_Prevotella	0	0	0	0	0	0	0	0	-0.394182	0	-0.341824	0	0	0	0	0	0	0	0	0	0	0	0.587912	0	0	0	0.373357	0.761369	0	0	0	0	0.559479	0	0	0	0	0	0	0	0	0	0	0	0	0	0	0
144	ASV144_Arcobacter_cryaerophilus	0	0	0	0	0	0	0	0	0	0	0.273758	0	0	0	0	0	0	0	0	0	0	0	0	0	0	0	-0.293533	0	0	0	0	0	0	0	0	0	0	0	0	0	0	0	0	0	0	0	-0.604396	0
145	ASV145_Veillonellaceae_Anaerovibrio	0	0	0.423869	0	0	0	0	0	0	0	0	0	0	0	0.42294	0	0	0	0.644665	0	0	0	0	0	0	0	0	0	0	0	0	0	0	0	0	0	0	0	0	0	0	0	0.516564	0	0	0	0	0
152	ASV152_[Clostridium]_sordellii	0	0	0	0	0	0	0	0	0	0.692485	0	0	0	0	0	0	0	0	0	0	0	0	0	0	0.927273	0	0	0	0	0	0.734266	0.956219	0	0	0	0	0	0	0	0	0	0	0	0	0	-0.781818	0	0
154	ASV154_Rhizobiaceae_Agrobacterium	-0.362581	-0.51624	0	0	-0.576029	0	0	0	0.455506	0	0	-0.588025	0	0	0	0	0	0	0	0	0	0	0	0	0	0	0	0	0	0	0	0	-0.375285	0	0	0	0	0	0	0	0	0	0	0	0	0	0	0
156	ASV156_[Weeksellaceae]_Wautersiella	0	0	0	0	0	0	0	0	0	0	0	0	0	0	0	0	0	0	0	0	0	0	0	0	0	0	0	0	0	0	-0.699091	0	0	0	0	0	0	0	0	0	0	0	0	0	0	0	0	0
157	ASV157_Jonesiaceae_unclassified	0	0	-0.372339	0	0	0	0	0	0	0	0.35275	0	0	0	0	-0.327669	0	0	0	0	0	0	0	0	0	0	0	0	0	0	0	0	-0.330778	0	0	0	0	0	0	0	0	0	0	0	0	0	0	0
158	ASV158_Clostridiales_unclassified	0	0	-0.548532	0	0	0	-0.626374	0.666667	0	0	0	0	0	0.534091	0	0	0	0	0	0	0	0	0	0	-0.658495	0	-0.39181	0	0	-0.625342	-0.676008	0	0	0	0	0	0	0	0	0	-0.669706	0	-0.311708	0	0	0	0	0
159	ASV159_Dietziaceae_Dietzia	0	0	0	0.736364	0	0	0	0	0	0	0	0	0	0	0	0	0	0	0	0	0	0	0	0	0	0	0	0	0	0	0	0	0	0	0	0	0	0	0	0	0	0	0	0	0	0	0	0
161	ASV161_Lachnospiraceae_Butyrivibrio	0	-0.337501	0	0	-0.607979	0	0	0	0	0	0	-0.692308	0	0	0.282849	0	0.506438	0	0	0	0	0	0	0	0	0.552773	0	0	0	-0.358706	0	0	-0.383612	0.937063	0	0.760822	0	0	0	0	0	0	0	0	0.337393	0	0	0
165	ASV165_Sphingobacteriaceae_unclassified	0	0	0	0	-0.564401	0	0	0	0.394664	-0.603571	0.334647	0	0	0	0	0	0	0	0	0	0	0	0	0	0	0	0	0	0	0	0	0	-0.309801	0	0	0	0	0	0	0	0	0	0	0	0.264111	0	0	0
168	ASV168_Enterococcaceae_unclassified	0.30786	0	0.317157	0	0	0	0	0	-0.504635	0	0	0	0	0	0.260263	0	0	0	-0.567556	0	0	0	0	0	0	0	0.571596	0	0	0	0	0	0	0	0	0	0	0	0	0	0	0	0	0	0	0	0	0.292511
171	ASV171_[Mogibacteriaceae]_Mogibacterium	0	0	0	0	0	0	0	0	0	0	0	0.680854	0	0	0	0	0	0	0	0	0	0	0	0	0	0	0	0	0	0	0	0	0	0	0	0	0	0	0	0	0	0	0	0	-0.369211	0	0	0
172	ASV172_Prevotella_copri	0	0	0	0	0	0	0	0	0	0	0	0	0	0	0	0.340716	0	0	0	0	0.643357	0	0	0	0	0	0	0	0	0	0	0	0	0	0	0	0	0	0	0	0	0	0	0	0	0	0	0
173	ASV173_Idiomarinaceae_Idiomarina	0	0	0	0	0	-0.525284	0	0	0	0	0	0	0	0	0	0	0	0	0	0	0	0	0	0	0	0	0	0	0	0	0	0	0	0	0	0	0	0	0	0	0	0	0	0	0	0	0	0
175	ASV175_Clostridiaceae_Clostridium	-0.356994	0	-0.34926	0	0	0	0	0	0.405536	0	0	0	0	0	-0.412957	0	0	0	0	0	-0.62546	0	0	0	0	0	-0.457959	0	0	0	0	0	0	0	0	0	0	0	0	0	0	0	0	0	0	0	0	0
176	ASV176_Dietziaceae_Dietzia	0	0	0	0	0	-0.359321	0	0	-0.325126	0	0	0	0	0	0	0	0	0	-0.343949	0	0	0	0.592857	0	0	0	0	0	0	0	0	0	0	0	0	0	0.786346	0	0	-0.56044	0	0	0	0	0	0	0	0
179	ASV179_JG30-KF-CM45_unclassified	0	0	0	0	0	0	0	0	0	0	-0.370492	0	0	0	0	0	0	0	0	0	0	0	-0.672727	0	0	0	-0.42266	0	0	-0.382135	0	0	0	0	0	0	0	0	0	0	0	0	0	-0.660606	0.376943	0.596974	0	0.33529
183	ASV183_Intrasporangiaceae_unclassified	0	0	0	0	0	0	0	0	0	0	0	0	0	0.847383	0	0	0	0	0	-0.651982	0	0	0	0	0	0	0	0	0	0	0	0	0	0	0	0	0	0	0	0	0	0	0	0	0	0	0	0
184	ASV184_Moraxellaceae_Acinetobacter	0	0	0	0	0	0	0	0	-0.327549	0	0	0	0	0	0	0	0	0	0	0.636364	0	0	0	0	0	0	0	0	0	0	0	0	0	0	0	0	0	0.44283	0	0	0	-0.83891	0	0	0	0	0	0
185	ASV185_Prevotellaceae_Prevotella	0	0	0	0	0	-0.348993	0	0	0	0	0	0.733487	0	0	0	0	0	0	0	0	-0.427563	0	0	0	0	0	0	0	0	0	0	0	0.275876	0	0.7	-0.542857	0	-0.395031	0	0	0	0.758242	0	0	0	0	0	0
186	ASV186_Streptococcaceae_Streptococcus	0	0	0	0	-0.582418	0	0	0	0	0	0.501944	0	0	-0.501787	0	0	0	0	0	0	0	0	0	0	0	-0.619298	0	0	0	0	0	0	0	0	0	0	0	0	0	0	0	0	0	0	0	0	-0.552958	0
188	ASV188_Dietziaceae_Dietzia	0	0	-0.269781	0	0	0	0	0	0	0	0	0	0.540773	0	0	0	0	0	0	0	0	0	0	0	0	0	0	0	0	0	0	0	0	0	0	0	0	0	0	0	0	0	0	0	0.313284	-0.526885	0	0
189	ASV189_Aerococcaceae_Aerococcus	0	0	0	0	0	0	0	0	0	0.776224	0	0	0	0	0	0	0	0	0	0	0	0.745455	0	0	0	0	0	0	0	0	0.548792	0.640982	0	0	0	-0.690618	0	0	0	0.629371	0	0	0	0	0	0	0.648485	0
190	ASV190_Porphyromonadaceae_unclassified	0	0	0	0	0	0	0	0	0	0	0	0	0.619966	0	-0.243221	0	0	0	0	0	0	0	0	0	0	-0.509461	-0.299163	0.561056	0	0	0	0	0	0	0	0	0	0	0	0	0	-0.676471	0	0.470528	0	-0.614286	0	0
191	ASV191_[Paraprevotellaceae]_CF231	0	0	0	0	0	0	0	0	0	0	0	0	0	0	0	0	0	0	0	0	0	0	0	0	0	0	0	0	0	0	0	0	0	0	0	0	0	0	0	0	0	0	0	0	0	0	0	0
193	ASV193_Cryomorphaceae_Fluviicola	0	0	0	0	0	0	0	0	0	0	0.28891	0	0	0	0	-0.342906	0	0	0	0	0	0	-0.636364	0	0	0	0	0	0	0	0	0	0	0	0	0	-0.546429	0	0	0	0	0	0.309856	0	0	0	0	0
194	ASV194_Promicromonosporaceae_unclassified	0	0	0.431512	0	0	0	0	0	0	0	0	0	0	0	0	0	0	0	-0.336532	0	0	0	0	0	0	0	0.448623	0	0	0	0	0	0	0	0	0	0	0	0	0	0	0	0	0	0	0	0	0
196	ASV196_[Tissierellaceae]_Helcococcus	0	0	0	0	0	0.294726	0	0	0.415695	0	0	0	0	0	-0.272239	0	0	0	0	0	0	0	0	0	0	0	0	0	0	0	0	0	0	0	0	0	0	0	0	0	0	0	-0.35596	0	0.30523	0	0	0
200	ASV200_Lachnospiraceae_Butyrivibrio	0	0	0	0	-0.657343	0	-0.618182	0	0	0	0	0	0	0	0	0	0	0	0.347542	0	0	0	0	0	0	0	0	0	0	0	0	0	0	0	0	0	0	0	0	0	0	0	0	0	0	0	0	0
201	ASV201_Prevotellaceae_Prevotella	0	0	0	0	-0.645455	0	0	0	0	0	-0.321764	0	0	0	0	0	0	0.781818	0	0	0	0	0	0	0	0	0	0	0	0	0	0	0	0	0	0	0	-0.382425	0.603524	0	-0.552256	0	0	0	0	0	0	0
202	ASV202_Staphylococcus_equorum	0	0	0.502133	0	0	0	0	0	0	0	0	0	0	0	0	0	0	0	0	0	0	0	0	0	0	0	0	0	0	0	0	0	0	0	0	0	0	-0.535604	0	0	0	0	0	0	0.38104	0	0	0
205	ASV205_Verrucomicrobiaceae_Akkermansia	0	0	0	0	0	0	0	0	0	0	0	0	0	0	0	0	0	0	-0.514286	0	0	0	0	0	0	0	0	0	0	0	0	0	0	0	0	0	0	0	0	0	0	0	-0.56534	0	0	0	0	0
208	ASV208_Micrococcaceae_Arthrobacter	0	0	0	0	0	0	0	0	0	0	0	0	0	0	0.336758	0	0	0	0	-0.589813	0	0	0	0	0	0	0	0	0	0	0	0	0	0	0	0	0	0	0	0	0	0	0.298227	0	0	0	0	0
210	ASV210_Alcaligenaceae_unclassified	0	0	0	0	0	0	0	0	0	0	0	0	0	-0.516248	0	0	0	0	0	0	0	0	0	0	0	-0.763581	0	0	0	-0.561838	0	0	0	0	0	0	0	0	0	0	0	0	0	0	0.245936	0	0	0
212	ASV212_Prevotellaceae_Prevotella	0	0.327097	0	0	0	0	0	0	-0.435972	0	0	0	0	0	0	0	0	0	0	0.572058	0	0	0	0	0	0	0	0	0	0	0	0	0.376995	0	0	0	0	-0.467004	0	0	0	0.594406	0	0	0	0	0	0
213	ASV213_Methanobacteriaceae_Methanobrevibacter	0	0	0	0	0	0	0	0	0	0	0	0	0	0	0	0	0	0	0	0	0	0	0	0	0	0	0	0	0	-0.582353	0	0	0.608696	0	0	0	0	0	0	0	0	0	0	0	0	0	0	0
214	ASV214_Bacteroidaceae_5-7N15	0.412203	0	0	0	0	0	0	0	0	-0.545655	-0.39585	0	0	0	0	0	-0.648352	0	0	0	0	0	0	0	0	0	0	0	0	0	0	0	0.376494	0	0	0	0	0	0	0	0	0	0	0	0	0	0	0
215	ASV215_Phyllobacteriaceae_unclassified	-0.590987	0	0	0	-0.857143	0.463242	0	0	0	0	0	-0.574966	0	0	0	0	0	0	0	0	0	-0.661538	0	0	0	-0.657266	0	-0.746061	0	0	0	0	0	0	0	0	0	0	0	0	0	0	0	0	0	0	0	0
217	ASV217_Mycoplasmataceae_Mycoplasma	0	0	0	0	0	0	0	0	0	0	0	0	0	0	-0.650453	0	0	0	0	0	0	0	0	0	0	0	0	0	0	0	0	0	0	0	0	0	0	0	0	0	0	0	0	0	0	0	0	0
218	ASV218_Porphyromonadaceae_unclassified	0	0	0	0.587075	0	0	0	0	0	0	0	-0.846154	0	0.625571	0	0	0	0	0	0	0	0	0.769697	0	0.613481	0	0	0	0	0	0	0	0	0	0	0	0	0	0	-0.629371	0	0	0	0	0	0	0	0
220	ASV220_Prevotella_copri	0	0	0	0.572058	0	0	0	0	0	0	0	0	0	0	0	0	0	0	0	0	0	0	0	0	0	0	0	0	0	0	0	0	0	0	0	-0.672727	0	0	0	0	0	0	0	0.578022	-0.327273	0	0	0
221	ASV221_Cryomorphaceae_Fluviicola	0	0	0	0	-0.681818	0	0	0	0	0	0	0	0	0	0	0	0	0	0	0	0	-0.654545	0	0	0	0	-0.409069	0	0	0	0	0	0	0	0	0	0	0	0	0	0	0	0	0	0	0	0	0
222	ASV222_Phyllobacteriaceae_unclassified	-0.377663	-0.384622	0	0	0	0	0	0	0.35078	0	0.375111	0	0	0	0	-0.30155	0	0	0.381637	0	0	0	0	0	0	0	0	0	-0.687929	0	0	0	-0.283251	0	0	0	0	0	0	0	0	0	0	0	0	0	0	0
224	ASV224_Alcaligenaceae_Oligella	0	0	0	0	0	0	0	0	0	0	0	0	0	0	0	0.335289	0	0	0	0	0	0	0	0	0	0	-0.428181	0	0	0	0	0	0	0	0	0	0	0	0	0	0	0	-0.520876	0	0	0	0	0
225	ASV225_[Acidaminobacteraceae]_Guggenheimella	0	0	0	0.500517	0.622086	0	0	0	0	0	0	0	0	0	-0.345017	0	0	0	0	0	0	0	0	0	0	0	-0.295572	0	0	0	0	0	-0.271389	-0.632222	0	0	0	0	0	0	0	0	0	0	0	0	0	-0.326565
228	ASV228_Lachnospiraceae_[Ruminococcus]	0	0	0	0	0	0	0	0	0	0	0	0	0	0	0	0	0	0	0	0	0	0	0	0	0	0	0	0	0	0	0	0	0	0	0	0	0	0	0	0	0	0	0	0	0	0	0	0
231	ASV231_Prevotella_copri	0	0	0	0	0	0	0	0	0	0	-0.28754	0	0	0	0	0.252405	0	0	0	0.61663	0	0	0	0	0	0	0	0	0	0	0	0	0.343047	0	0	0	0	0	0	0	0	0	0	0	0	0.733333	0	0
232	ASV232_Coriobacteriaceae_unclassified	0	0	0	0	0	0	0	0	0	0	0	0	0	0	0	0	0	0	0	0.902098	0	0	0	0	0	0	0	0	0	0.469411	0	0	0	0	0	0	0	0	0	0	0	0	0	0	0	0	0	0
236	ASV236_Alteromonadaceae_Marinobacter	0.498164	0	0	0	0	0	0	0	0	0	0	0	0	0	0	0	0	0	0	0	0	0	0	0	0	0	0	0	0	0	0	0	0	0	0	0	0.963636	0	0	0	0	0	0	0	0	0	0	0.436983
237	ASV237_Bacteroidaceae_unclassified	0	0	0	0	0.877242	0	0	0	0	0	0	0	0	0	-0.37678	0	0	0	0	0	0	0	0.709091	0	0	0	0	0	0	0	0	0	0	0	0	0	0	0	0	0	0	0	0	0	0	0	0	0
238	ASV238_Faecalibacterium_prausnitzii	0	0	0	0	0	0	0	0	0	0	0	0	0	0	0	0	0	0	0	0	0	0	0	0	0	0	0	0	0	0	0	0	0	0	0	0	0	0.633054	0	0	0	0	0	0	0	0	0	0
239	ASV239_Bifidobacteriaceae_Bifidobacterium	0	0	-0.303403	0	0	0	0	0	0	0	0	0	0	0	0	0	0	0.981818	0	0	0	0	0	0	0	0	0	0	0	0	0.804196	0	0	0.601399	0	0	0	0	0	0	0.565459	0	0	0	0	0	0	0
243	ASV243_Flavobacteriaceae_unclassified	0	0	0	0	0	0	0	0	0	0	0	0	0	0	0	0	0	0	0	0	0	0	0	0	0	-0.516956	0	0	0	0	0	0	0	0	0	0	0	0	0	0	0	0	0	0	0	0	0	0
247	ASV247_Brevibacteriaceae_Brevibacterium	0	0	0	0	0	0	0	0	0	0	0	0	0	0	0	0	0	0	0	0	0.5705	0	0.671329	0	0	0	0	0	0	0	0.541254	0	0	0.626971	0	0	0	0	0	0	0	0	0	0	0	0	0	0
248	ASV248_Porphyromonadaceae_unclassified	0	0	0	0	0	0	0	0	0	0	0	0	0	0	0	0	0	0	0	0	0	0	0	0	0	0	0	0	0	0	-0.561674	0	0	0	0	0	0	0	0	0	0	0	0	0	0	0	0	0.360957
249	ASV249_Succinivibrionaceae_Succinivibrio	0	0	0	0	0	-0.503106	0	0	0	0	0	0	0	0	0.332784	0	0	0	0	0	0	0	0	-0.605898	0	0	0	0	0	0	0	0	0.33995	0	0	0	0	0	0	0	0	0	0	0	-0.566534	0	0	0
250	ASV250_Prevotellaceae_Prevotella	0	0	0.297507	0	0	0	0	0	-0.335967	-0.731868	0	0	0	0	0	0	0	0	0	0	0	0	0	0	0	0	0	0	0	0	0	-0.649781	0.334334	0	0	0	0	0	0	0	0	0	0	0	-0.299381	0	0	0
253	ASV253_Pirellulaceae_unclassified	-0.381005	0	0	0.697041	0	0	0.728931	0	0	0	0	0	0	0	0	0	0	0	0	0	0	0.589286	0	0	0	0	0	0	0	0	0	0	0	0	0	0	0	0	0	0	0	0	0	0	0	0	0	0
254	ASV254_Corynebacteriaceae_Corynebacterium	0	0	0	0	0	0	0	0	0	0	0	0	0	0	0	0	0	0	0	0	0	0	0	0	0	0	0	0	0	0	0	0	-0.431261	0	0	0	0	0	0	0	0.618182	0	0	0.727273	0	0	0	0
255	ASV255_Bacteroidales_unclassified	0	0	0	0	0	0	0	0	0	0	0	0	-0.577818	0	0	0	0	0	0	0	0	0	0	0	0	0	0	0	0	0	0	0	0	0	0	0	0.591945	0	0	0	0	0.886166	0	0	0	0	0	0
256	ASV256_Jonesiaceae_Jonesia	0.323227	0.437638	0	0	0	0	0	0	0	0	0	0	0	0	0	0	0	0	0	0	0	0	0	0	0	0	0	0	0	0	0.607306	0	0.305089	0	0	0	0	0	0	0	0	0	0	0	0	0	0.745455	0
258	ASV258_Comamonadaceae_unclassified	0	0	0	0	0	0.322052	0	0	0	0	0	-0.863636	0	-0.552761	-0.303869	0	0	0	0	0	0	0	0	0	0	0	0	0	0	0	0	0	-0.625441	0	0	0	0	0	0	0	0	-0.669753	0	0	0	0	0	0
259	ASV259_Staphylococcaceae_Jeotgalicoccus	0	0	0	0	-0.69697	0	0	-0.620879	0	0	0	-0.648485	0	0	0	0	0	0	0	0	0	0	0	0	0	0	-0.382332	0	0	0	0	0	0	0	0	0	0	0	0	0	0	0	0	0	0	0	0	0
262	ASV262_Spirochaetaceae_Treponema	0	0	0	0	0	0	0	0	-0.395043	0	0	0	0	0	0	0	0	0	0	0	0	0	0	0	0	0	0	0	0	0	0	0	0	0	0	0	0	0	0	0	0.656491	0.875384	0	0	0	0	0	-0.458611
266	ASV266_Ruminococcaceae_unclassified	0	0	0	0	0	0	0	0	0	0	0	0	0	0	0	0	0	0	0	0	0	0	0	0	0	0	0	0	0	0	0	0	0	0	0	0	0	0	0	0	0	0	0	0	0	0	0	0
268	ASV268_Peptostreptococcaceae_unclassified	0	0.526547	0	0	0	0	0	0	0	0	0	0	0	0	0	0	0	0	0	0.818182	0	0	0	0	0	0	0	0	0	0	0	0	0	0	0	0	0	0	0	0	0	0	0	0	0	0	0	0
269	ASV269_Prevotellaceae_Prevotella	0	0	0.394344	0	0	0	0	0	0	0	0	0	0	0	0	0	0	0	0	0	0	0	0	0	0	0	0.345241	0	0	0	0	0	0.37788	0	0	0	0	0	0	0	0	0	0	0	0	0	0	0
270	ASV270_[Paraprevotellaceae]_CF231	0	0	0	0	0	0	0	0	0	0	-0.386989	0	0	0	0	0	0	0	0	0	0	0	0	0	0	0.945055	0	0	0	0	0	0	0.38582	0	0	0	0	-0.571926	0	0	0	0	0	0	0	0	0	0
274	ASV274_Spirochaetaceae_Treponema	0	0	0	0	0	0	0	0	0	0	0	0	0	0	0	0	0	0	0	0	0	0	0	0	0	0	0	0	0	0	0	0	0	0	0	0	0.776224	0	0	0	0	0	0	0	0	0	0	0
277	ASV277_[Paraprevotellaceae]_[Prevotella]	0.282422	0	0.342029	0	0	0	0	0	0	0	0	0	0	0	0.367244	0.362642	0	0	0.518138	0	0	0	0	0	0	0	0.32203	0	0	0.400345	0	0	0.536734	0	0	0	0	0	0	0	0	0.697024	0	0	0	0	0	0
281	ASV281_Bacillales_unclassified	0	0	0	0	0	0	0	0	0	0	0	0	0	0	0	0	0	0	0	0	0	0	0	0	0	0	-0.594165	0	0	0	0	0	0	0	0	0	0	0	0	0	0	0	0	0	0	0	0	0
287	ASV287_Prevotellaceae_Prevotella	0	0	0	0	0	0	0	0	0	0	0	0	0	0	0	0.451212	0	0	0	0	0	0	0	-0.781818	0	0	0	0	0	0	0	0	0.463606	0	0	0	0	0	0	0	0	0	0	0	0	0	0	0
290	ASV290_Staphylococcaceae_Jeotgalicoccus	0	0	0	0	0	0	0	0	0	0	0	0	0	0	0	0	0	0	0	0	0	0	-0.636364	0	0	0	0	0	0	0	0	0	0	0	0	0	0	0	0	0	0	0	0	0	0	0	0	0
291	ASV291_Porphyromonadaceae_unclassified	0	0	0	0	0	0	0	0	0	0	0	0	0	0	0	0	0	0	0	0	0	0	0	0	0	0	0	0	0	0	0	0	0	0	0	0	0	0	0	0	0	0	0	0	-0.395339	0	0	0
292	ASV292_Clostridiales_unclassified	0	0	0	0	0	0	-0.93007	0	0	0	0	0	0	0	-0.318088	0	0	0	0	0.609461	0	0	0	0	0	0	-0.403429	-0.534066	0	0	0	0	0	0	0	0	0	0	0	0	0	0	-0.421918	0	0	0	0	0
295	ASV295_Roseburia_faecis	0	0	0	0	0	0	0	0	0	0	-0.596962	0	0	0	0	0	0	0	0	0	0	0	0	0	0	0	0	0	0	0	0	0	0	0	0	0	0	0	0	0	0	0	0	0	0	0	0	0
296	ASV296_Micrococcaceae_unclassified	0	0	0	0	0	0	0	0	0	0	0	0	0	0	0	0	0	0	0	0	0	0	0	0	0	0	0	0	0	0	0	0	0	0.601399	0	0	0	0	0	0	0.582418	0	0	0	0	0	0	0
297	ASV297_Prevotellaceae_Prevotella	0	0	0	0	0	0	0	0	-0.443475	0	0	0	0	0	0	0	0	0	0	0	0	0	0	0	0	0	0	0	0	0	0	0	0	0	0	0	0	0.553752	0	0	0	0	0	0	0	0	0	0
298	ASV298_Verrucomicrobiaceae_unclassified	0	0	0	0	0	0	0.79021	0	0	0	0	0	0	0	0	0	0	0	0	0	0	0	0	0	0.672727	0	0	0	0	0	0	0.863226	0	0	0	0	0	0	0	0	0	0	0	0.538462	0	0	0	0
302	ASV302_Alteromonadaceae_Cellvibrio	0	0	0	0	0	0	0	0	0.288968	0	0.266568	0	-0.58597	0	0	0	0	0	0	1	0	0	0	0	0	0	0	-0.927273	0	0	0	0	-0.426643	0	0	0	0	0	0	0.612961	0	0	0	0	0	0	0	0
305	ASV305_Verrucomicrobiaceae_Akkermansia	0	0	0	0	0	0	0	0	0	0	0	0	0	0	0	0	0	0	0	0	0	0	0	0	0	0	0	0	0	0.626994	0	0	0	0	0	0	0	0	0	0	0	0	0	0	0	0	0	0
311	ASV311_[Mogibacteriaceae]_Mogibacterium	0	0	0	0	0	0	0	0	0	0	0	0	0	0	-0.525555	0	0	0	0	0	0	0	0	0	0	0	0	0	0	0	0	0	0	0	0	0	0	0	0	0	0	0	0	0	-0.474174	0	0	0
312	ASV312_Clostridiales_unclassified	0	0	0	0	0	0	0	0	0	0	0	0	0	0	0	0	0	0	-0.440883	0	0	0	0	0	0	0	-0.396891	0	0	0	0	0	0	0	0	0	0	0	0	0	0	0	-0.518589	0	0	0	0	0
321	ASV321_Corynebacteriaceae_Corynebacterium	0	0	0	0	0	0	0	0	0	0	0	0	0	0	0	0	0	0	0	0	0	0	0	0	0	0	0	0	0	0	0	0	0	0	0	0	0	0	0	0	0	0	0	0	0	0	0	0
323	ASV323_Veillonellaceae_Phascolarctobacterium	0	0	0	0	0	0	0	0	0	0	0	0	0	0	0	0	0	0	0	0	0	0	0	0	0	0	0	0	0	0	0	0	0	0	0	0	0	0	0	0	0	0	0	0	0	0	0	0
324	ASV324_Intrasporangiaceae_Serinicoccus	0	0	0	0	0	0	0	0	0	0	0	0	0	0	0	0	0	0	0	0	0	0	0	0	0	0	0	0	0	0	0	0	0	0	0	0	0	0	0	0	0	0	0	0	0	0	0	0
325	ASV325_Pseudoclavibacter_bifida	0.340631	0	0.401822	0	0	0	0	0	0	0	0	0	0	0	0	0	0	0	0	0	0	0	0	0	0	0	0.34945	0	0	0	0	0	0	0	0	0	0	0	0	0	0	0	0	0.804196	0	0	0	0
326	ASV326_Clostridiales_unclassified	0	0	0	0	0	0	0	0	0	0	0	0	0	0	-0.558596	0	0	0	0.684211	0	0	0	0	0	0	0	0	0	0	0	0	0	0	0	0	0	0	0	0	0	0	0	0	0	0	0	0	-0.61332
327	ASV327_Fibrobacter_succinogenes	0	0	0	0	0	0	0	0	0	0	0	0	0	0	0	0	0	0	0	0	0	0	0	0	0	0	0	0	0	0	0	0	0	0	0	0	0	0	0	0	0	0	0	0	0	0	0	-0.451292
330	ASV330_[Weeksellaceae]_Wautersiella	0.322384	0	0	0	0	0	0	0	-0.614565	0	-0.367796	0	0	0	0	0	0	0	0	0	0	0	0	0	0	0	0.381349	0	0	0	0	0	0	0.490997	0	0	0	0	0	0	0.739274	0	0	0	0	0	0	0
331	ASV331_JG30-KF-CM45_unclassified	-0.482818	0	0	0	0	0	0	0	0	0	0	0	0	0	0	0	0	0	0	0	0	0	0	0	0	0	0	0	0	0	0	0	0	0	0	0	0	0	0	0	0	0	0	0	0	0	0	0
336	ASV336_Xanthomonadaceae_Stenotrophomonas	0	0	0	0	0	0	0	0	0	0	0.404816	0	0	0	0	0	0	0	0	0	0	0	0	0	0	0	0	0	0	0.512837	0	0	0	0	0	0	0	0	0	0	0	0	0	0	0	0	0	0
338	ASV338_[Weeksellaceae]_unclassified	0	0	0	0	0	-0.370172	0	0	0	0	0.296689	0	0	0	0	0	0	0	0	0	0	0	0	0	0	0	0	0	0	0	0	0	0	0	0	0	0	0	0	0	0	0	0	0	0	0	0	0.394022
339	ASV339_Bacteroidaceae_5-7N15	0	0	0	0	0	0	0	0	0	0	0	0	0	0	0	0	0	0	0	0	0	0	0	0	0	0	0	0	0	0	0	0	0	0	0	0	0	-0.6	0	0	0	0	0	0	0	0	0	0
343	ASV343_Bifidobacteriaceae_unclassified	0	0	0	0	0	0	0	0	0	0	0	0	0	0	0	0	0	0	0	0	0	0	0	0	0	0	0	0	0	0	0	0	0	0	0	0	0	0	0	0	0	0	0	0	0	0	0	0.542319
346	ASV346_Mycoplasmataceae_Mycoplasma	0	0	0	0	0	0	0	0	0	0	0	0	0	0	0	0	0	0	0	0	0	0	0	0	0	0	0	0	0	0	0	0	0	0	0	0	0	0	0	0	0	0	0	0	0	0	0	0
352	ASV352_Phyllobacteriaceae_Aminobacter	0	0	0	0.703542	0.660782	0	0	0	0	0	0	0	0	0	0	0	0	0	0	0	0	0	0	0	0	0	-0.340723	0	0	0	0	0	0	0	0	0	0	0	0	-0.672727	0	0	0	0	0.289102	0	0	0
353	ASV353_Dietziaceae_Dietzia	0	0	0	0.612281	0	0	0	0	0	0	-0.29804	0	0	0.734526	0	0.534553	0.963415	0	0	0	0.72028	0.632222	0	0	0	0.735537	0	0	0	0	0	0	0	0	0	0	0	0	0	0	0	0	0	0	0	0	0	0
354	ASV354_Moraxellaceae_Acinetobacter	0.485981	0	0	0	0	0	0	0	-0.712193	0	0	0	0	0	0	0	0	0	0	0	0	0	0	0	0	0	0.472134	0	0	0	0	0	0	0	0	0	0	0	0	0	0	0	0	0	0	0	0	0
356	ASV356_Clostridiales_unclassified	0	0	0	0	0	0	0	0	0	0	0	0	0.745455	0	0	0	0	0	0	0	0	-0.629987	0	0	0	0	0	0	0	0	0	0	0	0	0	0	0	0	0	0	0	0	-0.432877	0	0	0	0	0
357	ASV357_Coriobacteriaceae_unclassified	0	0	0	0	0.546256	-0.37159	0	0	0	0	-0.569536	0	0	0	0	0.47677	0	0	0	0	0	0	0	0	0	0	-0.443137	0	0	0	0	0	0	0	0	0	0	-0.534758	0	0	0	0	0	0	0	0	0	0
358	ASV358_Clostridiaceae_Clostridium	0	0	-0.469628	0	0	0	0	0	0	0	0	0	0	0.774478	0	0.319183	0	0	0	0	0	0	0	0	0	0	-0.447417	0	0	0	0	0	0	0	0	0	0	0	0	0	0	0	-0.556441	0	0	0	0	0
360	ASV360_Dermabacteraceae_Brachybacterium	0	0	0	0	0	0	0	0	0	0	0	0	0	0	0	0	0	0	0	0	0	0	0	0	0	0	0	0	0	0	0	0	0	0	0	0	0	0	0	0	0	0	0	0	0	0	0	0
361	ASV361_Veillonellaceae_Anaerovibrio	0	0	0.360197	0	0	0	0	0	0	0.669706	0	0	0.866667	0	0	0.624863	0.571078	0	0	0	0	0	0.9	0	0	0.730769	0	0	0	0	0	0.802103	0	0	0	0	0	0	0	0	0	0	0	0	0	0	0	0
362	ASV362_Chitinophagaceae_unclassified	0	0	0	-0.72028	0	0	0	0	0	0	0	0	0	-0.462621	0	0	0	0	0	0	0	0	0	0	0	0	0	0	0	0	0	0	0	0	0	0	0	0	0	0	0	0	0	0	0	0	0	0
363	ASV363_Bacteroidaceae_Bacteroides	0	0	0	0	0	0	0	0	0	0	0	0	0	0.902098	0	0	0	0	0	0	0	0	0	0	0	0	0	0	0	0	-0.609091	0	0	0	0	0	0	-0.389364	0	0	0	0	0	0	0	0	0	0
365	ASV365_Nocardioidaceae_unclassified	0	0	0	0	0	0	0	0	0	0	0	0	0	0	-0.321758	0.348638	0	0	0.476992	0.58494	0.769934	0	0	0	0	0	0	0	0	0	0	0	0	0	0	0	0	0	0	0	0	0	0	0	0	0	0	-0.375855
368	ASV368_Corynebacteriaceae_Corynebacterium	0	0	0	0	0	0	0	0	0	0	0	0	0	0	0	0	0	0	0	0	0	0	0	0	0	0	0	0	0	0	0	0	0	0	0	0	0	0	0	0	0	0	0	0	0	0	0	0
372	ASV372_Proteocatella_sphenisci	0	0	0	0	0	0	0	0.781818	0	0	0	0	0	0	0	0	0	0	0	0	0	0	0.645455	0	-0.674003	0	-0.327055	0	0	0	0	0	0	0	0	0	0	0	0	0	0	0	0	0	0	0	0	0
373	ASV373_Sphingobacteriaceae_unclassified	0	0	0	0	0	0	0	0	0	0	0.282417	0	0	0	0	0	-0.550811	0	0	0	0	0	0	0	0	0	-0.37031	0	0	0	-0.627343	0	0	0	0	0	0	0	0	0	0	0	0	0	0	0	0	0.31147
374	ASV374_Rhizobiaceae_Agrobacterium	0	0	0	0	0	0	0	0	0	0	0	0	0	0	0	-0.5129	0	0	0	0	0	0	0	0	0	0	0	0	0	0	0	0	0	0	0	0	0	0	0	0	0	0	0	0	0	0	0	0
375	ASV375_[Chromatiaceae]_Alishewanella	0	0	0	0	0	0	0	0	0	0	0	0	0	0	0	0	0	0	0	0	0	0	0	0	0	0	0	0	0	0	0	0	0	0	0	0	0	0	0	0	0	0	0	0	0	0	0	0
376	ASV376_Mycoplasmataceae_Mycoplasma	0	0	0	0	0	0	0	0	0	0	0	0	0	0	0	0	0	0	0	0	0	0	0	0	0	0	-0.602154	0	0	0	0	0	0	0	0	0	0	0	0	0	0	0	0	0	0	0	0	0
377	ASV377_Methanobacteriaceae_Methanobrevibacter	0	0	0	0	0	0	0	0	0	0	0	0	0	0	0	0.751223	0	0	0	0	0.680854	0	0	0	0	0	0	0	0	0	0	0	0	0	0	0	0	0	0	0	0	0	0	0	0	0	0	0
380	ASV380_[Weeksellaceae]_unclassified	0	0	0	0	0	0	0	0	0	0	0	0	0	0	0	0	0	0	0	0	0	0	0	0	0	0	0	0	0	0	0	0	0	0	0	0	0	0	0	0	0	0	0	-0.629371	0	0.605061	0	0
381	ASV381_Leuconostocaceae_Weissella	0	-0.417011	0	0	0	0	0	0	0	0	0	0	0	0	0	0	0	0	0	0	0	0.660606	0	0	0	0	0	0	0	0	0	0	0	0	0	0	0	0	0	0.778119	0	0	0	0.629371	-0.302943	0	0	0
387	ASV387_Flavobacteriaceae_unclassified	0	0	0	0	0.677193	0	0	0	0	0	0	0	0	0	0	0.318592	0	0	0	0	0	0	0	0	0	0	0	0	0	0	0	0	0	0	0	0	0	0	0	0	0	0	0	0	0	0	0	0
388	ASV388_Lachnospiraceae_Butyrivibrio	0	0	0	0	0	0	0	0	-0.488417	0.740659	0	0	0	0	0	0	0	0	0	0	0	0	0	0	0	0	0	0	0	0	0	0	0	0	0	0	0	0	0	0	0	0	0	0	0	0	0	0
389	ASV389_[Tissierellaceae]_Gallicola	0	0	0	0	0	0	0	0.806061	0	0.592857	0	0	0.713775	0	-0.346998	0	0	0	0	0	0.589571	0	0	0	0	0	0	0	0	0	0	0.752747	0	0.824176	0	0	0	0	0	0	0	0	-0.443693	0	0.316598	0	0	0
390	ASV390_Chitinophagaceae_unclassified	0	0	0	0	0	0	0	0	0	0	-0.449828	0.632222	0	0	0	0	0	0	0	0	0.618182	0	0	0	0	0.642857	0	0	0	0	0	0	0	0	0	0	0	-0.479132	0	0	0	0	0.530658	0	0	0	0	0
394	ASV394_Lachnospiraceae_Blautia	0	0	0	0	0	0	0	0	0	0	0	0	0	0	0	0	0	0	0	0	0	0	0	0	0	0	0	0	0	0	0	0	0.371636	0	0	0	0	0	0	0	0	0	0	0	0	0	0	0
399	ASV399_Corynebacteriaceae_Corynebacterium	0	0	0	0	0	0	0	0	0	0	0	0	0	0	0	0	0	0	0	0	0	0	0	0	0	0	0	0	0	0	0	0	0	0	0	0	0	0	0	0	0	0	0.492949	0	0	0	0	0
400	ASV400_GMD14H09_unclassified	0	0	0	0	0	0	0	0	0	0	0	0	0	0	0	0	-0.790277	0	0	0	0	0	0	0.640982	0	0	0	0	0	0	-0.612948	0	0	0	0	0	0	0	0	0	0	0	0	0	0	0	0	0
401	ASV401_Brucellaceae_Ochrobactrum	0	-0.671329	0	0	0	0	0	0	0	0	0	0	0	0	0	0	0	0	0	0	0	0	0	0	0	0	0	0	0	0.622378	0	0	0	0	0	0	0	0	0	0	0	0	0	0	0	0	0	0
403	ASV403_[Tissierellaceae]_Tissierella_Soehngenia	0	0	0	0	0.618182	0	0	0	0	0	0	0	0	0	0	0	0	0	0	0	0.571429	0	0	0	0	0	0	0	0	0	0	0	0	0	0	0	0	0	0.899543	0	0	0	0	0	0	0	0	0
404	ASV404_Desulfovibrionaceae_Desulfovibrio	0	0	0	0	0	0	0	0.624863	0	0	0	0	0	0	0	0.459507	0	0	0	0	0	0	0	0	0	0	0	0	0	0	0	0	0	0	0	0	0	0	0	0	0	0	0	0	0	0	0	-0.450998
407	ASV407_[Paraprevotellaceae]_YRC22	0	0	0	0	0	0	0	0	0	0	0	0	0	0	0	0	0	0	0	0	0	0	0	0	0	0	0	0	0	0	0	0	0	0	0	0	0	0	0	0	0	0	0	0	0	0	0	0
409	ASV409_Clostridiaceae_Proteiniclasticum	0	0	0	0	0	0.343644	0	0	0	0	0	0	0	0	0	0	0	0	0	0	0	0	0	0	0	0	0	0	0	0	0	0	0	0	0	0	0	0.435538	0	0	0	0	0	0	0	0	0	0
413	ASV413_Clostridiales_unclassified	0	0	-0.402158	0	0	0	0	0	0	0	0	0	0	0	0	0	0	0	-0.602338	0	0	0	0	0	0	0	0	0	0	0	0	0	0	0	0	0	0	0	0	0	0	0	0	0	-0.430776	0	0	0
415	ASV415_Intrasporangiaceae_unclassified	0	0	0	0	0	0	0	0	0	0	0	0	0.618182	0.881463	0	0.356436	0	0	0	0	0	0	0	0	0	0.801769	0	0	0	0.728935	0	0	0	0	0	0	0	0	0	0	0	0	-0.42209	0	0	0	0	0
417	ASV417_[Acidaminobacteraceae]_Guggenheimella	0	0	0	0	0.619592	0	0	0	0	0	0	0.668762	0	0	-0.526659	0	0	0.806061	0	0	0	0	0	0	0	0.547357	0	0	0	0	0	0	0	0	0	0	0	0	0	0	0	0	0	0	0	0	0	0
421	ASV421_Clostridium_butyricum	0	0	0	0	0	0	0	0	0	0	0	0	0	0	0	0	0	0	0	0	0	0	0	0	0	0	0	0	0	0	0	0	0	0	0	0	0	0	0	0	0	0	0	0	0	0	0	0
422	ASV422_Sphingobacteriaceae_unclassified	0	0	0	0	0	0	0	0	0	0	0	0	0	0	0	0	0	0	0	0	0	0	0	0	0	-0.618182	0	0	0	0	0	0	0	0	0	0	0	0	0	0	0	0	0.655352	-0.7042	0	0	0	0
424	ASV424_RF16_unclassified	0	0	0	0	0	0	0	0	0	0.987879	0	0	0	0	0	0.558939	1	0	0	0	0	0	0	0	0	0	0	0	0	0	0	0.997725	0	0	0	0	0	0	0	0	0	0	0	0	0	0	0	0
427	ASV427_Porphyromonadaceae_Paludibacter	0	0	0	0	0	0	0	0	0	0	0	0	0	0	0	0	0	0	0	0.708776	0.834674	0.664336	0	0	0	0	0	0	0.86014	0	0	0	0	0.814593	0	0	0	0	0	0	0	0	0	0	0	0	0	0
430	ASV430_Sphingobacteriaceae_unclassified	0	0	0	0	0	0	0	0	0	0	0	0	0	0	0	0	0	0	0	0	0	0	0	0	0	0	0	0	0	0	-0.588753	0	0	0	0	0	0	0	0	0	0	0	0	0	0	0	0	0.404379
435	ASV435_Planococcaceae_unclassified	-0.439338	0	0	0	0	0	0	0	0	0	0	0	0	0	0	0	0	0	0	0	0	0	0	0	0	0	0	0	0	0	0	0	0	0	0	0	0	0	0	0	0	0	0	0	0	0	0	0
436	ASV436_Bacteroidaceae_5-7N15	0	0	0	0	0	0	0	0	0	0	0	0	0	0	0	0	0	0	0	0	0	0	0	0	0	0	0	0	0	0	0	0	0	0	0	0	0	0	0	0	0	0	0	0	0	0	0	0
440	ASV440_Bacteroidales_unclassified	0	0	0	0	0	0	0	0	0	0	0	0	0	0	0	0	0	0	-0.551471	0	0	0	0	0	0	0	0	0	0	0	0.97039	0	0	0	0	0	0	0	0	0	0	0	0	0	0	0	0	-0.563296
441	ASV441_Lachnospiraceae_unclassified	0	0	0	0	0	0	0	0	0	0	0	0	0	0	0	0	0	0	0	0	0	0	0	0	0	0	0	0	0	0.500855	0	0	0	0	0	0	0	0	0	0	0	0	0	0	-0.424594	0	0	0
444	ASV444_Mycoplasmataceae_Mycoplasma	0	0	0	0	0	0	0	0	0	0	0	0	0	0	0	0	0	0	0	0	0	0	0	0	0	0	0	0	0	0	0	0	0	0	0	0	0	0	0	0	0	0	0	0	0	0	0	0
451	ASV451_Ruminococcaceae_unclassified	0	0	0	0	0	0	0	0	-0.625971	0	-0.512514	0	0	0	-0.465461	0	0	0	0	0	0	0	0	0	0	0	0	0	0	0	0	0	0	0	0	0	0	0	0	0	0	0	0	0	0	0	0	-0.629017
453	ASV453_Hyphomicrobiaceae_Devosia	0	0	0	0	0	0	0	0	0	0	0.299348	0	0	0	0	0	0	0	0	0	0	0	0	0	0	0	0	0	0	0	0	0	0	0	0	0	0	0.389668	0	0	0	0	0	0	0	0	0	0
454	ASV454_Pseudomonadaceae_unclassified	0	0	0	0	0	0	0	0	0	0	0	0	0	0	0	0	0	0	0	0	0	0	0	0	0	0	0	0	0	-0.506144	0	0	0	0	0	0	0	0	0	0	0	0	0	0	0	0	0	0
455	ASV455_Clostridiaceae_Clostridium	0	0	0	0	0	0	0	0	0	0.567493	0	0	0	0	0	0	0	0	0	0	0	0	0	0	0	0	0	0	0	0	0	0	0	0	0	0	0	-0.847265	0	0	0	0	0	0	0	0	0	0
456	ASV456_Sphingobacteriaceae_Sphingobacterium	0	-0.451029	0	0	0	0	0	0	0	0	0	0	0	0	0	0	0	0	0	0	0	0	0	0	0	0	0.335049	0	0	0	0	0	0	-0.63824	0	0	0	0	0	0	0	0	0.339895	0	0	0	0	0
457	ASV457_[Tissierellaceae]_unclassified	0	0	0	0	0	0	0	0	0	0	0	0.695887	0	0	-0.416289	0.363331	0.56044	0	0	0	0	0.629371	0	0	0	0.633967	0	0	0	0	0	0.972727	0	0	0	0	0	0	0	0	0	0	0	0	0	0	0	0
459	ASV459_Clostridiaceae_SMB53	0	0	0	0	0	0	0	0	0	0	0	0	0	0	0	0	0	0	0	0	0	0	0	0	0	0	0	0	0	0	0	0	0	0	0	0	0	0	0	0	0	0	0	0	0	0	0	0
461	ASV461_Alcaligenes_faecalis	0	0	0	0	0	0	0	0	0	0	0	0	0	0	0	0	0	0	-0.473342	0.656144	0	0	0	0	0	0	0	0	0	0	0	0	0	0	0	0	0	0	0	0	0	0	0	0	0	0	0	0
462	ASV462_Planococcaceae_unclassified	0	0	0	0	0	0	0	0	0	0	0	0	0	0	0	0	0	0	0	0	0	0	0	0	0	0	0	0	0	0	0	0	0	0	0	0	0	0	0	0	0	0	0	0	0	0.660606	0	0
464	ASV464_Saprospiraceae_unclassified	0	0	0	0	0	0	0	0	0	0	0	0	0	0	0	0	0	0	0	0	0	0	0	0	0	0	0	0	0	0	0	0	0	0	0	0	0	0	0	0	0	0	0	0	0	0	0	0
469	ASV469_Bacteroidaceae_BF311	0	0	0	0	0	0	0	0	0.398976	0	0	0	0	0	0	0	0	0	0	0	0	0	0	0	0	0	0	0	0	0.70141	0	0	0	0	0	0	0	0	0	0	0	0	0	0	0	0	0	0
474	ASV474_[Tissierellaceae]_GW-34	0	0	0	0	0	0	0	0	0	0	-0.468265	0	0	0	-0.394923	0.370376	0	0	0	0	0	0	0	0	0	0	0	0	0	0	0	0	0	0	0	0	0	0	0	0	0	0	-0.429662	0	0	0	0	0
476	ASV476_JG30-KF-CM45_unclassified	0	0	0	0	0	0	0	0	0	0	0	0	0	0	0	0	0	0	0	0	0	0	0	0	0	0	0	0	0	0	0	0	0	0	0	0	0	0	0	0	0	0	0	0	0	0	0	0
477	ASV477_Synergistaceae_vadinCA02	0	0	0	0	0	0	0	0	0	0	0	0	0	0.853247	0	0	0.802435	0.917582	0	0	0	0	0	0	0	0	0	0	0	0	0	0	0.493445	0	0	0	0	-0.46988	0	0	0	0	0	0	0	0	0	-0.390432
480	ASV480_Methanobacteriaceae_Methanobrevibacter	0	-0.441339	0	0.663636	0	0	0	0	-0.395321	0.638301	0	0	0	0	0	0	0.700526	0	0	0	0.963636	0	0	0	0	0	0	0	0	0	0	0	0	0	0	0	0	0	0	0	0	0	-0.538896	0	0	0	0	0
481	ASV481_Sphingobacteriaceae_Sphingobacterium	0	0	0	0	0	0	0	0	0	0	0	0	0	0	0	0	0	0	0	0	0	0	0	0	0	0	0	0	0	0	0	0	0	0	0	0	0	0	0	0	0	0	0	0	0	0	0	0
483	ASV483_[Acidaminobacteraceae]_Guggenheimella	0	0	0	0	0	0	-0.90303	0	0	0	0	0	0	0	0	0	0	0.745055	0	0.513613	0	0	0	0	0	0.945055	0	-0.616232	0	0	0	0	-0.331654	0	0	0	0	0	0	0	0	0	0	0	0	0	0	0
486	ASV486_Hyphomicrobiaceae_Devosia	0	0	-0.494528	0	0	0	0	0	0	0	0	0	0	0	0	0	0	0	0	0	0	0	0	0	0	0	0	0	0	0.498896	0	0	0	0	0	0	0	0	0	0	0	0	0	0	0	0	0	0
490	ASV490_Marinilabiaceae_unclassified	0	0	0	0	0	0	-0.733333	0	0	0	0	0	0	0	0	0	0	0	0	0	0	0	0	0	0	0	0	0	0	-0.489689	0	0	0	0	0	0	0	0	0	0	0	0	0	0	0	0	0	0
491	ASV491_Planococcaceae_Rummeliibacillus	0	0.552279	0	0	0	0	0	0	0	0	0	0	0	0	0	0.580882	0	0	0	0	0	0	0	0	0	0	0	0	0	0	0	0	0.517288	0	0	0	0	0	0	0	0	0	0	0	0	0	0	-0.69087
496	ASV496_Mycoplasmataceae_Mycoplasma	0	0	0	0	0	0	0	0	0	0	0	0	0	0	0	0	0	0	0	0	0	0	0	0	0	0	0	0	0	0	0	0	0	0	0	0	0	0	0	0	0	0	0	0	0	0	0	0
498	ASV498_[Acidaminobacteraceae]_Guggenheimella	0	0	0	0	0	0	0	0	0	0	0	0	0	0	0	0	0	0.69307	0	0	0	0	0	0	0	0	0	0	0	0	0	0	0	0	0	0	0	-0.445296	0	0.718182	0	0	0	0	0	0	0	0
504	ASV504_Alteromonadales_unclassified	0	0	0	0	0	0	0	0	0	0	0	0	0	0	0	0	0	0	0	0	0	0	0	0	0	0	-0.424735	0	0	0	-0.790277	0	0	0	0	0	0	0	0	0	0	0	0	0	0	0	0	0
506	ASV506_Intrasporangiaceae_unclassified	0	0	0	0	0	0	0	0	0	0	0	0	0	0	0	0	0	0	0	0	0	0	0	0	0	0	0	0	0	0	0	0	0	0	0	0	0	0	0	0	0	0	0	0	0	0	0	0
508	ASV508_Rhodocyclaceae_Thauera	-0.662617	0	0	0	0	0	0	0	0	0	0	0	0	0	0	0	0	0	0	0	0	0	0	0	0	0	0	0	0	0	0	0	0	0	0	0	0	0	0	0	0	0	0	0	0	0	0	0
511	ASV511_Xanthomonadaceae_Stenotrophomonas	-0.491729	0	0	0	0	0	0	0	0.362553	0	0	0	0	0	0	0	0	0	0	0	0	0	0	0	0	0	0	0	0	0	0	0	0	0	0	0	0	0	0	0	0	0	0	0	0	0	0	0
513	ASV513_Prevotellaceae_Prevotella	0	0	0	0	0	0	0	0	-0.386683	0	0	0	0	0	0	0	0	0	0	0	0	0	0	0	0	0	0	0	0	0	0	0.690909	0	0	0	0	0	0	0	0	0	0	0	0	-0.387634	0	0	0
515	ASV515_Ruminococcus_bromii	0	0	0	0	0	0	0	0	0	0	0	0	0	0	0	0	0	0	0	0	0	0	0	0	0	0	0	0	0	0	0	0	0	0	0	0	0	0	0	0	0	0	0	0	0	0	0	0
518	ASV518_Corynebacteriaceae_Corynebacterium	0	0	0	0	0	0	0	0	0	0	0	0	0	0	0.53832	0	0	0	0	0	0	0	0	0	0	0	0	0	0	0	0	0	0	0	0	0	0	0	0	0	0	0	0	0	0	0	0	0
523	ASV523_Dethiosulfovibrionaceae_HA73	0	0	0	0	0	0	0	0	0	0	0	0	0	0	0	0	0	0	0	0	0	0	0	0	0	0	0	0	0	0	0	0	0	0	0	0	0	0	0	0	0	0	0	0	-0.428447	0	0	0
524	ASV524_Brevundimonas_diminuta	0	0	0	0	0	-0.387992	0	0	0	0	0	0	0	0	0	0	0	0	0	0	0	0	0	0	0	0	0	0.781818	0	0	0	0	0	0	0	0	0	0	0	0	0	0	0	0	0	0	0	0
525	ASV525_Synergistaceae_vadinCA02	0	0	-0.643331	0	0	0	0	0	0.438161	0	0	0	0	0	-0.430054	0	0	-0.543455	0	0	0	0	0	0	0	0	0	0	0	0	0	0	0	0	0	0	0	0	0	0	0	0	0	0	0	0	0	0
528	ASV528_Succinivibrionaceae_Succinivibrio	0.538803	0.552256	0	0	0	0	0	0	-0.458022	0	-0.530805	0	0	0	0	0	0	0	0	0	0	0	0	0	0	0	0	0	0	0	0	0	0	0	0	0	0	-0.683373	0	0	0	0	0	0	0	0	0	0
530	ASV530_Aerococcaceae_unclassified	0	0	0	0	0	0	0	0	0	0	0	0	0	0	0.575851	0	0	0	0	0	0	0	0	0	0	0	0.489154	0	0	0	0	0	0	0	0	0	0	0.647987	0	0	0	0	0	0	0	0	0	0
535	ASV535_Nocardioidaceae_unclassified	0	0	0	0	0	0	0	0	-0.570202	0	-0.511733	0	0	0.878788	0	0	0	0	0	0	0	0	0	0	0	0	0	0	0	0.542857	0	0	0	0	0	0	0	0	0	0	0	0	0	0	0	0	0	0
538	ASV538_Ruminococcaceae_unclassified	0	0	0	0	0	0	0	0	-0.521314	0	0	0	0	0	0	0	0	0	0	0	0	0	0	0	0	0	0	0	0	0	0	0	0	0	0	0	0	-0.515085	0	0	0	0	0	0	0	0	0	0
539	ASV539_Cytophagaceae_unclassified	0	0	0	0	0	0	0	0	0	0	0	0	0	0	0	0	0	0	0	0	0.67033	0	0	0	0	0	0	0	0	0.630769	0.927273	0	0	0	0	0	0	0	0	0	0	0	0	0	0	0	0	0
540	ASV540_Microbacteriaceae_Leucobacter	0	0	0.355205	0	0	0	0	0	0	0.678322	0	0	0	0	0	0	0	0	0	0	0	0	0	0	0	0	0	0	0	0.616485	0	0	0	0	0	0	0	0	0	0	0	0	0	0	0	0	0	0
541	ASV541_Cyclobacteriaceae_unclassified	0	0	0	0	0	0	0	0	0	0	-0.350199	0	0	0	-0.428178	0	0	0	0	0	0	0	0	0	0	0	0	0	0	0	0	0	0	0	0	0	0	0	0	0	0	0	0	0	0	0	0	0
543	ASV543_Verrucomicrobiaceae_unclassified	0	0	0	0	0	0	0	0	0.54719	0	0.45942	0	0	0	0	0	0	0	0	0	0	0	0	0	0	0	0	0	0	0	0	0	0	0	0	0	0	0	0	0	0	0	0	0	-0.478738	0	0	0
545	ASV545_Aerococcaceae_Aerococcus	0	0	0	0	0	0	0	0	0	0	0	0	0	0	0	0	0	0	0.589652	0.783217	0	0	0	0	0	0	0	0	0	0	0	0	0	0	0	0	0	0	0	0	0	0	0	0	0	0	0	0
552	ASV552_Jonesiaceae_unclassified	0	0	0	0	0	0	0	0	0	0	0	0	0	0	0	0	0	0	0	0	0	0	0	0	0	0	0	0	0	0	0	0	0	0	0	0	0	0	0	0	0	0	0	0	0	0	0	0
557	ASV557_Jonesiaceae_unclassified	0	0	0	0	0	0	0	0	0	0	0	0	0	0	0	0	0	0	0	0	0	0	0	0	0	0	0	0	0	0	0	0	0	0	0	0	0	0	0	0	0	0	0	0	0	0	0	0
560	ASV560_Acidimicrobiales_unclassified	0	0	0	0	0	0	0	0	0	0	0	0	0	0	0	0	0	0	0	0	0	0	0	0	0	0	0	0	0	0	0	0	0	0	0	0	0	0	0	0	0	0	0	0	0	0	0	0
562	ASV562_[Paraprevotellaceae]_CF231	0	0	0	0	0	0	0	0	0	0	0	0	0	0	0	0	0	0	0	0	0	0	0	0	0	0	-0.411049	0	0	0	0	0	0	0	0	0	0	-0.459582	0	0	0	0	0	0	0	0	0	0
563	ASV563_GMD14H09_unclassified	0	0	0	0	0	-0.40932	0	0	0	0	0	0	0	0	0	0	0	0	-0.55418	0	0	0	0	0	0	0	0	0	0	0	0	0	0	0	0	0	0	0	0	0	0	0	0	0	0	0	0	0
568	ASV568_[Paraprevotellaceae]_[Prevotella]	0.521584	0	0	0	0	0	0	0	0	0	0	0	0	0	0	0	0	0	0	0.660606	0	0	0	0	0	0	0	0	0	0.665288	0	0	0	0	0	0	0	-0.590407	0.905779	0	0	0	0	0	0	0	0.70517	0
569	ASV569_JG30-KF-CM45_unclassified	0	0	0	0	0	0	0	0	0	0	0	0	0	0	0	0	0	0	0	0	0	0	0	0	0	0	0	0	0	0	0	0	0	0	0	0	0	0	0	0	0	0	0	0	0	0	0	0
577	ASV577_Pseudomonadaceae_unclassified	0.544118	0	0	0	0	0	0	0	-0.708791	0	0	0	0	0	0	0.517857	0	0	0	0	0	0	0	0	0	0	0	0	0	0	0	0	0	0	0	0	0	0	0	0	0	0	0	0	0	0	0	0
579	ASV579_Sphingobacteriaceae_Sphingobacterium	0	0	0	0	0	0.406491	0	0	0	0	0	0	0	0	-0.491368	0	0	0	0	0	0	0	0	0	0	0	0	0	0	0.648485	0	0	0	0	0	0	0	0	0	0	0	0	0	0	0	0	0	0
582	ASV582_Sanguibacteraceae_unclassified	0	0	0	0	0	0	0	0	0	0	0	0	0	0	0	0	0	0	0	0	0	0	0	0	0	0	0	0	0	0	0	0	0	0	0	0	0	0	0	0	0.842424	0	0	0	0	0	0	0
587	ASV587_Cyclobacteriaceae_unclassified	0	0	0	0	0	0	0	0	0	0	0	0	0	0	0	0	0	0	0	0	0	0	0	0	0	0	0	0	0	0	0	0	0	0	0	0	0	0	0	0	0	0	0	0	-0.371024	0	0	0
589	ASV589_Lachnospiraceae_Dorea	0	0	0	0	0	0	0	0	0	0	0	0	0	0	-0.450687	0	0	0	0	0	0	0	0	0	0	0	0	0	0	0	0	0	0	0	0	0	0	0	0	0	0	0	0	0	0	0	0	0
590	ASV590_Pusillimonas_noertemannii	0	0	0	0	0	0	0	0	0	0	0	0	0	0	-0.386835	0	0	0	0	0	0	0	0	0	0	0	0	0	0	0	0	0	0	0	0	0	0	0	0	0	0	0	0	0	0	0	0	0
591	ASV591_p-2534-18B5_unclassified	0	0	0	0	0	0	0	0	0	0	0	0	0	0	0	0	0	0	0	0	0	0.69697	0	0	0	0	0	0	0	0.651482	0	0	0	0	0	0	0	-0.606477	0	0	0	0	0	0	0	0	0	-0.396222
593	ASV593_Comamonadaceae_Hydrogenophaga	0	0	0	0	0	0	0	0	0	0	0	0.83891	0	0	0	0	0	0	0	0.97039	0	0	0	0	0	0	0.501097	0	0.618182	0	0	0	0	0	0	0	0	0	0	0	0	0	0	0.636364	-0.387295	0	0	0
596	ASV596_Ruminococcaceae_unclassified	0	0	0	0	0	0	0	0	0	0	0	0	0	0	0	0	0	0	0	0	0	0	0	0	0	0	0	0	0	0.648794	0	0	0	0	0	0	0	0	0	0	0	0	0	0	0	0	0	0
597	ASV597_Bacillaceae_unclassified	0	0	0	0	0	0	0	0	0	0	0	0	0	0	0	0	0	0	0	0	0	0	0	0	0	0	0	0	0	0	0	0	0	0	0	0	0	0	0	0	0	0	0	0	0	0	0	0
600	ASV600_p-2534-18B5_unclassified	0	-0.587912	0	0	0	0	0	0	0	0	0	0	0	0	0	0	0	0	0	0	0	0	0	0	0	0.86105	0	0	0	0	0	0	0	0	0	0	0	0	0	0	0	0	0.626994	0	0	0	0	0
602	ASV602_Prevotellaceae_Prevotella	0	0	0	0	0	0	0	0	0	0	0	0	0	0	0	0	0	0	0	0.997725	0	0	0	0	0	0	0	0	0	0	0	0	0	0.643357	0	0	0	0	0	0	0	0	0	0	0	0	0	0
603	ASV603_[Mogibacteriaceae]_Mogibacterium	0	0	0	0	0	0	0	0	0	0	0	0	0	0	0	0	0	0	0	0	0	0	0	0	0	0	0	0	0	0	0	0	0	0	0	0	0	0	0	0	0	0	0	0	0	0	0	0
606	ASV606_[Tissierellaceae]_GW-34	0	0	0	0	0	0	0	0	0	0	0	0	0	0	0	0	0	0	0	0	0.730769	0	0	0	0	0	0	0	0.684848	0	0	0	0	0	0	0	0	0	0	0	0	0	0	0	0	0	0	0
610	ASV610_Methanobacteriaceae_Methanobrevibacter	0	0	0	0	0	0	0	0	0	0	0	0	0	0	0	0.367464	0.739055	0	0	0	0	0	0	0	0	0	0	0	0	0	0	0.936364	0	0	0	0	0	0	0	0	0	0	0	0	0	0	0	0
613	ASV613_Prevotellaceae_Prevotella	0	0	0	0	0	0	0	0	-0.480372	0	0	0	0	0	0	0	0	0	0	0	0	0	0	0	0	0	0	0	0	0	0	0	0	0	0	0	0	0	0	0	0	0	0	0	0	0	0	0
614	ASV614_Clostridiaceae_unclassified	0.543828	0.616463	0	0	0	0	0	0	-0.588855	0	0	0	0	0	0	0	0	0	0	0	0	0	0	0	0	0	0	0	0	0	0	0	0.546429	0	0	0	0	0	0	0	0	0	0	0	0	0	0	0
617	ASV617_Clostridiaceae_Clostridium	0.551453	0	0	0	0	0	0	0	0	0	0	0	0	0	0	0	0	0	0	0	0	0	0	0	0	0	0	0	0	0	0	0	0	0	0	0	0	0	0	0	0.660606	0	0	0	0	0	0	0
618	ASV618_Trueperaceae_B-42	0	0	0	0	0	0	0	0	0	0	0	0	0	0	0	0	0	0	0	0	0	0	0	0	0	0	0	0	0	0	0	0	0	0	0	0	0	0	0	0	0	0	0	0	-0.501109	0	0	0
621	ASV621_Methanobacteriaceae_Methanosphaera	0	0	0	0	0	0	0	0	0	0	-0.470016	0	0	0	0	0	0	0	0	0	0	0	0	0	0	0	0	0	0	0	0	0	0	0	0	0	0	0	0	0	0	0	0	0	0	0	0	-0.424427
622	ASV622_Lachnospiraceae_Coprococcus	0	0	0	0	0	0	0	0	0	0	0	0	0	0	0	0	0.853147	0	0	0	0.878788	0	0	0	0	0	0	0	0	0	0.654746	0	0	0	0	0	0	0	0	0	0.99825	0	0	0	0.377304	0	0	0
623	ASV623_Verrucomicrobiaceae_unclassified	0	-0.546917	0	0	0	0	0	0	0	0	0	0	0	0	0	0	0	0	0	0	0	0	0	0	0	0	0	0	0	0	0	0	0	0	0	0	0	-0.55846	0	0	0	0	0.549562	0	0	0	0	0
625	ASV625_[Weeksellaceae]_unclassified	0	0	0	0	0	0	0	0	0	0	0	0	0	0	0	0	0	0	0	0	0	0	0	0	0	0	0	0	0	0	0	0	0	0	0	0	0	0	0	0	0	0	0	0	0	0	0	0
626	ASV626_Flavobacteriales_unclassified	0.5578	0	0	0	0	0	0	0	0	0	0	0	0	0	0	0	0	0	0	0	0	0	0	0	0	0	0	0	0	0	0	0	0	0	0	0	0	0	0	0	0	0	0	0	0	0	0	0
629	ASV629_Prevotellaceae_Prevotella	0	0	0	0	0	0	0	0	-0.390257	0	-0.488416	0	0	0	-0.377927	0	0	0	0	0	0	0	0	0	0	0	0	0	0	0	0	0	0	0	0	0	0	0	0	0	0	0	0	0	0	0	0	0
630	ASV630_Bacteroidales_unclassified	0	0.564835	0	0	0	0	0	0	0	0	0	0	0	0	0	0	0	0	0	0	0	0	0	0	0	0	0	0	0	0	0	0	0	0	0	0	0	0	0	0	0	0	0	0	-0.461731	0	0	0
632	ASV632_Actinomycetaceae_Trueperella	0	0	0	0	0	0	0	0	0	0	0	0	0	0	0	0	0	0	0	0.71804	0	0	0	0	0	0	-0.421157	0	0	0	0	0	0	0	0	0	0	0	0	0	0	0	0	0	0	0	0	0
634	ASV634_Sphingomonadaceae_Novosphingobium	0	0	0	0	0	-0.426261	0	0	0	0	0	0	0	0	0	0	0	0	0	0	0	0	0	0	0	0	0	0	0	0	0	0	0	0	0	0	0	0	0	0	0	0	0	0	0	0	0	0
636	ASV636_Rhodobacteraceae_Anaerospora	0	0	0	0	0	0	0	0	0	0	0	0	0	0	0	0	0	0	0	0	0	0	0	0	0	0	0	0	0	0	0	0	0	0	0	0	0	0	0	0	0	0	0	0	0	0	0	0
638	ASV638_Micrococcaceae_Micrococcus	0	0	0	0	0	0	0	0	-0.536592	0	-0.427602	0	0	0	-0.47828	0.759561	0	0	0	0	0	0	0	0	0	0	0	0	0	0	0	0	0	0	0	0	0	0	0	0	0	0	-0.581723	0	0	0	0	0
640	ASV640_Hyphomicrobiaceae_Devosia	0	0	0	0	0	0	0	0	0	0	0	0	0	0	0	0	0	0	0	0	0	0	0	0	0	0	0	0	0	0	0	0	0	0	0	0	0	0	0	0	0	0	0	0	0	0	0	0
641	ASV641_Lachnospiraceae_unclassified	0	0	0	0	0	0	0	0	-0.525	0	0	0	0	0	0.529536	0	0	0	0	0	0	0	0	0	0	0	0	0	0	0	0	0	0	0	0	0	0	0	0	0	0	0	0	0	0	0	0	0
642	ASV642_[Tissierellaceae]_Tissierella_Soehngenia	0	0	0	0	0	0	0	0	0	0	0	0	0	0	0	0	0	0	0	0	0	0	0	0	0	0	0	0	0	0	0	0.945455	0	0	0	0	0	0	0	0	0	0	0	0	0	0	0	0
646	ASV646_Veillonellaceae_Succiniclasticum	0	0	0	0	0	0	0	0	0	0	0	0	0	0	0	0	0	0	0	0	0	0	0	0	0	0	0	0	0	0	0	0	0	0	0	0	0	0	0	0	0	0	0	0	0	0	0	0
648	ASV648_[Tissierellaceae]_Helcococcus	0	0	0	0	0	0	0	0	0	0	0	0	0	0	0	0	0	0	0	0	0	0	0	0	0	0	0	0	0	0	0	0	0	0	0	0	0	0	0	0	0	0	0	0	0	0	0	0
650	ASV650_Clostridiales_unclassified	0	0	0	0	0	0	0	0	0	0	0	0	0	0	-0.573704	0	0	0	-0.608392	0	0	0	0	0	0	0	-0.447394	0	0	0	0	0	0	0	0	0	0	0	0	0	0	0	0	0	0	0	0	0
653	ASV653_Promicromonosporaceae_unclassified	0	0	0	0	0	0	0	0	0	0	0	0	0	0	0	0.452187	0	0	0	0	0	0	0	0	0	0	0	0	0	0	0	0	0	0	0	0	0	0	0	0	0	0	0	0	0	0	0	0
656	ASV656_Planococcaceae_unclassified	0	0	0	0	0	0	0	0	-0.416214	0	0	0	0	0	0	0	0	0	0	0	0	0	0	0	0	0	0	0	0	0	0	0	0	0	0	0	0	0	0	0	0	0	0	0	0	0	0	0
659	ASV659_Alteromonadaceae_Candidatus Endobugula	0	0	0	0	0	0	0	0	0	0	0	0	0	0	-0.394429	0	0	0	0	0	0	0	0	0	0	0	0	0	0	0	0	0	-0.399726	0	0	0	0	0	0	0	0	0	0	0	0	0	0	0
665	ASV665_Methanobacteriaceae_Methanobrevibacter	0	0	0	0	-0.694737	0	0	0	0	0	0	0	0	0	0	0.40104	0	0	0	0	0	0	0	0	0	0	0	0	0	0	0	0	0	0	0	0	0	0	0	0	0	0	0	0	0	0	0	0
668	ASV668_Xanthomonadaceae_unclassified	0	0.565122	0	0	0	0	0	0	0	0	0	0	0	0	0	0	0	0	0	0	0	0	0	0	0	0	0.803922	0	0	0	0	0	0	0	0	0	0	0	0	0	0	0	0	0	0	0	0	0
671	ASV671_Porphyromonadaceae_unclassified	0	0	0	0	0	0	0	0	0	0	0	0	0	0	0	0	0	0	0	0	0	0	0	0	0	0	0	0	0	0	0	0	0	0	0	0	0	0	0	0	0	0	0	0	0	0	0	0
672	ASV672_Xanthomonadaceae_unclassified	0	0	-0.535714	0	0	0	0	0	0	0	0	0	0	0	0	0	0	0	0	0	0	0	0	0	0	0	0	0	0	0	0	0	0	0	0	0	0	0	0	0	0	0	0	0	0	0	0	0
676	ASV676_Clostridiales_unclassified	0.835714	0	0	0	0	0	0	0	0	0	0	0	0	0	0	0	0	0	0	0	0	0	0	0	0	0	0	0	0	0	0	0	0	0	0	0	0	0	0	0	0	0	0	0	0	0	0	0
680	ASV680_[Paraprevotellaceae]_[Prevotella]	0	0	0	0	0	-0.585259	0	0	0	0	0	0	0	0	0	0	0	0	0	0	0	0	0	0	0	0	0	0	0	0	0	0	0	0	0	0	0	0	0	0	0	0	0	0	0	0	0	0
682	ASV682_Actinomycetaceae_unclassified	0	0	0	0	0	0	0	0	0	0	0	0	0	0	0	0	0	0	0.561765	0	0	0	0	0	0	0	0	0	0	0	0	0	0	0	0	0	0	0	0	0	0	0	0	0	0	0	0	0
684	ASV684_Microbacteriaceae_Leucobacter	0	0	0	0	0	0.479304	0	0	0	0	0.421413	0	0	0	0	0	0	0	0	0	0	0	0	0	0	0	0	0	0	0	0	0	0	0	0	0	0	0	0	0	0	0	0	0	0	0	0	0
685	ASV685_Actinomycetaceae_unclassified	0	0	0	0	0	0	0	0	0	0	0	0	0	0	0	0	0	0	0	0	0	0	0	0.672727	0	0	0	0	0	0	0	0	0	0	0	0	0	0	0	0	0	0	0	0	0	0	0	0
688	ASV688_Phyllobacteriaceae_unclassified	0	0	0	0	0	0	0	0	0	0	0	0	0	0	0	0	0	0	0	0	0	0	0	0	0	0	0.678947	0	0	0	0	0	0.525692	0	0	0	0	0	0	0	0	0	0	0	0	0	0	0
690	ASV690_Bacteria_unclassified	-0.532143	0	0	0	0	0	0	0	0	0	0	0	0	0	0	0	0	0	0	0	0	0	0	0	0	0	0	0	0	0	0	0	0.486279	0	0	0	0	0	0	0	0	0	0	0	0	-0.653846	0	0
697	ASV697_[Paraprevotellaceae]_YRC22	0	0	0	0	0	0	0	0	-0.477831	0	0	0	0	0	0	0	0	0	-0.605898	0	0	0	0	0	0	0	0.431111	0	0	0.744493	0	0	0	0	0	0	0	0	0	0	0	0	0	0	0	0	0	0
701	ASV701_Pseudomonas_stutzeri	0	-0.741259	0	0	0	0	0	0	0	0	0	0	0	0	0.451011	0	0	0	0	0	0	0	0	0	0	0	0	0	0	0	0	0	0	0	0	0	0	0	0	0	0	0	0	0	0	0	0	0
708	ASV708_Lachnospiraceae_unclassified	0	0	0	0	0	0	0	0	0	0	0	0	0	0	0	0	0	0	0	0	0	0	0	0	0	0	0	0	0	-0.793939	0	0	0	0	0	0	0	0	0	0	0	0	0	0	0	0	0	0
714	ASV714_[Tissierellaceae]_GW-34	0	0	0	0	0	0	0	0	0	0	0	0	0	0	0	0	0	0	0	0	0	0	0	0	0	0	-0.468334	0	0	0	0	0	0	0	0	0	0	0	0	0	0	0	0	0	0	0	0	0
715	ASV715_Clostridiales_unclassified	0	0	0	0	0	0	0	0	0	0	0	0	0	0	0	0	0	0	0	0	0	0	0	0	0	0	0	0	0	0	0	0	0	0	0	0	0	0	0	0	0	0	0	0	0	0	0.745455	0
716	ASV716_Alteromonadaceae_Marinobacter	0	0	0	0	0	0	0	0	0	0	0	0	0	0	-0.601236	0	0	0	0	0	0	0	0	0	0	0	-0.530782	0	0	0	0	0	0	0	0	0	0	0	0	0	0	0	0	0	0	0	0	0
718	ASV718_Bacteroidales_unclassified	0	0	0	0	1	0	0	0	0	0	0	0	0	0	0	0	0	0	0	0	0	0	0	0	0	0	0	0	0	0	0	0	0	0	0	0	0	0	0	0	0	0	0	0	0	0	0	0
719	ASV719_[Tissierellaceae]_Sedimentibacter	0	0	0	0	0	0	0	0	0	0	0	0	0	0	0	0	0	0	0	0	0	0	0	0	0	0	0	0	0	0	0	0	0	0	0	0	0	0	0	0	0	0	-0.502847	0	0	0	0	0
720	ASV720_[Paraprevotellaceae]_CF231	0	0	0	0	0	0	0	0	0	0	0	0	0	0	0	0	0	0	0	0	0	0	0	0	0	0	0	0	0	-0.58494	0	0	0.607516	0	0	0	0	0	0	0	0	0	0	0	0	0	0	0
726	ASV726_Yaniellaceae_Yaniella	0	0	0	0	0	0	0	0	0	0	0	0	0	0	0	0	0	0	0	0	0	0	0	0	0	0	0	0	0	0	0	0	0	0	0	0	0	0	0	0	0	0	0	0	0	0	0	0
727	ASV727_Xanthomonadaceae_Luteimonas	0	0	0	0	0	0	0	0	0	0	0	0	0	0	0	0	0	0	0	0	0	0	0	0	0	0	-0.461576	0	0	0	0	0	-0.437073	0	0	0	0	0	0	0	0	0	0	0	0	0	0	0
731	ASV731_Flavobacteriaceae_unclassified	0	0	0	0	0	0	0	0	0	0	0	0	0	0	0	0	0	0	0	0	0	0	0	0	0	0	0	0	0	0	0	0	0	0	0	0	0	0	0	0	0	0	0	0	0	0	0	0
734	ASV734_Xanthomonadaceae_Luteimonas	0	0	0	0	0	0	0	0	0	0	0	0	0	0	0	0	0	0	0	0	0	0	0	0	0	0	0	0	0	0	0	0	-0.49845	0	0	0	0	0	0	0	0	0	0	0	0	0	0	-0.58131
740	ASV740_Lachnospiraceae_Dorea	0	0	0	0	0	0	0	0	0	0	0	0	0	0	0	0	0	0	0	0	0	0	0	0	0	0	0	0	0	0	0	0	0	0	0	0	0	0	0	0	0	0	0	0	0	0	0	0
741	ASV741_Porphyromonadaceae_Paludibacter	0	0	0	0	0	0	0	0	0	0	0	0	0	0	0	0	0	0	0	0	0	0	0	0	0	0	0	0	0	0	0	0	0	0	0	0	0	0	0	0	0	0	0	0	0	0	0	0
743	ASV743_[Tissierellaceae]_ph2	0	0	0	0	0	0	0	0	0	0	0	0	0	0	0	0	0	0	0	0	1	0	0.739055	0	0	0	0	0	0	0	0	0	0	0	0	0	0	0	0	0	0	0	0	0	0	0	0	0
746	ASV746_Succinivibrionaceae_Ruminobacter	0	0	0	0	0	0	0	0	0	0	0	0	0	0	-0.612256	0	0	0	0	0	0	0	0	0	0	0	0	0	0	0	0	0	0	0	0	0	0	0	0	0	0	0	0	0	0	0	0	-0.496915
747	ASV747_Microbacteriaceae_Leucobacter	0	0	0	0	0	0	0	0	0	0	0	0	0	0	0	0	0	0	0	0	0	0	0	0	0	0	0	0	0	0	0	0	0	0	0	0	0	0	0	0	0	0	-0.508331	0	0	0	0	0
753	ASV753_Bacteroidaceae_Bacteroides	0	0	0	0	0	0	0	0	0	0	0	0	0	0	0	0	0	0	0	0	0	0	0	0	0	0	0	0	0	0	0	0	0	0	0	0	0	-0.581723	0	0	0	0	0.492321	0	0	0	0	0
761	ASV761_[Tissierellaceae]_Tissierella_Soehngenia	0.590977	0	0	0	0	0	0	0	0	0	0	0	0	0	0	0	0	0	0	0	0	0	0	0	0	0	0	0	0	0	0	0	0	0	0	0	0	0	0	0	0	0	0	0	0	0	0	0
767	ASV767_Faecalibacterium_prausnitzii	0	0	0	0	0	0	0	0	0	0	-0.543153	0	0	0	0	0.569954	0	0	0	0	0	0	0	0	0	0	0	0	0	0	0	0	0	0	0	0	0	0	0	0	0	0	0	0	0	0	0	-0.455863
771	ASV771_Lachnospiraceae_unclassified	0	0	0	0	0	0	0	0	0	0	0	0	0	0	0	0	0	0	0	0	0	0	0	0	0	0	0	0	0	0	0	0	0	0	0	0	0	0	0	0	0	0	0	0	0	0	0	0
772	ASV772_Prevotellaceae_Prevotella	0	0	0	0	0	0	0	0	0	0	0	0	0	0	0	0	0	0	0	0	0	0	0	0	0	0	0	0	0	0	0	0	0	0	0	0	0	0	0	0	0	0	0	0	0	0	0	0
775	ASV775_Microbacteriaceae_Pseudoclavibacter	0	0	0	0	0	0	0	0	0	0	0.529412	0	0	0	0	0	0	0	0	0	0	0	0	0	0	0	0	0	0	0	0	0	0	0	0	0	0	0	0	0	0	0	0	0	0	0	0	0
779	ASV779_planctomycete_MS3071	0	0	0	0	0	0	0	0	0	0	0	0	0	0	0	0	0	0	0	0	0	0	0	0	0	0	0	0	0	0	0	0	0	0	0	0	0	0	0	0	0	0	0	0	0	0	0	0
788	ASV788_Moraxellaceae_Acinetobacter	0	0	0	0	0	0	0	0	0	0	0	0	0	0	0	0	0	0	0	0	0	0	0	0	0	0	0	0	0	0	0	0	0	0	0	0	0	0	0	0	0	0	0	0	0	0	0	0
789	ASV789_[Weeksellaceae]_Wautersiella	0	0	0	0	0	0	0	0	-0.498214	0	0	0	0	0	0	0	0	0	0	0.963636	0	0.672727	0	0	0	0	0	0	0	0.626374	0	0	0	0	0	0	0	0	0	0	0	0	0	0	0	0	0	0
791	ASV791_Clostridiales_unclassified	0.589973	0	0	0	0	0	0	0	0	0	0	0	0	0	0	0.457957	0	0	0	0	0	0	0	0	0	0.997725	0	0	0	0	0	0	0	0	0	0	0	0	0	0	0	0	0	0	0	0	0	0
793	ASV793_Porphyromonadaceae_unclassified	0	0	0	0	0	0	0	0	0	0	0	0	0	0	0	0	0	0	0	0	0	0	0	0	0	0	0	0	0	0	0	0	0	0	0	0	0	0	0	0	0	0	0	0	0	0	0	0
795	ASV795_SR1_unclassified	0	0	0	0	0	0	0	0	0	0	0	0	0	0	0	0	0	0.881818	0	0	0	0	0	0	0	0	0	0	0	0	0	0	0	0	0	0	0	0	0	0	0	0	0	0	0	0	0	0
799	ASV799_Cyclobacteriaceae_unclassified	0	0	0	0	0	0	0	0	0	0	0	0	0	0	0	0	0	0	0	0	0	0	0	0	0	0	0	0	0	0	0	0	0	0	0	0	0	0	0	0	0	0	0	0	0	0	0	0
813	ASV813_S24-7_unclassified	0	0	0	0	0	0	0	0	0	0	0	0	0	0	-0.414586	0	0	0	0	0	0	0	0	0	0	0	0	0	0	0	0	0	0	0	0	0	0	0	0	0	0	0	0	0	0	0	0	0
817	ASV817_Lachnospiraceae_Coprococcus	0	0	0	0	0	0	0	0	0	0	0	0	0	0	0	0	0	0	0	0	0	0	0	0	0	0	0	0	0	0	0	0	0	0	0	0	0	0	0	0	0	0	0	0	0	0	0	0
822	ASV822_Clostridiales_unclassified	0	0	0	0	0	0	0	0	-0.415456	0	0	0	0	0	0	0	0	0	0	0	0	0	0	0	0	0	0	0	0	0	0	0	0	0	0	0	0	0	0	0	0	0	0	0	0	0	0	-0.43392
825	ASV825_Micrococcaceae_unclassified	0	0	0	0	0	0	0	0	0	0	0	0	0	0	0	0	0	0	0	0	0	0	0	0	0	0	0	0	0	0	0	0	0	0	0	0	0	0	0	0	0	0	0	0	0	0	0	0
826	ASV826_Flavobacteriaceae_unclassified	0	0.735566	0	0	0	0	0	0	0	0	0	0	0	0	0	0	0	0	0	0	0	0	0	0	0	0	0	0	0	0.609091	0	0	0	0	0	0	0	0	0	0	0	0	0	0	0	0	0	0
827	ASV827_Bacteria_unclassified	0	0	0	0	0	0	0	0	0	0	0	0	0	0	-0.738367	0	0	0	0	0	0.636364	0	0	0	0	0	0	0	0	0	0	0	0	0	0	0	0	0	0	0	0	0	0	0	-0.74032	0	0	0
831	ASV831_GMD14H09_unclassified	0.701099	0	0	0	0	-0.615254	0	0	0	0	0	0	0	0	0	0	0	0	0	0	0	0	0	0	0	0	0	0	0	0	0	0	0	0	0	0	0	0	0	0	0	0	0	0	0	0	0	0
832	ASV832_Bacteroidales_unclassified	0	0	0	0	0	0	0	0	0	0	0	0	0	0	0	0	0	0	0	0	0	0	0	0	0	0	0	0	0	0	0	0	0	0	0	0	0	0	0	0	0	0	0	0	0	0	0	-0.567541
834	ASV834_Methanocorpusculaceae_Methanocorpusculum	0	0	0	0	0	0	0	0	0	0	0	0	0	0	0	0	0.987879	0	0	0	0	0	0	0	0	0	0	0	0	0	0	0	0	0	0	0	0	0	0	0	0	0	0	0	0	0	0	0
837	ASV837_Alteromonadaceae_Cellvibrio	0	0	0	0	0	0	0	0	0	0	0	0	0	0	0.489099	0	0	0	0	0	0	0	0	0	0	0	0	0	0	0	0	0	0	0	0	0	0	-0.613187	0	0	0	0	0	0	0	0	0	0
838	ASV838_Clostridiales_unclassified	0	0	0	0	0	0	0	0	-0.546519	0	0	0	0	0	0	0	0	0	0	0	0	0	0	0	0	0	0	0	0	0	0	0	0	0	0	0	0	0	0	0	0	0	0	0	0	0	0	0
840	ASV840_Aerococcaceae_Alloiococcus	0	0	0	0	0	0	0	0	0	0	0	0	0	0	0	0	0	0	0	0	0	0	0	0	0	0	0	0	0	0	0	0	0	0	0	0	0	0	0	0	0	0	0	0	0	0	0	0
843	ASV843_Clostridiales_unclassified	0	0	0	0	0	0	0	0	0	0	0	0	0	0	0	0	0	0	0	0	0	0	0	0	0	0	0	0	0	0	0	0	0	0	0	0	0	0	0	0	0	0	0	0	0	0	0	0
847	ASV847_Xanthomonadaceae_Stenotrophomonas	0	0	0	0	0	0	0	0	0	0	0	0	0	0.807339	0.641491	0	0	0	0	0	0	0	0	0	0	0	0	0	0	0	0	0	0	0	0	0	0	0	0	0	0	0	0	0	0.498967	0	0	0
850	ASV850_[Tissierellaceae]_unclassified	0	0	0	0	0	0	0	0	0	0	0	0	0	0	0	0.483313	0	0	0	0	0	0	0	0	0	0	-0.493193	0	0	0	0	0	0	0	0	0	0	0	0	0	0	0	0	0	0	0	0	0
855	ASV855_Desulfomicrobiaceae_Desulfomicrobium	0	0	0	0	0	0	0	0	0	0	0	0	0	0	0	0	0	0	0	0	0	0	0	0	0	0	0	0	0	0	0	0	0	0	0	0	0	0	0	0	0	0	0	0	0	0	0	0
866	ASV866_[Paraprevotellaceae]_CF231	0	0	0	0	0	0	0	0	0	0	0	0	0	0	0	-0.677391	0	0	0	0	0	0	0	0	0	0	0	0	0	0	0	0	0	0	0	0	0	0	0	0	0	0	0	0	0	0	0	0
870	ASV870_Spirochaetaceae_Treponema	-0.660594	0	0	0	0	0	0	0	0	0	0	0	0	0	0	0	0	0	0	0	0	0	0	0	0	0	0	0	0	0	0	0	0	0	0	0	0	0	0	0	0	0	0	0	0	0	0	0
871	ASV871_Sphingobacteriaceae_Sphingobacterium	0	0	0	0	0	0	0	0	0	0	0	0	0	0	0	0	0	0	0	0	0	0	0	0	0	0	0	0	0	0.684848	0	0	0	0	0	0	0	0.492525	0	0	0	0	0	0.78022	0	0	0	-0.508118
872	ASV872_S24-7_unclassified	0.580038	0.721673	0	0	0	0	0	0	0	0	-0.560303	0	0	0	0	0	0	0	-0.680854	0	0	0	0	0	0	0	0	0	0	0	0	0	0	0	0	0	0	0	0	0	0	0	0	0	0	0	0	0
878	ASV878_Hyphomicrobiaceae_Devosia	0	0	0	0	0	0	0	0	-0.463361	0	-0.609816	0	0	0	0	0.687661	0	0	-0.640264	0	0	0	0	0	0	0	0	0	0	0	0	0	0	0	0	0	0	0	0	0	0	0	0	0	0	0	0	0
880	ASV880_VC2_1_Bac22_unclassified	0	0	0	0	0	0	0	0	0	0	0	0	0	0	0	0	0	0.604396	0	0	0	0	0	0	0	0	0	0	0	0	0	0	0	0	0	0	0	0	0	0	0	0	0.509573	0	0	0	0	0
881	ASV881_Ruminococcaceae_Ruminococcus	0.488344	0	0	0	0	0	0	0	0	0	0	0	0	0	0	0	0	0	0	0	0	0	0	0	0	0	0.521281	0	0	0.604396	0	0	0	0	0	0	0	0	0	0	0	0	0	0	0	0	0	0
888	ASV888_[Tissierellaceae]_unclassified	0	0	0	0	0	0	0	0	0	0	0	0	0	0	0	0	0	0	0	0	0	0	0	0	0	0	0	0	0	0	0	0	0.445992	0	0	0	0	0	0	0	0	0	0	0	0	0	0	0
891	ASV891_[Weeksellaceae]_unclassified	0	0	0	0	0	0	0	0	0	0	0	0	0	0	0	0	0	0	0	0	0	0	0	0	0	0	0	0	0	0	0	0	0	0	0	0	0	0	0	0	0	0	0	0	0	0	0	0
895	ASV895_Prevotellaceae_Prevotella	0	0	0	0	0	0	0	0	0	0	0	0	0	0	0	0	0	0	0	0	0	0	0	0	0	0	0	0	0	0	0	0	0	0	0	0	0	0	0	0	0	0	0	0	0	0	0	0
896	ASV896_Trueperaceae_unclassified	0	0	0	0	0	0	0	0	0	0	0	0	0	0	0	0.542999	0	0	0	0	0	0	0	0	0	0	0	0	0	0	0	0	0	0	0	0	0	0	0	0	0	0	0	0	0	0	0	0
897	ASV897_Intrasporangiaceae_unclassified	0	0	0	0	0	0	0	0	0	0	0	0	0	0	0	0	0	0	0	0	0	0	0	0	0	0	0	0	0	0	0	0	0	0	0	0	0	0	0	0	0	0	0	0	0	0	0	0
899	ASV899_Clostridiales_unclassified	0	0	0	0	0	0	0	0	0	0	0	0	0	0	-0.532454	0	0	0	0	0	0	0	0	0	0	0	0	0	0	0	0	0	0	0	0	0	0	0	0	0	0	0	0	0	0	0	0	0
902	ASV902_Sinobaca_beijingensis	0	0	0	0	0	0	0	0	0	0	0	0	0	0	0	0	0	0	0	0	0	0	0	0	0	0	0	0	0	0	0	0	0	0	0	0	0	0	0	0	0	0	0	0	0	0	0	0
904	ASV904_Bacteroidales_unclassified	0	0	0	0	0	0	0	0	-0.492285	0	0	0	0	0	0	0	0	0	0	0	0	0	0	0	0	0	0	0	0	0	0	0	0	0	0	0	0	0	0	0	0	0	0	0	0	0	0	0
905	ASV905_Porphyromonadaceae_unclassified	0	0	0	0	0	0	0	0	0	0	0	0	0	0	0	0.546429	0	0	0	0	0	0	0	0	0	0	0	0	0	0	0	0	0	0	0	0	0	0	0	0	0	0	0	0	0	0	0	0
906	ASV906_Ruminococcaceae_unclassified	0.625383	0	0	0	0	0	0	0	0	0	0	0	0	0	0	0.493252	0	0	0	0	0	0	0	0	0	0	0	0	0	0	0	0	0	0	0	0	0	0	0	0	0	0	0	0	0	0	0	0
907	ASV907_[Weeksellaceae]_unclassified	0	0	0	0	0	0	0	0	0	0	0	0	0	0	-0.472944	0.575116	0	0	0	0	0	0	0	0	0	0	0	0	0	0	0	0	0	0	0	0	0	0	0	0	0	0	-0.534066	0	0	0	0	0
910	ASV910_Clostridiaceae_Clostridium	0	0	0	0	0	-0.759044	0	0	0	0	0	0	0	0	0	0	0	0	0	0	0	0	0	0	0	0	0	0	0	0	0	0	0	0	0	0	0	0	0	0	0	0	0	0	0	0	0	0
912	ASV912_[Tissierellaceae]_unclassified	0	0	0	0	0	0	0	0	0	0	0	0	0	0	0	0	0	0	0	0	0	0	0	0	0	0	0	0	0	0	0	0	0	0	0	0	0	0	0	0	0	0	0	0	0	0	0	0
913	ASV913_[Paraprevotellaceae]_[Prevotella]	0	0	0	0	0	0	0	0	0	0	0	0	0	0	0	0	0	0	0	0	0	0	0	0	0	0	0	0	0	0	0	0	0	0	0	0	0	0	0	0	0	0	0	0	-0.505951	0	0	0
917	ASV917_Sphingobacteriaceae_Sphingobacterium	0	0	0	0	0	0	0	0	0	0	0	0	0	0	0	0	0	0	0	0	0	0	0	0	0	0	0	0	0	0	0	0	0	0	0	0	0	0	0	0	0	0	0	0	0	0	0	0
918	ASV918_Veillonellaceae_Veillonella	0	0	0	0	0	0	0	0	0	0	0	0	0	0	0	0	0	0	0	0	0	0	0	0	0	0	0	0	0	0	0	0	0	0	0	0	0	0	0	0	0	0	0	0	0	0	0	0
919	ASV919_Actinomyces_europaeus	0	0	0	0	0	0	0	0	0	0	0	0	0	0	0	0	0	0	-0.806061	0	0	0	0	0	0	0	0	0	0	0	0	0	-0.674003	0	0	0	0	0	0	0	0	0	0	0	0	0	0	0
927	ASV927_[Mogibacteriaceae]_unclassified	0.663636	0	0	0	0	0	0	0	0	0	0	0	0	0	0	0	0	0	0	0	0	0	0	0	0	0	0	0	0	0	0	0	0	0	0	0	0	0.647987	0	0	0	0	0	0	0	0	0	0
928	ASV928_Acholeplasmataceae_Acholeplasma	0	0	0	0	0	0	0	0	0	0	0	0	0	0	0	0	0	0	0	0	0	0	0	0	0	0	0	0	0	0	0	0	0	0	0	0	0	0	0	0	0	0	0	0	-0.58131	0	0	0
930	ASV930_Bacteroides_plebeius	0	0	0	0	0	0	0	0	0	0	0	0	0	0	0	0	0	0	0	0	0	0	0	0	0	0	0	0	0	0	0	0	0	0	0	0	0	0	0	0	0	0	0	0	0	0	0	0
931	ASV931_Rhodobacteraceae_Anaerospora	0	0	0	0	0	-0.577446	0	0	0	0	0	0	0	0	0	0	0	0	-0.627346	0	0	0	0	0	0	0	0	0	0	0	0	0	0	0	0	0	0	0	0	0	0	0	0	0	0	0	0	0
932	ASV932_Cytophagaceae_unclassified	0	0	0	0	0	0	0	0	0	0	0	0	0	0	0	0	0	0	0	0	0	0	0	0	0	0	0	0	0	0.70517	0	0	0	0	0	0	0	0	0	0	0	0	0	0	0	0	0	0
933	ASV933_Succinivibrionaceae_Ruminobacter	0	0	0	0	0	0	0	0	0	0	0	0	0	0	0	0	0	0	0	0	0	0	0	0	0	0	0	0	0	0	0	0	0	0	0	0	0	0	0	0	0	0	0	0	0	0	0	0
939	ASV939_[Paraprevotellaceae]_[Prevotella]	0	0	0	0	0	0	0	0	0	0	0	0	0	0	0	0	0	0	0	0	0	0	0	0	0	0	0	0	0	0	0	0	0	0	0	0	0	0	0	0	0	0	0	0	0	0	0	0
945	ASV945_Sphingobacteriaceae_unclassified	0	0	0	0	0	0	0	0	0	0	0	0	0	0	0	0	0	0	0	0	0	0	0	0	0	0	0	0	0	0	0	0	0	0	0	0	0	0	0	0	0	0	0	0	0	0	0	0
951	ASV951_Planctomycetaceae_Planctomyces	0	0	0	0	0	0	0	0	0	0	0	0	0	0	0	-0.767076	0	0	0	0	0	0	0	0	0	0	0	0	0	0	0	0	0	0	0	0	0	0	0	0	0	0	0	0	0	0	0	0
953	ASV953_Clostridiaceae_Clostridium	0	0	0	0	0	0	0	0	0	0	0	0	0	0	0	0	0	0	0	0	0	0	0	0	0	0	0	0	0	0	0	0	0	0	0	0	0	0	0	0	0	0	0	0	0	0	0	-0.5
954	ASV954_Actinomycetaceae_unclassified	0	0	0	0	0	0	0	0	0	0	-0.668842	0	0	0	0	0	0	0	0	0	0	0	0	0	0	0	0.4696	0	0	0	0	0	0	0	0	0	0	0	0	0	0	0	0	0	0	0	0	0
960	ASV960_Porphyromonadaceae_unclassified	0	0	0	0	0	0	0	0	0	0	0	0	0	0	0	0	0	0	0	0	0	0	0	0	0	0	0	0	0	0	0	0	0	0	0	0	0	0	0	0	0	0	0	0	0	0	0	0
961	ASV961_Chitinophagaceae_unclassified	0	0	0	0	0	0	0	0	0	0	0	0	0	0	0	0	0	0	0	0	0	0	0	0	0	0	0.570202	0	0	0	0	0	0	0	0	0	0	0	0	0	0	0	0.445621	0	0	0	0	0
962	ASV962_[Weeksellaceae]_unclassified	0	0	-0.640861	0	0	0	0	0	0.687661	0	0	0	0	0	0	-0.628571	0	0	0	0	0	0	0	0	0	0	0	0	0	0	0	0	0	0	0	0	0	0	0	0	0	0	0	0	0	0	0	0
967	ASV967_Streptococcaceae_Streptococcus	0	0	0	0	0	0	0	0	0	0	0	0	0	0	0	0	0	0	0	0	0	0	0	0	0	0	0	0	0	0	0	0	0	0	0	0	0	0	0	0	0	0	0	0	0	0	0	0
968	ASV968_Phyllobacteriaceae_unclassified	0	0	0	0	0	0	0	0	0	0	0	0	0	0	0	0	0	0	0	0	0	0	0	0	0	0	0	0	0	0	0	0	0	0	0	0	0	0	0	0	0	0	0	0	0	0	0	0
971	ASV971_Porphyromonadaceae_unclassified	0	0	0	0	0	0	0	0	0	0	0	0	0	0	0	0	0	0	0	0	0	0	0	0	0	0	0	0	0	0	0	0	0	0	0	0	0	0	0	0	0	0	0	0	0	0	0	0
974	ASV974_Actinomycetaceae_N09	0	0	0	0	0	0	0	0	0	0	0	0	0	0	0	0	0	0	0	0	0	0	0	0	0	0	0	0	0	0	0	0	0	0	0	0	0	0	0	0	0	0	0	0	0	0	0	-0.542356
986	ASV986_[Paraprevotellaceae]_YRC22	0	0	0	0	0	0	0	0	0	0	0	0	0	0	0	0	0	0	0	0	0	0	0	0	0	0	0	0	0	0	0	0	0	0	0	0	0	0	0	0	0	0	0	0	0	0	0	0
989	ASV989_Ruminococcaceae_unclassified	0	0.698238	0	0	0	0	0	0	0	0	0	0	0	0	0	0	0	0	0	0	0	0	0	0	0	0	0	0	0	0	0	0	0	0	0	0	0	0	0	0	0	0	0	0	0	0	0	0
993	ASV993_Pseudoxanthomonas_suwonensis	0	0	0	0	0	0	0	0	0	0	0	0	0	0	-0.442716	0	0	0	0	0	0	0	0	0	0	0	0	0	0	0.733333	0	0	0	0	0	0	0	0	0	0	0	0	0	0	0	0	0	0
1005	ASV1005_Peptococcaceae_Niigata-25	-0.56044	-0.745455	0	1	0	0	0	0	0	0	0	0	0	0	0	0	0	0	0	0	0	0	0	0	0	0	0	0	0	0	0	0	0	0	0	0	0	0	0	0	0	0	0	0	0	0	0	0
1009	ASV1009_Clostridiaceae_Clostridium	0	0	0	0	1	0	0	0	0	0	-0.627907	0	0	0	-0.531266	0	0	0	0	0	0	0	0	0	0	0	0	0	0	0	0	0	0	0	0	0	0	0	0	0	0	0	0	0	0	0	0	-0.5227
1012	ASV1012_Rhodobacteraceae_Paracoccus	0	0	0	0	0	0	1	0	0	0	0	0	0	0	0	0	0	0	0	0	0	0	0	0	0	0	0	0	0	0	0	0	0	0	0	0	0	0	0	0	0	0	0	0	0	0	0	0
1013	ASV1013_Pseudomonadaceae_unclassified	0	0	0	0	0	0	0	1	-0.619515	0	0	0	0	0	0	0	0	0	0	0	0	0	0	0	0	0	0	0	0	0	0	0	0	0	0	0	0	0	0	0	0	0	0	0	0	0	0	0
1027	ASV1027_S24-7_unclassified	0	0	0	0	0	0	0	0	0	1	0	0	0	0	0	0.717178	0	0	0	0	0	0	0	0	0	0	0	0	0	0	0	0	0	0	0	0	0	0	0	0	0	0	0	0	0	0	0	0
1030	ASV1030_PRR-11_unclassified	0	0	0	0	0	0	0	0	0	0	0	1	0	0	0	0	0	0	0	0	0	0	0	0	0	0	0	0	0	0	0	0	0	0	0	0	0	0	0	0	0	0	0.704029	0	-0.489417	0	0	0
1033	ASV1033_Succinivibrionaceae_unclassified	0	0	0	0	0	0	0	0	0	0	0	0	1	0	0	0.566593	0	0	0	0	0	0	0	0	0	0	0	0	0	0	0	0	0	0	0	0	0	0	0	0	0	0	0	0	0	0	0	0
1036	ASV1036_[Saprospirales]_unclassified	0	0	0	0	0	0	0	0	0	0	0	0	0	1	0	0.5187	0	0	0	0	0	0	0	0	0	0	0	0	0	0	0	0	0	0	0	0	0	0	0	0	0	0	-0.780488	0	0	0	0	0
1052	ASV1052_[Paraprevotellaceae]_YRC22	0	0	0	0	0	0	0	0	0	0	0	0	0	0	0	0.545924	1	0	0	0	0	0	0	0	0	0	0	0	0	0	0	0	0	0	0	0	0	0	0	0	0	0	0	0	0	0	0	0
1054	ASV1054_Gordoniaceae_Gordonia	0	0	0	0	0	0	0	0	0	0	0	0	0	0	0	0	0	1	0	0	0	0	0	0	0	0	0	0	0	0	0	0	0	0	0	0	0	0	0	0	0	0	0	0	0	0	0	0
1063	ASV1063_Anaerolinaceae_T78	0	0	0	0	0	-0.662267	0	0	0	0	0	0	0	0	0	0	0	0	0	1	0	0	0	0	0	0	0	0	0	0.739055	0	0	0	0	0	0	0	0	0	0	0	0	0	0	0	0	0	0
1071	ASV1071_Porphyromonadaceae_Paludibacter	0	0	0	0	0	0	0	0	0	0	0	0	0	0	0	0	0	0	0	0	1	0	0	0	0	0	0	0	0	0	0	0	0	0	0	0	0	0	0	0	0	0	-0.532454	0	0	0	0	0
1073	ASV1073_Clostridiaceae_Clostridium	0	0	0	0	0	0	0	0	0	0	0	0	0	0	-0.67033	0	0	0	0	0	0	1	0	0	0	0	0	0	0	0	0	0	0	0	0	0	0	0	0	0	0	0	0	0	0	0	0	-0.567857
1082	ASV1082_Ruminococcus_bromii	0.564835	0.78459	0	0	0	0	0	0	0	0	0	0	0	0	0	0	0	0	0	0	0	0	1	0	0	0	0	0	0	0	0	0	0	0	0	0	0	0	0	0	0	0	0	0	0	0	0	0
1083	ASV1083_Pseudomonadaceae_Pseudomonas	0	0	0	0	0	0	0	0	0	0	0	0	0	0	0	0	0	0	0	0	0	0	0	1	0	0	0	0	0	0	0	0	0	0	0	0	0	0	0	0	0	0	0	0	0	0	0	0
1084	ASV1084_Spirochaetaceae_Treponema	0.648119	0	0	0	0	0	0	0	0	0	0	0	0	0	0	0	0	0	0	0	0	0	0	0	1	0	0	0	0	0	0	0	0	0	0	0	0	0	0	0	0	0	0	0	0	0	0	0
1086	ASV1086_Flavobacteriaceae_unclassified	0.520886	0	0	0	0	0	0	0	0	0	0	0	0	0	0	0	0	0	0	0	0	0	0	0	0	1	0	0	0	0	0	0	0	0	0	0	0	0	0	0	0	0	0	0	0	0	0	0
1095	ASV1095_Bacteria_unclassified	0	0	0.669753	0	0	0	0	0	0	0	0	0	0	0	-0.53175	0	0	0	0	0	0	0	0	0	0	0	0	1	0	0	0	0	0	0	0	0	0	0	0	0	0	0	0	0	0	0	0	0
1098	ASV1098_Thermovum_composti	0	0	0	0	0	0	0	0	0	0	0	0	0	0	0	0	0	0	0	0	0	0	0	0	0	0	0	0	1	0	0	0	0.578022	0	0	0	0	0	0	0	0	0	0	0	0	0	0	0
1102	ASV1102_Sphingobacterium_mizutaii	0	0	0	0	0	0	0	0	0	0	0	0	0	0	0	0	0	0	0	0	0	0	0	0	0	0	0	0	0	0	1	0	0	0	0	0	0	0	0	0	0	0	0	0	0	0	0	0
1108	ASV1108_Acholeplasma_laidlawii	0	0	0	0	0	0	0	0	0	0	0	0	0	0	0	0	0	0	0	0	0	0	0	0	0	0	0	0	0	0	0	1	0	0	0	0	0	0	0	0	0	0	0	0	0	0	0	0
1110	ASV1110_Pseudomonadaceae_unclassified	0.534654	0.666669	0	0	0	0	0	0	0	0	-0.499079	0	0	0	-0.465562	0	0	0	0	0	0	0	0	0	0	0	0	0	0	0	0	0	0	1	0	0	0	0	0	0	0	0	0	0	0	0	0	0
1114	ASV1114_Bacteroidaceae_Bacteroides	0	0	0	0	0	0	0	0	0	0	0	0	0	0	0	0	0	0	0	0	0	0	0	0	0	0	0	0	0	0	0	0	0	0	1	0	0	0	0	0	0	0	0	0	0	0	0	0
1120	ASV1120_Sphingobacteriaceae_unclassified	0	0	0	0	0	0	0	0	0	0	0	0	0	0	0	0	0	0	0	0	0	0	0	0	0	0	0	0	0	0	0	0	0	0	0	1	0	0	0	0	0	0	0	0	0	0	0	0
1121	ASV1121_Xanthomonadaceae_Luteimonas	0.692857	0	0	0	0	-0.586813	0	0	-0.578658	0	0	0	0	0	0	0	0	0	-0.6655	0	0	0	0	0	0	0	0	0	0	0	0	0	0	0	0	0	1	0	0	0	0	0	0	0	0	0	0	0.570588
1130	ASV1130_Intrasporangiaceae_unclassified	0	0	0	0	0	0	0	0	-0.548189	0	0	0	0	0	0	0	0	0	0	0	0	0	0	0	0	0	0	0	0	0	0	0	0	0	0	0	0	0	1	0	0	0	0	0	0	0	0	0
1131	ASV1131_[Tissierellaceae]_unclassified	0	0	0	0	0	0	0	0	0.596974	0	0	0	0	0	0	0	0	0	0	0	0	0	0	0	0	0	0	0	0	0	0	0	0	0	0	0	0	0	0	1	0	0	0	0	-0.6	0	0	0
1137	ASV1137_Porphyromonadaceae_Paludibacter	0	0	0	0	0	0	0	0	0	0	0	0	0	0	0	0	0	0	0	0	0	0	0	0	0	0	0	0	0	0	0	0	0	0	0	0	0	0	0	0	1	0	0	0	0	0	0	0
1149	ASV1149_Rhodobacteraceae_unclassified	0.648485	0	0	0	0	0	0	0	0	0	0	0	0	0	0	0	0	0	0	0	0	0	0	0	0	0	0	0	0	0	0	0	0	0	0	0	0	0	0	0	0	1	0	0	0	0	0	0
1157	ASV1157_[Weeksellaceae]_unclassified	0	0	0	0	0	0	0	0	0	0	0	0	0	0	0	0	0	0	0	0	0	0	0	0	0	0	0	0	0	0	0	0	0	0	0	0	0	0.503682	0	0	0	0	-0.711285	1	0	0	0	0
1160	ASV1160_Intrasporangiaceae_unclassified	0	0	0	0	0	0	0	0	0	0	-0.648352	0	0	0	-0.674725	0	0	0	0	0	0	0	0	0	0	0	0	0	0	0	0	0	0	0	0	0	0	0	0	0	0	0	0	0	0	1	0	0
1164	ASV1164_Lachnospiraceae_Coprococcus	0	0	0	0	0	0	0	0	0	0	0	0	0	0	0	0	0	0	0	0	0	0	0	0	0	0	0	0	0	0	0	0	0	0	0	0	0	0	0	0	0	0	0	0	0	0	1	0
1170	ASV1170_Flavobacteriaceae_unclassified	0	0	0	0	0	0	0	0	0	0	0	0	0	0	0	0	0	0	0	0	0	0	0	0	0	0	0	0	0.648485	0	0	0	0	0	0	0	0	0	0	0	0	0	0	0	0	0	0	0
1179	ASV1179_Microbacteriaceae_Leucobacter	0	0	0	0	0	0	0	0	0	0	0	0	0	0	0	0	0	0	0	0	0	0	0	0	0	0	0	0	0	0	0	0	0	0	0	0	0	0	0	0	0	0	0.674931	0	0	0	0	0
1187	ASV1187_Sphingobacteriaceae_Sphingobacterium	0.708791	0.844989	0	0	0	0	0	0	0	0	0	0	0	0	0	0	0	0	0	0	0	0	0	0	0	0	0	0	0	0	0	0	0	0	0	0	0	0	0	0	0	0	0	0	0	0	0	0
1192	ASV1192_Microbacteriaceae_Leucobacter	0	0	0	0	0	0	0	0	0	0	0	0	0	0	-0.614252	0	0	0	0	0	0	0	0	0	0	0	0	0	0	0	0	0	0	0	0	0	0	0	0	0	0	0	0	0	0	0	0	0
1207	ASV1207_Flavobacteriaceae_unclassified	0	0	0	0	0	0	0	0	0	0	0	0	0	0	0	0	0	0	0	0	0	0	0	0	0	0	0	0	0	0	0	0	0	0	0	0	0	0	0	0	0	0	0	0	0	0	0	0
1215	ASV1215_Actinomycetaceae_unclassified	0.556373	0	0	0	0	0	0	0	0	0	0	0	0	0	0	0.688283	0	0	0	0	0	0	0	0	0	0	0	0	0	0	0	0	0	0	0	0	0	0	0	0	0	0	0	0	0	0	0	0
1216	ASV1216_Lachnospiraceae_Dorea	0	0	0	0	0	0	0	0	0	0	-0.50889	0	0	0	0	0.701514	0	0	0	0	0	0	0	0	0	0	0	0	0	0	0	0	0	0	0	0	0	0	0	0	0	0	0	0	0	0	0	0
1220	ASV1220_Lachnospiraceae_unclassified	0	0	0	0	0	0	0	0	0	0	0	0	0	0	0	0	0	0	0	0	0	0	0	0	0	0	0	0	0	0	0	0	0	0	0	0	0	0	0	0	0	0	0	0	0	0	0	0
1221	ASV1221_Hyphomicrobiaceae_Devosia	0	0	0	0	0	0	0	0	0	0	0	0	0	0	0	0	0	0	-0.745455	0	0	0	0	0	0	0	0	0	0	0	0	0	0	0	0	0	0	0	0	0	0	0	0	0	0	0	0	0
1222	ASV1222_Rhodobacteraceae_unclassified	0.665934	0.759285	0	0	0	0	0	0	0	0	0	0	0	0	0	0	0	0	0	0	0	0	0	0	0	0	0	0	0	0	0	0	0	0	0	0	0	0	0	0	0	0	0	0	0	0	0	0
1225	ASV1225_Cellulomonadaceae_Demequina	0	0	0	0	0	0	0	0	0	0	0	0	0	0	0	0	0	0	0	0	0	0	0	0	0	0	0	0	0	0	0	0	0	0	0	0	0	0	0	0	0	0	0	0	0	0	0	0
1228	ASV1228_Ruminococcaceae_unclassified	0	0	0	0	0	0	0	0	0	0	0	0	0	0	0	0	0	0	0	0	0	0	0	0	0	0	0	0	0	0	0	0	0	0	0	0	0	0	0	0	0	0	0	0	0	0	0	0
1236	ASV1236_Sphingobacteriaceae_unclassified	0	0	0	0	0	0	0	0	0	0	0	0	0	0	0	0	0	0	0	0	0	0	0	0	0	0	0	0	0	0	0	0	0	0	0	0	0	0	0	0	0	0	0	0	0	0	0	0
1242	ASV1242_S24-7_unclassified	0.762238	0	0	0	0	0	0	0	0	0	0	0	0	0	0	0	0	0	0	0	0	0	0	0	0	0	0	0	0	0	0	0	0	0	0	0	0	0	0	0	0	0	0	0	0	0	0	0
1245	ASV1245_Piscirickettsiaceae_Methylophaga	0.825083	0	0	0	0	0	0	0	0	0	0	0	0	0	0	0.878408	0	0	0	0	0	0	0	0	0	0	0	0	0	0	0	0	0	0	0	0	0	0	0	0	0	0	0	0	0	0	0	0
1248	ASV1248_Prevotellaceae_Prevotella	0	0	0	0	0	0	0	0	0	0	0	0	0	0	0	0	0	0	0	0	0	0	0	0	0	0	0	0	0	0	0	0	0	0	0	0	0	0	0	0	0	0	0	0	0	0	0	0
1262	ASV1262_Veillonellaceae_Megasphaera	0	0	0	0	0	0	0	0	0	0	0	0	0	0	0	0	0	0	0	0	0	0	0	0	0	0	0	0	0	0	0	0	0	0	0	0	0	0	0	0	0	0	0	0	0	0	0	0
1272	ASV1272_Porphyromonadaceae_unclassified	0	0	0	0	0	0	0	0	0	0	0	0	0	0	0	0	0	0	0	0	0	0	0	0	0	0	0	0	0	0	0	0	0	0	0	0	0	0	0	0	0	0	0	0	0	0	0	0.629263
1281	ASV1281_Gammaproteobacteria_unclassified	0	0	0	0	0	0	0	0	0	0	0	0	0	0	0	0	0	0	0	0	0	0	0	0	0	0	0	0	0	0	0	0	0	0	0	0	0	0	0	0	0	0	0	0	0	0	0	0
1283	ASV1283_Cryomorphaceae_Fluviicola	0	0	0	0	0	0	0	0	0	0	0	0	0	0	0	0	0	0	0	0	0	0	0	0	0	0	0	0	0	0	0	0	0	0	0	0	0	0	0	0	0	0	0	0	0	0	0	0
1330	ASV1330_Halomonadaceae_unclassified	0	0	0	0	0	-0.763182	0	0	0	0	0	0	0	0	0	0	0	0	0	0	0	0	0	0	0	0	0	0	0	0	0	0	0	0	0	0	0	0	0	0	0	0	0	0	0	0	0	0
1355	ASV1355_Rhodobacteraceae_Anaerospora	0	0	0	0	0	0	0	0	0	0	-0.501591	0	0	0	0	0	0	0	0	0	0	0	0	0	0	0	0	0	0	0	0	0	0	0	0	0	0	0	0	0	0	0	0	0	0	0	0	0
1358	ASV1358_Clostridiaceae_unclassified	0	0	0	0	0	0	0	0	0	0	0	0	0	0	0	0	0	0	0	0	0	0	0	0	0	0	0	0	0	0	0	0	0	0	0	0	0	0	0	0	0	0	0	0	0	0	0	-0.558824
1369	ASV1369_Leuconostocaceae_unclassified	0	0	0	0	0	0	0	0	0	0	0	0	0	0	0	0	0	0	0	0	0	0	0	0	0	0	0	0	0	0	0	0	0	0	0	0	0	0	0	0	0	0	0	0	0	0	0	0
1487	ASV1487_[Paraprevotellaceae]_YRC22	0	0	0	0	0	0	0	0	0	0	0	0	0	0	0	0	0	0	0	0	0	0	0	0	0	0	0	0	0	0	0	0	0	0	0	0	0	0	0	0	0	0	0	0	0	0	0	0
1546	ASV1546_Actinomycetaceae_Trueperella	0	0	0	0	0	0	0	0	0	0	0	0	0	0	0	0	0	0	0	0	0	0	0	0	0	0	0	0	0	0	0	0	0	0	0	0	0	0	0	0	0	0	0	0	-0.71978	0	0	0
[truncated: 441 more columns]
